# Supplementary material for: Integrated GWAS and transcriptomic analysis reveal the candidate salt-responding genes regulating Na+/K+ balance in barley (Hordeum vulgare L.)
Source: Front Plant Sci. 2023 Jan 20;13:1004477. doi: 10.3389/fpls.2022.1004477 (PMC9910287; doi:10.3389/fpls.2022.1004477)
Supplement: Supplementary file 2 [file Table_2.xls]

## Sheet: Table S2
Supplementary Table 2 Analysis of variance (ANOVA) results of the ion traits.
Traits	SS	MS	F-value
CK-Na+	2694.03	9.387	3.851**
CK-K+	51845.1	180.645	4.94**
CK-Na+/K+	1.005	0.004	4.132**
Salt-Na+	70341	245.091	4.748**
Salt-K+	7224.88	25.174	6.285**
Salt-Na+/K+	407.804	1.421	10.163**
R-Na+	14613.1	50.917	4.25**
R-K+	2.691	0.009	3.156**
R-Na+/K+	126790	441.777	3.93**
df indicates the degrees of freedom, SS indicates the sum of squares, MS indicates the mean square.
*, ** Significant differences at P < 0.05 and P < 0.01, respectively
