# Supplementary material for: Integrated GWAS and transcriptomic analysis reveal the candidate salt-responding genes regulating Na+/K+ balance in barley (Hordeum vulgare L.)
Source: Front Plant Sci. 2023 Jan 20;13:1004477. doi: 10.3389/fpls.2022.1004477 (PMC9910287; doi:10.3389/fpls.2022.1004477)
Supplement: Supplementary file 3 [file Table_3.xls]

## Sheet: Table S3
Supplementary Table 3 Correlation analysis between morphological traits and ion traits related to salt tolerance under salt treatment (300 mM NaCl) conditions after 3 weeks.
	Na+	K+	Na+/K+	SH	SL	RL	SeFW	SFW	RFW	SeDW	SDW	RDW	SeWC	SWC	RWC
Na+	1
K+	-.469**	1
Na+/K+	.885**	-.765**	1
SH	-.159**	.192**	-.185**	1
SL	-.231**	.190**	-.232**	.778**	1
RL	-0.072	.150*	-0.108	.894**	.433**	1
SeFW	-.415**	.333**	-.422**	.563**	.601**	.398**	1
SFW	-.453**	.308**	-.432**	.535**	.592**	.362**	.970**	1
RFW	-.242**	.349**	-.316**	.583**	.550**	.458**	.839**	.735**	1
SeDW	-.468**	.292**	-.434**	.517**	.585**	.339**	.918**	.916**	.732**	1
SDW	-.479**	.272**	-.434**	.496**	.569**	.319**	.908**	.914**	.683**	.988**	1
RDW	-.353**	.322**	-.374**	.514**	.546**	.357**	.817**	.763**	.834**	.858**	.808**	1
SeWC	-.419**	.346**	-.433**	.540**	.580**	.379**	.984**	.967**	.824**	.892**	.880**	.794**	1
SWC	-.442**	.308**	-.425**	.533**	.585**	.364**	.971**	.993**	.738**	.895**	.894**	.755**	.972**	1
RWC	-.236**	.347**	-.315**	.589**	.541**	.474**	.830**	.721**	.990**	.715**	.668**	.825**	.814**	.727**	1
LN	-.215**	.159**	-.229**	.271**	.150*	.285**	.527**	.529**	.417**	.566**	.571**	.451**	.509**	.506**	.411**
YLN	.245**	-0.074	.182**	.121*	-0.009	.182**	-.195**	-.260**	-0.011	-.276**	-.292**	-.163**	-.206**	-.252**	0.008
** representing significance at P < 0.01 level (two-tailed).
* representing significance at P < 0.05 level (two-tailed).
