# Supplementary material for: Integrated GWAS and transcriptomic analysis reveal the candidate salt-responding genes regulating Na+/K+ balance in barley (Hordeum vulgare L.)
Source: Front Plant Sci. 2023 Jan 20;13:1004477. doi: 10.3389/fpls.2022.1004477 (PMC9910287; doi:10.3389/fpls.2022.1004477)
Supplement: Supplementary file 5 [file Table_5.xls]

## Sheet: Table S5
Supplementary Table 5 List of 616 candidate genes with salt-tolerance related traits.
Number	Traits	Chromsome	Gene ID	Distance to nearest associated SNP(Kb)	Annotation	Log2FC C3h vs C0	Log2FC C12h vs C0	Log2FC C48h vs C0	Log2FC G3h vs G0	Log2FC 12h vs G0	Log2FC G48h vs G0
1	CK-K+	Chr2	HORVU2Hr1G002590	400-500	undescribed protein
2		Chr2	HORVU2Hr1G002600	400-500	Inosine-5'-monophosphate dehydrogenase
3		Chr2	HORVU2Hr1G002610	400-500	Cytochrome P450 superfamily protein
4		Chr2	HORVU2Hr1G002620	200-300	alpha/beta-Hydrolases superfamily protein
5		Chr2	HORVU2Hr1G002630	200-300	heptahelical transmembrane protein1
6		Chr2	HORVU2Hr1G002640	100-200	Chalcone synthase 4
7		Chr2	HORVU2Hr1G002650	100-200	Cytochrome P450 superfamily protein
8		Chr2	HORVU2Hr1G002660	100-200	receptor kinase 2					2.24512	1.61059
9		Chr2	HORVU2Hr1G002670	0-100	undescribed protein					1.92216	1.0483
10		Chr2	HORVU2Hr1G002680	0-100	unknown function
11		Chr2	HORVU2Hr1G002690	0-100	receptor kinase 2					1.23222
12		Chr2	HORVU2Hr1G002700	0-100	LIM domain-containing protein
13		Chr2	HORVU2Hr1G002710	0-100	Integral membrane protein hemolysin-III homolog						-1.03237
14		Chr2	HORVU2Hr1G002720	0-100	PLANT CADMIUM RESISTANCE 1					-1.74968	-2.11397
15		Chr2	HORVU2Hr1G002730	0-100	undescribed protein
16		Chr2	HORVU2Hr1G002740	0-100	undescribed protein
17		Chr2	HORVU2Hr1G002750	0-100	receptor kinase 2					2.58582
18		Chr2	HORVU2Hr1G002760	0-100	unknown function
19		Chr2	HORVU2Hr1G002770	0-100	undescribed protein
20		Chr2	HORVU2Hr1G002780	0-100	undescribed protein
21		Chr2	HORVU2Hr1G002790	0-100	undescribed protein
22		Chr2	HORVU2Hr1G002800	0-100	Serine/threonine-protein kinase
23		Chr2	HORVU2Hr1G002810	0-100	Retrotransposon protein, putative, Ty1-copia subclass
24		Chr2	HORVU2Hr1G002820	0-100	Gag/pol
25		Chr2	HORVU2Hr1G002830	0-100	Serine/threonine-protein kinase				-5.10131		-7.52176
26		Chr2	HORVU2Hr1G002840	0-100	receptor-like protein kinase 1		-4.11408
27		Chr2	HORVU2Hr1G002850	0-100	undescribed protein
28		Chr2	HORVU2Hr1G002860	0-100	undescribed protein
29		Chr2	HORVU2Hr1G002870	100-200	undescribed protein		-3.78559
30		Chr2	HORVU2Hr1G002880	100-200	Pectate lyase family protein					-6.27996	-4.34572
31		Chr2	HORVU2Hr1G002890	200-300	undescribed protein
32		Chr2	HORVU2Hr1G002900	200-300	undescribed protein
33		Chr2	HORVU2Hr1G002910	200-300	undescribed protein
34		Chr2	HORVU2Hr1G002920	200-300	undescribed protein					-6.41253	-4.07772
35		Chr2	HORVU2Hr1G002930	200-300	Pectate lyase family protein					-6.64355	-4.32338
36		Chr2	HORVU2Hr1G002940	200-300	unknown function
37		Chr2	HORVU2Hr1G002950	200-300	unknown function
38		Chr2	HORVU2Hr1G002960	200-300	methyl-CPG-binding domain protein 13
39		Chr2	HORVU2Hr1G002970	200-300	Chromosome 3B, genomic scaffold, cultivar Chinese Spring
40		Chr2	HORVU2Hr1G002980	200-300	unknown function
41		Chr2	HORVU2Hr1G002990	300-400	undescribed protein
42		Chr2	HORVU2Hr1G003000	300-400	undescribed protein
43		Chr2	HORVU2Hr1G003010	300-400	undescribed protein
44		Chr2	HORVU2Hr1G003020	300-400	TCP transcription factor
45		Chr2	HORVU2Hr1G003030	300-400	Chromosome 3B, genomic scaffold, cultivar Chinese Spring
46		Chr2	HORVU2Hr1G003040	300-400	Chromosome 3B, genomic scaffold, cultivar Chinese Spring		-6.32808			-3.133	-2.32512
47		Chr2	HORVU2Hr1G003050	300-400	undescribed protein
48		Chr2	HORVU2Hr1G003060	300-400	Chromosome 3B, genomic scaffold, cultivar Chinese Spring
49		Chr2	HORVU2Hr1G003070	400-500	Chromosome 3B, genomic scaffold, cultivar Chinese Spring
50		Chr2	HORVU2Hr1G003080	400-500	Chromosome 3B, genomic scaffold, cultivar Chinese Spring
51		Chr2	HORVU2Hr1G003090	400-500	undescribed protein
52		Chr2	HORVU2Hr1G003100	400-500	undescribed protein
53		Chr2	HORVU2Hr1G003110	400-500	Ectonucleoside triphosphate diphosphohydrolase 5				-8.28549	-13.5351	-13.2567
54		Chr2	HORVU2Hr1G091070	400-500	undescribed protein
55		Chr2	HORVU2Hr1G091080	400-500	P-loop containing nucleoside triphosphate hydrolases superfamily protein
56		Chr2	HORVU2Hr1G091090	400-500	receptor kinase 3
57		Chr2	HORVU2Hr1G091100	400-500	alpha 1,4-glycosyltransferase family protein						-5.75845
58		Chr2	HORVU2Hr1G091110	400-500	RNA polymerase II C-terminal domain phosphatase-like 1						1.50669
59		Chr2	HORVU2Hr1G091120	400-500	undescribed protein
60		Chr2	HORVU2Hr1G091130	400-500	Thioredoxin superfamily protein
61		Chr2	HORVU2Hr1G091140	400-500	undescribed protein
62		Chr2	HORVU2Hr1G091150	300-400	undescribed protein
63		Chr2	HORVU2Hr1G091160	300-400	Sphingolipid delta(4)-desaturase DES1-like					-2.93705
64		Chr2	HORVU2Hr1G091170	200-300	expansin B3					-4.67253	-4.9714
65		Chr2	HORVU2Hr1G091180	200-300	Transcription factor TFIIIC, tau55-related protein
66		Chr2	HORVU2Hr1G091190	200-300	sugar transporter 9
67		Chr2	HORVU2Hr1G091200	200-300	Thioredoxin superfamily protein
68		Chr2	HORVU2Hr1G091210	200-300	undescribed protein
69		Chr2	HORVU2Hr1G091220	200-300	E3 ubiquitin-protein ligase RMA1H1						-1.38132
70		Chr2	HORVU2Hr1G091230	200-300	Syntaxin-81
71		Chr2	HORVU2Hr1G091240	200-300	unknown protein; Has 30201 Blast hits to 17322 proteins in 780 species: Archae - 12; Bacteria - 1396; Metazoa - 17338; Fungi - 3422; Plants - 5037; Viruses - 0; Other Eukaryotes - 2996 (source: NCBI BLink).
72		Chr2	HORVU2Hr1G091250	200-300	undescribed protein
73		Chr2	HORVU2Hr1G091260	100-200	undescribed protein						1.1157
74		Chr2	HORVU2Hr1G091270	0-100	beta-xylosidase 2		2.17905	2.54471	1.1994	1.8711	1.12346
75		Chr2	HORVU2Hr1G091280	0-100	Hexosyltransferase	-1.534	-1.64276		-1.20238	-1.74931
76		Chr2	HORVU2Hr1G091290	0-100	GPI-anchored wall transfer protein 1
77		Chr2	HORVU2Hr1G091300	0-100	undescribed protein
78		Chr2	HORVU2Hr1G091310	0-100	undescribed protein
79		Chr2	HORVU2Hr1G091320	100-200	Calcium-dependent lipid-binding (CaLB domain) family protein
80		Chr2	HORVU2Hr1G091330	100-200	undescribed protein
81		Chr2	HORVU2Hr1G091340	100-200	undescribed protein
82		Chr2	HORVU2Hr1G091350	200-300	undescribed protein			1.13295
83		Chr2	HORVU2Hr1G091360	200-300	receptor kinase 2				-1.19219
84		Chr2	HORVU2Hr1G091370	200-300	tRNA-dihydrouridine synthase B
85		Chr2	HORVU2Hr1G091380	300-400	Dehydrogenase/reductase SDR family member 12
86		Chr2	HORVU2Hr1G091390	300-400	Protein kinase superfamily protein
87		Chr2	HORVU2Hr1G091400	300-400	Dehydrogenase/reductase SDR family member 12					-5.86907
88		Chr2	HORVU2Hr1G091410	400-500	unknown function			2.4303
89		Chr2	HORVU2Hr1G091420	400-500	unknown function
90		Chr2	HORVU2Hr1G091430	400-500	Dehydrogenase/reductase SDR family member 12	-1.19542
91		Chr2	HORVU2Hr1G091440	400-500	Dehydrogenase/reductase SDR family member 12			1.16516		-1.42494	1.45349
92		Chr2	HORVU2Hr1G091450	400-500	undescribed protein
93		Chr2	HORVU2Hr1G091460	400-500	Dehydrogenase/reductase SDR family member 12				-2.63535		-3.18043
94	R-Na+/K+	Chr4	HORVU4Hr1G087050	400-500	Pollen allergen Phl p 2
95		Chr4	HORVU4Hr1G087060	400-500	Protein kinase superfamily protein
96		Chr4	HORVU4Hr1G087070	400-500	expansin B2
97		Chr4	HORVU4Hr1G087080	300-400	undescribed protein
98		Chr4	HORVU4Hr1G087090	200-300	undescribed protein				-2.30428	-1.39894
99		Chr4	HORVU4Hr1G087100	200-300	Branched-chain-amino-acid aminotransferase 6			-1.67669		-1.1466	-2.88977
100		Chr4	HORVU4Hr1G087110	200-300	Fatty acyl-CoA reductase 1
101		Chr4	HORVU4Hr1G087120	200-300	E3 ubiquitin-protein ligase SINA-like 10			1.13034
102		Chr4	HORVU4Hr1G087130	100-200	F-box domain containing protein
103		Chr4	HORVU4Hr1G087140	100-200	undescribed protein
104		Chr4	HORVU4Hr1G087150	100-200	undescribed protein
105		Chr4	HORVU4Hr1G087160	100-200	undescribed protein
106		Chr4	HORVU4Hr1G087170	100-200	Retrotransposon protein, putative, unclassified
107		Chr4	HORVU4Hr1G087180	100-200	undescribed protein
108		Chr4	HORVU4Hr1G087190	100-200	Retrotransposon protein, putative, unclassified
109		Chr4	HORVU4Hr1G087200	100-200	Protein PAIR1	1.00839
110		Chr4	HORVU4Hr1G087210	100-200	unknown function
111		Chr4	HORVU4Hr1G087220	0-100	Plant protein of unknown function (DUF247)
112		Chr4	HORVU4Hr1G087230	0-100	Ectonucleoside triphosphate diphosphohydrolase 5			-3.93381			-2.76687
113		Chr4	HORVU4Hr1G087240	0-100	undescribed protein
114		Chr4	HORVU4Hr1G087250	0-100	HXXXD-type acyl-transferase family protein			-6.80265
115		Chr4	HORVU4Hr1G087260	0-100	undescribed protein
116		Chr4	HORVU4Hr1G087270	0-100	Retrotransposon protein, putative, unclassified
117		Chr4	HORVU4Hr1G087280	0-100	Retrotransposon protein, putative, unclassified
118		Chr4	HORVU4Hr1G087290	0-100	undescribed protein
119		Chr4	HORVU4Hr1G087300	0-100	undescribed protein
120		Chr4	HORVU4Hr1G087310	0-100	undescribed protein
121		Chr4	HORVU4Hr1G087320	0-100	undescribed protein
122		Chr4	HORVU4Hr1G087330	0-100	undescribed protein
123		Chr4	HORVU4Hr1G087340	100-200	60 kDa jasmonate-induced protein	2.44859	4.29464	7.27311	2.49765	5.95064	5.21259
124		Chr4	HORVU4Hr1G087350	100-200	UPF0187 protein YneE		-1.02073				1.31593
125		Chr4	HORVU4Hr1G087360	100-200	Mediator of RNA polymerase II transcription subunit 12
126		Chr4	HORVU4Hr1G087370	300-400	Ribosomal protein-like
127		Chr4	HORVU4Hr1G087380	300-400	rRNA N-glycosidase
128		Chr4	HORVU4Hr1G087390	300-400	nicotianamine synthase 3				-8.35954	-13.4113	-13.1346
129		Chr4	HORVU4Hr1G087400	300-400	rRNA N-glycosidase	5.08211	7.92425	11.0902		10.5168	9.45543
130		Chr4	HORVU4Hr1G087410	400-500	undescribed protein
131		Chr4	HORVU4Hr1G087420	400-500	undescribed protein
132		Chr4	HORVU4Hr1G087430	400-500	rRNA N-glycosidase	2.44859	4.29464	7.27311	2.49765	5.95064	5.21259
133		Chr4	HORVU4Hr1G087440	400-500	unknown function
134		Chr4	HORVU4Hr1G087450	400-500	RNA-directed DNA polymerase (Reverse transcriptase) domain containing protein
135		Chr4	HORVU4Hr1G087460	400-500	undescribed protein
136		Chr4	HORVU4Hr1G087470	400-500	undescribed protein
137		Chr4	HORVU4Hr1G087480	400-500	Retrotransposon protein, putative, unclassified
138		Chr4	HORVU4Hr1G087490	400-500	undescribed protein
139		Chr4	HORVU4Hr1G087500	400-500	unknown function						1.57113
140		Chr4	HORVU4Hr1G087510	400-500	HXXXD-type acyl-transferase family protein
141		Chr4	HORVU4Hr1G087520	400-500	Protein TIFY 6a				-3.09056	-9.38315	-9.10637
142		Chr4	HORVU4Hr1G087530	400-500	undescribed protein
143		Chr4	HORVU4Hr1G087540	400-500	Ribosomal protein-like
144		Chr4	HORVU4Hr1G087550	400-500	unknown function
145		Chr4	HORVU4Hr1G087560	400-500	Cytochrome P450 superfamily protein					-2.38155	-4.2377
146		Chr4	HORVU4Hr1G087570	400-500	Pentatricopeptide repeat-containing protein			-1.59914		-1.20455
147		Chr4	HORVU4Hr1G087580	400-500	Chromosome 3B, genomic scaffold, cultivar Chinese Spring	1.44913			1.84377		1.36223
148		Chr4	HORVU4Hr1G087590	400-500	Transcription factor bHLH35		-1.36375
149		Chr4	HORVU4Hr1G087600	400-500	undescribed protein
150		Chr4	HORVU4Hr1G087610	400-500	Transcription factor bHLH35	1.9398			2.17092	-2.46228
151		Chr4	HORVU4Hr1G087620	400-500	undescribed protein
152	Salt-Na+/K+	Chr4	HORVU4Hr1G087630	400-500	Cytochrome P450 superfamily protein					-2.45964	-2.92427
153		Chr4	HORVU4Hr1G087640	400-500	Transposon protein, putative, CACTA, En/Spm sub-class
154		Chr4	HORVU4Hr1G087650	400-500	Transmembrane protein
155		Chr4	HORVU4Hr1G087660	400-500	undescribed protein
156		Chr4	HORVU4Hr1G087670	400-500	ABC transporter ATP-binding protein NatA				-4.94589	-9.52868	-5.02108
157		Chr4	HORVU4Hr1G087680	200-300	Electron transfer flavoprotein subunit alpha, mitochondrial
158		Chr4	HORVU4Hr1G087690	100-200	Peroxidase
159		Chr4	HORVU4Hr1G087700	100-200	GRAS family transcription factor	1.43231		1.55428	1.2604
160		Chr4	HORVU4Hr1G087710	100-200	undescribed protein
161		Chr4	HORVU4Hr1G087720	100-200	Protein kinase superfamily protein	1.0296		1.08047
162		Chr4	HORVU4Hr1G087730	100-200	myb domain protein 37
163		Chr4	HORVU4Hr1G087740	0-100	tubulin beta chain 2				-2.45874	-2.61254	-1.69801
164		Chr4	HORVU4Hr1G087750	0-100	AT-hook motif nuclear-localized protein 1		-1.79028			-1.25209
165		Chr4	HORVU4Hr1G087760	0-100	Bifunctional inhibitor/lipid-transfer protein/seed storage 2S albumin superfamily protein			-6.5707		-6.68123	-2.64109
166	Salt-Na+ /K+ R-Na+ /K+	Chr4	HORVU4Hr1G087770	0-100	Bifunctional inhibitor/lipid-transfer protein/seed storage 2S albumin superfamily protein				7.24628
167		Chr4	HORVU4Hr1G087780	0-100	Bifunctional inhibitor/lipid-transfer protein/seed storage 2S albumin superfamily protein		-3.28147	-7.40437		-1.73869	-9.20774
168		Chr4	HORVU4Hr1G087790	0-100	undescribed protein
169		Chr4	HORVU4Hr1G087800	0-100	Bifunctional inhibitor/lipid-transfer protein/seed storage 2S albumin superfamily protein			-6.31851			-9.74921
170		Chr4	HORVU4Hr1G087810	0-100	undescribed protein
171		Chr4	HORVU4Hr1G087820	0-100	undescribed protein
172		Chr4	HORVU4Hr1G087830	0-100	unknown function
173		Chr4	HORVU4Hr1G087840	0-100	Protein of unknown function (DUF1218)	4.38371	2.22716	6.16366	2.64718	2.57662	1.95429
174		Chr4	HORVU4Hr1G087850	0-100	60S ribosomal protein L27-3
175		Chr4	HORVU4Hr1G087860	0-100	Bifunctional inhibitor/lipid-transfer protein/seed storage 2S albumin superfamily protein
176		Chr4	HORVU4Hr1G087870	0-100	Bifunctional inhibitor/lipid-transfer protein/seed storage 2S albumin superfamily protein
177		Chr4	HORVU4Hr1G087880	0-100	60S ribosomal protein L27-3
178		Chr4	HORVU4Hr1G087890	0-100	undescribed protein
179		Chr4	HORVU4Hr1G087900	0-100	Flavin-containing monooxygenase family protein
180		Chr4	HORVU4Hr1G087910	0-100	HXXXD-type acyl-transferase family protein
181		Chr4	HORVU4Hr1G087920	100-200	Bifunctional inhibitor/lipid-transfer protein/seed storage 2S albumin superfamily protein
182		Chr4	HORVU4Hr1G087930	100-200	undescribed protein
183		Chr4	HORVU4Hr1G087940	100-200	unknown function
184		Chr4	HORVU4Hr1G087950	100-200	Retrotransposon protein, putative, unclassified
185		Chr4	HORVU4Hr1G087960	200-300	Sodium transporter HKT1			-6.51283
186		Chr4	HORVU4Hr1G087970	200-300	TLD-domain containing nucleolar protein
187		Chr4	HORVU4Hr1G087980	300-400	zinc finger protein 4
188	Salt-Na+ Salt-Na+/K+ R-Na+ R-Na+ /K+	Chr4	HORVU4Hr1G087990	100-200	Endoglucanase 15
189		Chr4	HORVU4Hr1G088000	100-200	undescribed protein
190		Chr4	HORVU4Hr1G088010	100-200	Protein TIME FOR COFFEE
191		Chr4	HORVU4Hr1G088020	0-100	Protein NRT1/ PTR FAMILY 6.3					-5.66047	-10.4531
192		Chr4	HORVU4Hr1G088030	0-100	undescribed protein
193		Chr4	HORVU4Hr1G088040	0-100	undescribed protein
194		Chr4	HORVU4Hr1G088050	0-100	undescribed protein
195		Chr4	HORVU4Hr1G088060	0-100	Oxysterol-binding protein-related protein 2A
196		Chr4	HORVU4Hr1G088070	0-100	undescribed protein
197		Chr4	HORVU4Hr1G088080	100-200	expansin B2		-4.84114	-7.61638		-5.70145	-5.31302
198		Chr4	HORVU4Hr1G088090	200-300	receptor kinase 2
199		Chr4	HORVU4Hr1G088100	0-100	unknown function
200		Chr4	HORVU4Hr1G088110	0-100	Eukaryotic aspartyl protease family protein	-2.393	-2.16093	-4.97349	-3.56515	-2.48323	-4.61665
201		Chr4	HORVU4Hr1G088120	0-100	Retrotransposon protein
202		Chr4	HORVU4Hr1G088130	0-100	UvrB/uvrC motif-containing protein isoform 5	-1.06272	-2.00265	-1.33031		-1.2599
203		Chr4	HORVU4Hr1G088140	0-100	expansin B2					-11.9298	-11.6517
204		Chr4	HORVU4Hr1G088150	0-100	undescribed protein
205		Chr4	HORVU4Hr1G088160	0-100	Eukaryotic aspartyl protease family protein	-2.39045	-2.15554	-4.97717	-3.57353	-2.48159	-4.62576
206		Chr4	HORVU4Hr1G088170	0-100	Transposon protein, putative, CACTA, En/Spm sub-class
207		Chr4	HORVU4Hr1G088180	0-100	undescribed protein
208		Chr4	HORVU4Hr1G088190	0-100	2-phosphoglycerate kinase
209		Chr4	HORVU4Hr1G088200	0-100	Endonuclease-reverse transcriptase HmRTE-e01
210		Chr4	HORVU4Hr1G088220	0-100	undescribed protein
211		Chr4	HORVU4Hr1G088210	0-100	CCR4-NOT transcription complex subunit 1
212		Chr4	HORVU4Hr1G088230	0-100	Transposon protein, putative, CACTA, En/Spm sub-class
213		Chr4	HORVU4Hr1G088240	0-100	unknown function
214		Chr4	HORVU4Hr1G088250	0-100	undescribed protein
215		Chr4	HORVU4Hr1G088260	0-100	undescribed protein
216		Chr4	HORVU4Hr1G088270	0-100	ATP-dependent RNA helicase, putative
217		Chr4	HORVU4Hr1G088280	0-100	GATA transcription factor 2
218		Chr4	HORVU4Hr1G088290	0-100	undescribed protein
219		Chr4	HORVU4Hr1G088300	0-100	undescribed protein
220		Chr4	HORVU4Hr1G088310	0-100	undescribed protein
221		Chr4	HORVU4Hr1G088320	0-100	Double Clp-N motif-containing P-loop nucleoside triphosphate hydrolases superfamily protein
222		Chr4	HORVU4Hr1G088330	0-100	undescribed protein
223		Chr4	HORVU4Hr1G088340	0-100	2-oxoglutarate (2OG) and Fe(II)-dependent oxygenase superfamily protein						1.516
224		Chr4	HORVU4Hr1G088350	0-100	Agenet domain containing protein, expressed			-1.48883
225		Chr4	HORVU4Hr1G088360	0-100	undescribed protein
226		Chr4	HORVU4Hr1G088370	0-100	undescribed protein	-1.92631
227		Chr4	HORVU4Hr1G088380	0-100	undescribed protein			-1.59101
228		Chr4	HORVU4Hr1G088390	0-100	Coatomer, alpha subunit	1.12182
229		Chr4	HORVU4Hr1G088400	0-100	undescribed protein
230		Chr4	HORVU4Hr1G088410	0-100	unknown function
231		Chr4	HORVU4Hr1G088420	0-100	undescribed protein
232		Chr4	HORVU4Hr1G088430	0-100	Plant protein of unknown function (DUF828) with plant pleckstrin homology-like region		-1.35269
233		Chr4	HORVU4Hr1G088440	0-100	Methionyl-tRNA formyltransferase		-1.7211		-1.15973
234		Chr4	HORVU4Hr1G088450	0-100	Plant protein of unknown function (DUF828) with plant pleckstrin homology-like region
235		Chr4	HORVU4Hr1G088460	0-100	Serine/threonine-protein phosphatase 7 long form-like protein
236		Chr4	HORVU4Hr1G088470	0-100	phosphatidylserine decarboxylase 1
237		Chr4	HORVU4Hr1G088480	0-100	Chromosome 3B, genomic scaffold, cultivar Chinese Spring
238		Chr4	HORVU4Hr1G088490	0-100	Cell number regulator 6	1.24085
239		Chr4	HORVU4Hr1G088500	0-100	undescribed protein	-2.09665	-4.6021
240		Chr4	HORVU4Hr1G088510	0-100	undescribed protein
241		Chr4	HORVU4Hr1G088520	0-100	Core-2/I-branching beta-1,6-N-acetylglucosaminyltransferase family protein
242		Chr4	HORVU4Hr1G088530	0-100	Eukaryotic aspartyl protease family protein
243		Chr4	HORVU4Hr1G088540	0-100	Chromodomain-helicase-DNA-binding protein 1-like	-1.8301	-3.27458	-1.38723
244	Salt-Na+ Salt-Na+ /K+ R-Na+ /K+	Chr4	HORVU4Hr1G088550	0-100	undescribed protein
245		Chr4	HORVU4Hr1G088570	100-200	Leucine-rich repeat receptor-like protein kinase family protein
246		Chr4	HORVU4Hr1G088560	100-200	unknown function
247		Chr4	HORVU4Hr1G088580	100-200	Leucine-rich repeat receptor-like protein kinase family protein				-1.83147	-2.41002
248		Chr4	HORVU4Hr1G088590	100-200	unknown function			-8.45316	-1.51579	-1.8277
249		Chr4	HORVU4Hr1G088600	100-200	Leucine-rich repeat receptor-like protein kinase family protein				-7.56148	-7.86592
250		Chr4	HORVU4Hr1G088610	100-200	Quinone oxidoreductase
251		Chr4	HORVU4Hr1G088620	100-200	Phosphoglycerate mutase family protein		1.53889
252		Chr4	HORVU4Hr1G088630	100-200	unknown function
253		Chr4	HORVU4Hr1G088640	100-200	Retrotransposon protein, putative, unclassified
254		Chr4	HORVU4Hr1G088650	100-200	protein kinase family protein
255		Chr4	HORVU4Hr1G088660	100-200	E3 ubiquitin-protein ligase PRT6
256		Chr4	HORVU4Hr1G088670	200-300	unknown function						4.95926
257	R-Na+ R-Na+ /K+	Chr4	HORVU4Hr1G088680	200-300	unknown function
258		Chr4	HORVU4Hr1G088690	200-300	General transcription factor IIH subunit 5
259		Chr4	HORVU4Hr1G088700	200-300	ARABIDILLO-1
260		Chr4	HORVU4Hr1G088710	200-300	undescribed protein
261		Chr4	HORVU4Hr1G088720	200-300	Palmitoyl-protein thioesterase 1		1.1731	1.77587	1.43202	1.29732
262		Chr4	HORVU4Hr1G088730	200-300	undescribed protein
263		Chr4	HORVU4Hr1G088740	200-300	Class I glutamine amidotransferase-like superfamily protein
264		Chr4	HORVU4Hr1G088750	300-400	undescribed protein
265	CK-Na+	Chr5	HORVU5Hr1G094390	400-500	undescribed protein					6.71344	6.51075
266		Chr5	HORVU5Hr1G094400	400-500	unknown protein; LOCATED IN: chloroplast; EXPRESSED IN: 23 plant structures; EXPRESSED DURING: 15 growth stages; Has 30 Blast hits to 30 proteins in 13 species: Archae - 0; Bacteria - 0; Metazoa - 0; Fungi - 0; Plants - 30; Viruses - 0; Other Eukaryotes - 0 (source: NCBI BLink).	-1.57711	-3.83286	-1.00779	-1.62119	-3.29554
267		Chr5	HORVU5Hr1G094410	400-500	Transmembrane emp24 domain-containing protein A
268		Chr5	HORVU5Hr1G094420	400-500	BEACH domain-containing protein A2
269		Chr5	HORVU5Hr1G094430	400-500	Copper-transporting ATPase 1		1.27402
270		Chr5	HORVU5Hr1G094440	400-500	undescribed protein
271		Chr5	HORVU5Hr1G094450	400-500	UDP-Glycosyltransferase superfamily protein
272		Chr5	HORVU5Hr1G094460	400-500	HXXXD-type acyl-transferase family protein	6.8902		2.43997	7.54265	4.26615	4.27092
273		Chr5	HORVU5Hr1G094470	400-500	undescribed protein				-4.35366	-3.47154	-4.27505
274		Chr5	HORVU5Hr1G094480	400-500	ATP-dependent DNA helicase 2 subunit ku80
275		Chr5	HORVU5Hr1G094490	400-500	Bax inhibitor-1 family protein						3.06033
276		Chr5	HORVU5Hr1G094500	400-500	Histone H2B.1						1.18578
277		Chr5	HORVU5Hr1G094510	400-500	Protein kinase superfamily protein		1.02292
278		Chr5	HORVU5Hr1G094520	400-500	undescribed protein
279		Chr5	HORVU5Hr1G094540	400-500	WD-40 repeat family protein
280		Chr5	HORVU5Hr1G094530	400-500	ATP-dependent RNA helicase, mitochondrial, putative		1.37248			1.03813
281		Chr5	HORVU5Hr1G094550	400-500	undescribed protein
282		Chr5	HORVU5Hr1G094560	400-500	Pentatricopeptide repeat-containing protein
283		Chr5	HORVU5Hr1G094570	400-500	undescribed protein	2.35191
284		Chr5	HORVU5Hr1G094580	400-500	tRNA (guanine-N(7)-)-methyltransferase non-catalytic subunit			-1.02925
285		Chr5	HORVU5Hr1G094590	400-500	Protein of unknown function (DUF1677)	6.34671	3.16103	4.74273	5.63531
286		Chr5	HORVU5Hr1G124660	400-500	undescribed protein
287		Chr5	HORVU5Hr1G124670	400-500	TBC1 domain family member 15	1.55824	1.13221	1.19715	1.33866
288		Chr5	HORVU5Hr1G124680	400-500	Polyprotein
289		Chr5	HORVU5Hr1G124690	400-500	Retrotransposon protein, putative, unclassified
290		Chr5	HORVU5Hr1G124700	400-500	unknown protein; BEST Arabidopsis thaliana protein match is: unknown protein .
291		Chr5	HORVU5Hr1G124710	400-500	Leucine-rich repeat receptor-like protein kinase family protein		-1.07328
292		Chr5	HORVU5Hr1G124720	400-500	undescribed protein						1.19071
293		Chr5	HORVU5Hr1G124730	300-400	Chromosome 3B, genomic scaffold, cultivar Chinese Spring
294		Chr5	HORVU5Hr1G124740	200-300	undescribed protein
295		Chr5	HORVU5Hr1G124750	200-300	Cytokinin riboside 5'-monophosphate phosphoribohydrolase	-1.0996	-1.15774	-1.34827		-1.3973	-1.3891
296		Chr5	HORVU5Hr1G124760	200-300	undescribed protein
297		Chr5	HORVU5Hr1G124770	200-300	exportin 1A
298		Chr5	HORVU5Hr1G124780	100-200	undescribed protein						1.25615
299		Chr5	HORVU5Hr1G124790	100-200	unknown function						-1.40462
300		Chr5	HORVU5Hr1G124800	100-200	Serine/threonine-protein kinase		-1.66217
301		Chr5	HORVU5Hr1G124810	100-200	receptor kinase 1						-10.1252
302		Chr5	HORVU5Hr1G124820	0-100	Fatty acyl-CoA reductase 1
303		Chr5	HORVU5Hr1G124830	0-100	undescribed protein
304		Chr5	HORVU5Hr1G124840	0-100	unknown function
305		Chr5	HORVU5Hr1G124850	0-100	transducin family protein / WD-40 repeat family protein
306		Chr5	HORVU5Hr1G124860	0-100	Transducin beta-like protein 2
307		Chr5	HORVU5Hr1G124870	0-100	undescribed protein
308		Chr5	HORVU5Hr1G124880	0-100	MATE efflux family protein					-1.77284
309		Chr5	HORVU5Hr1G124890	0-100	undescribed protein					1.57968
310		Chr5	HORVU5Hr1G124900	0-100	unknown function
311		Chr5	HORVU5Hr1G124910	0-100	undescribed protein
312		Chr5	HORVU5Hr1G124920	0-100	DUF1499 family protein			-1.40473		-1.06612	-1.19909
313		Chr5	HORVU5Hr1G124930	0-100	undescribed protein
314		Chr5	HORVU5Hr1G124940	0-100	unknown function					-1.58333
315		Chr5	HORVU5Hr1G124950	0-100	Orphans transcription factor
316		Chr5	HORVU5Hr1G124960	100-200	La domain containing protein, expressed
317		Chr5	HORVU5Hr1G124970	100-200	undescribed protein
318		Chr5	HORVU5Hr1G124980	100-200	GDSL esterase/lipase
319		Chr5	HORVU5Hr1G124990	100-200	undescribed protein
320		Chr5	HORVU5Hr1G125000	100-200	GDSL esterase/lipase				-4.79232	-7.52214
321		Chr5	HORVU5Hr1G125010	100-200	ABC transporter G family member 3					-2.35241
322		Chr5	HORVU5Hr1G125020	100-200	undescribed protein
323		Chr5	HORVU5Hr1G125030	200-300	Heavy metal transport/detoxification superfamily protein
324		Chr5	HORVU5Hr1G125040	300-400	undescribed protein
325		Chr5	HORVU5Hr1G125050	400-500	Mediator of RNA polymerase II transcription subunit 13
326		Chr5	HORVU5Hr1G125060	400-500	undescribed protein
327		Chr5	HORVU5Hr1G125070	400-500	Chromosome 3B, genomic scaffold, cultivar Chinese Spring
328		Chr5	HORVU5Hr1G125080	400-500	unknown function
329		Chr5	HORVU5Hr1G125090	400-500	unknown function
330		Chr5	HORVU5Hr1G125100	400-500	unknown function
331		Chr5	HORVU5Hr1G125110	400-500	RNA polymerase sigma-C factor		-1.00209	-1.04352
332		Chr6	HORVU6Hr1G015580	400-500	undescribed protein
333		Chr6	HORVU6Hr1G015590	400-500	Rp1-D21					-2.26716	-3.89277
334		Chr6	HORVU6Hr1G015600	400-500	Transposon Ty1-BL Gag-Pol polyprotein
335		Chr6	HORVU6Hr1G015610	400-500	undescribed protein
336		Chr6	HORVU6Hr1G015620	400-500	unknown function
337		Chr6	HORVU6Hr1G015630	400-500	Serine/threonine-protein kinase
338		Chr6	HORVU6Hr1G015640	400-500	Chlororespiratory reduction31
339		Chr6	HORVU6Hr1G015650	400-500	undescribed protein	-1.80506			-1.83727	-1.24937	-1.39992
340		Chr6	HORVU6Hr1G015660	400-500	undescribed protein	-1.56365			-1.42917	-1.34116	-1.46689
341		Chr6	HORVU6Hr1G015670	400-500	beta-amylase 2
342		Chr6	HORVU6Hr1G015680	300-400	Retrotransposon protein, putative, unclassified
343		Chr6	HORVU6Hr1G015690	300-400	Pentatricopeptide repeat-containing protein		-1.05411	-1.43937		-1.43042	-1.24756
344		Chr6	HORVU6Hr1G015700	200-300	undescribed protein
345		Chr6	HORVU6Hr1G015710	200-300	undescribed protein
346		Chr6	HORVU6Hr1G015720	200-300	undescribed protein
347		Chr6	HORVU6Hr1G015730	200-300	undescribed protein
348		Chr6	HORVU6Hr1G015740	200-300	undescribed protein
349		Chr6	HORVU6Hr1G015750	200-300	undescribed protein
350		Chr6	HORVU6Hr1G015760	200-300	Histone H2B.2	2.58934				-1.20446
351		Chr6	HORVU6Hr1G015770	100-200	Photosystem II 5 kD protein	-1.75934	-2.32404	-2.25958	-1.44797	-2.38327	-2.0058
352		Chr6	HORVU6Hr1G015780	100-200	undescribed protein
353		Chr6	HORVU6Hr1G015790	100-200	Histone H2B.2	2.02086				-4.36184	-2.49502
354		Chr6	HORVU6Hr1G015800	0-100	undescribed protein
355		Chr6	HORVU6Hr1G015810	0-100	undescribed protein
356		Chr6	HORVU6Hr1G015820	0-100	undescribed protein
357		Chr6	HORVU6Hr1G015830	0-100	undescribed protein
358		Chr6	HORVU6Hr1G015840	0-100	undescribed protein			-3.14236			-1.40161
359		Chr6	HORVU6Hr1G015850	0-100	Protein of unknown function (DUF594)			-1.59729			-1.19847
360		Chr6	HORVU6Hr1G015860	0-100	undescribed protein
361		Chr6	HORVU6Hr1G015870	0-100	undescribed protein
362		Chr6	HORVU6Hr1G015880	0-100	undescribed protein
363		Chr6	HORVU6Hr1G015890	0-100	undescribed protein
364		Chr6	HORVU6Hr1G015900	0-100	NADH dehydrogenase [ubiquinone] 1 beta subcomplex subunit 3-B
365		Chr6	HORVU6Hr1G015910	0-100	undescribed protein
366		Chr6	HORVU6Hr1G015920	0-100	undescribed protein
367		Chr6	HORVU6Hr1G015930	0-100	undescribed protein
368		Chr6	HORVU6Hr1G015940	0-100	unknown function
369		Chr6	HORVU6Hr1G015950	100-200	NAC domain containing protein 3
370		Chr6	HORVU6Hr1G015960	0-100	undescribed protein
371		Chr6	HORVU6Hr1G015970	0-100	undescribed protein
372		Chr6	HORVU6Hr1G015980	0-100	undescribed protein
373		Chr6	HORVU6Hr1G015990	0-100	Retrotransposon protein, putative, unclassified
374		Chr6	HORVU6Hr1G016000	0-100	undescribed protein
375		Chr6	HORVU6Hr1G016010	0-100	undescribed protein
376		Chr6	HORVU6Hr1G016020	0-100	undescribed protein
377		Chr6	HORVU6Hr1G016030	0-100	undescribed protein
378		Chr6	HORVU6Hr1G016040	0-100	BED zinc finger family protein, expressed
379		Chr6	HORVU6Hr1G016050	0-100	undescribed protein
380		Chr6	HORVU6Hr1G016060	0-100	undescribed protein
381		Chr6	HORVU6Hr1G016070	0-100	Sodium Bile acid symporter family		-1.41126			-1.68948
382		Chr6	HORVU6Hr1G016080	0-100	Chaperone protein DnaJ
383		Chr6	HORVU6Hr1G016090	0-100	Transposon protein, putative, CACTA, En/Spm sub-class
384		Chr6	HORVU6Hr1G016100	0-100	ADP-ribosylation factor 1
385		Chr6	HORVU6Hr1G016110	0-100	undescribed protein
386		Chr6	HORVU6Hr1G016120	0-100	E3 ubiquitin-protein ligase SINAT2	2.2931	1.41832		1.59087
387		Chr6	HORVU6Hr1G016130	0-100	undescribed protein				4.07843		4.32933
388		Chr6	HORVU6Hr1G016140	100-200	Transposon protein, putative, CACTA, En/Spm sub-class
389		Chr6	HORVU6Hr1G016160	100-200	D.melanogaster polytene
390		Chr6	HORVU6Hr1G016150	100-200	ubiquitin 4
391		Chr6	HORVU6Hr1G016170	100-200	Chaperone protein dnaJ 2
392		Chr6	HORVU6Hr1G016180	200-300	undescribed protein
393		Chr6	HORVU6Hr1G016190	200-300	undescribed protein
394		Chr6	HORVU6Hr1G016200	200-300	ubiquitin 4
395		Chr6	HORVU6Hr1G016210	200-300	undescribed protein
396		Chr6	HORVU6Hr1G016220	200-300	undescribed protein
397		Chr6	HORVU6Hr1G016230	200-300	protein dimerizations
398		Chr6	HORVU6Hr1G016240	200-300	Transcription factor HBP-1a			-1.01821			-1.02348
399		Chr6	HORVU6Hr1G016250	200-300	BHLH transcription factor
400		Chr6	HORVU6Hr1G016260	200-300	Transducin/WD40 repeat-like superfamily protein
401		Chr6	HORVU6Hr1G016270	300-400	undescribed protein
402		Chr6	HORVU6Hr1G016280	400-500	acyl-CoA-binding protein 6
403		Chr6	HORVU6Hr1G016290	400-500	B3 domain-containing protein
404	R-Na+	Chr6	HORVU6Hr1G063780	400-500	RNA-directed DNA polymerase (Reverse transcriptase) domain containing protein
405		Chr6	HORVU6Hr1G063790	400-500	F1F0-ATPase inhibitor protein
406		Chr6	HORVU6Hr1G063800	400-500	C2 calcium/lipid-binding plant phosphoribosyltransferase family protein
407		Chr6	HORVU6Hr1G063810	200-300	Chaperone protein ClpB
408		Chr6	HORVU6Hr1G063820	0-100	undescribed protein					2.24485	2.57242
409		Chr6	HORVU6Hr1G063830	0-100	glutathione peroxidase 6		-1.26766
410		Chr6	HORVU6Hr1G063840	0-100	undescribed protein		-1.25644
411		Chr6	HORVU6Hr1G063850	0-100	Disease resistance protein RPP13						1.0039
412		Chr6	HORVU6Hr1G063860	0-100	tripeptidyl peptidase ii					1.80798	1.84764
413		Chr6	HORVU6Hr1G063870	0-100	undescribed protein
414		Chr6	HORVU6Hr1G063880	0-100	Retrotransposon protein, putative, unclassified
415		Chr6	HORVU6Hr1G063890	0-100	Ferredoxin--NADP reductase, leaf isozyme, chloroplastic						-13.1422
416		Chr6	HORVU6Hr1G063900	0-100	cDNA, clone: J065213I19, full insert sequence
417		Chr6	HORVU6Hr1G063910	0-100	tripeptidyl peptidase ii
418		Chr6	HORVU6Hr1G063920	0-100	undescribed protein
419		Chr6	HORVU6Hr1G063930	0-100	Cysteine-rich receptor-like protein kinase 41
420		Chr6	HORVU6Hr1G063940	100-200	unknown function				-1.51673	-1.61978	-2.11566
421		Chr6	HORVU6Hr1G063950	100-200	Histone-lysine N-methyltransferase
422		Chr6	HORVU6Hr1G063960	100-200	undescribed protein					-2.74136
423		Chr6	HORVU6Hr1G063970	200-300	undescribed protein
424		Chr6	HORVU6Hr1G063980	200-300	unknown function
425		Chr6	HORVU6Hr1G063990	400-500	undescribed protein				-5.03005	-7.73799	-7.46104
426		Chr6	HORVU6Hr1G064000	300-400	undescribed protein	3.87315	6.85975		4.95784	7.05547
427		Chr6	HORVU6Hr1G064010	300-400	Mitochondrial substrate carrier family protein			-1.18171
428		Chr6	HORVU6Hr1G064020	300-400	undescribed protein
429		Chr6	HORVU6Hr1G064030	300-400	undescribed protein
430		Chr6	HORVU6Hr1G064040	200-300	F-box family protein	1.07905
431		Chr6	HORVU6Hr1G064050	0-100	RNA-directed DNA polymerase (Reverse transcriptase) domain containing protein
432		Chr6	HORVU6Hr1G064060	0-100	unknown function
433		Chr6	HORVU6Hr1G064070	0-100	Subtilisin-like protease
434		Chr6	HORVU6Hr1G064080	0-100	Retrotransposon protein, putative, unclassified		1.16014		1.30593	1.29236
435		Chr6	HORVU6Hr1G064090	0-100	undescribed protein
436		Chr6	HORVU6Hr1G064100	0-100	undescribed protein
437		Chr6	HORVU6Hr1G064110	0-100	U-box domain-containing protein kinase family protein
438		Chr6	HORVU6Hr1G064120	0-100	APO protein 3, mitochondrial
439		Chr6	HORVU6Hr1G064130	0-100	protein kinase family protein					1.20915
440		Chr6	HORVU6Hr1G064140	0-100	Aquaporin-like superfamily protein			-1.4265
441		Chr6	HORVU6Hr1G064150	0-100	Protein kinase superfamily protein
442		Chr6	HORVU6Hr1G064160	0-100	undescribed protein
443		Chr6	HORVU6Hr1G064170	400-500	Cytochrome P450 superfamily protein			2.88108
444		Chr6	HORVU6Hr1G064180	400-500	3-isopropylmalate dehydratase, small subunit-like
445		Chr6	HORVU6Hr1G064190	400-500	Late embryogenesis abundant (LEA) hydroxyproline-rich glycoprotein family
446		Chr6	HORVU6Hr1G064200	200-300	undescribed protein
447		Chr6	HORVU6Hr1G064210	200-300	undescribed protein
448		Chr6	HORVU6Hr1G064220	0-100	nitrate reductase	-3.58344	-2.90402		-3.05043	-2.77957	-2.9721
449		Chr6	HORVU6Hr1G064230	0-100	Transmembrane protein 208
450		Chr6	HORVU6Hr1G064240	100-200	undescribed protein
451		Chr6	HORVU6Hr1G064250	0-100	Retrotransposon protein, putative, Ty3-gypsy subclass
452		Chr6	HORVU6Hr1G064260	0-100	undescribed protein				3.08763		3.45314
453		Chr6	HORVU6Hr1G064270	0-100	undescribed protein
454		Chr6	HORVU6Hr1G064280	0-100	Transposon protein, putative, CACTA, En/Spm sub-class					2.60668	3.87285
455		Chr6	HORVU6Hr1G064290	0-100	undescribed protein
456		Chr6	HORVU6Hr1G064300	0-100	RING/U-box superfamily protein
457		Chr6	HORVU6Hr1G064310	0-100	undescribed protein
458		Chr6	HORVU6Hr1G064320	0-100	LYR family of Fe/S cluster biogenesis protein					-1.28779
459		Chr6	HORVU6Hr1G064330	0-100	undescribed protein
460		Chr6	HORVU6Hr1G064340	100-200	unknown function					-1.32012	-1.55204
461		Chr6	HORVU6Hr1G064350	400-500	unknown function				-5.55117
462		Chr6	HORVU6Hr1G064360	400-500	undescribed protein
463		Chr6	HORVU6Hr1G064370	400-500	Ethylene-responsive transcription factor 1
464		Chr6	HORVU6Hr1G064380	400-500	undescribed protein
465		Chr6	HORVU6Hr1G064400	200-300	undescribed protein
466		Chr6	HORVU6Hr1G064390	200-300	undescribed protein
467		Chr6	HORVU6Hr1G064410	200-300	undescribed protein
468		Chr6	HORVU6Hr1G064420	200-300	undescribed protein
469		Chr6	HORVU6Hr1G064430	0-100	Hippocampus abundant transcript 1 protein			7.34938		3.30042
470		Chr6	HORVU6Hr1G064440	0-100	Late embryogenesis abundant protein, group 2	-6.03032
471		Chr6	HORVU6Hr1G064450	400-500	Protein RMD5 homolog A
472		Chr6	HORVU6Hr1G064590	400-500	NADH-ubiquinone oxidoreductase chain 3
473		Chr6	HORVU6Hr1G064600	400-500	undescribed protein
474		Chr6	HORVU6Hr1G064610	400-500	GDSL esterase/lipase	1.84567	2.05847	2.53984	2.08674	1.90331	1.67721
475		Chr6	HORVU6Hr1G064620	0-100	Dehydrin COR410	3.45442		1.33849	3.12746		1.1259
476	Salt-Na+	Chr7	HORVU7Hr1G101270	400-500	auxin response factor 16			1.23045
477		Chr7	HORVU7Hr1G101280	400-500	undescribed protein
478		Chr7	HORVU7Hr1G101290	100-200	undescribed protein
479		Chr7	HORVU7Hr1G101300	0-100	undescribed protein	2.99337	2.91232	5.29932	4.3316	4.93479	6.63257
480		Chr7	HORVU7Hr1G101310	0-100	Calcium-dependent lipid-binding (CaLB domain) family protein	2.90757	2.89439	5.14154	3.34575	3.72742	5.34217
481		Chr7	HORVU7Hr1G101320	0-100	Cellular nucleic acid-binding protein
482		Chr7	HORVU7Hr1G101330	0-100	undescribed protein
483		Chr7	HORVU7Hr1G101340	100-200	Aspartic proteinase nepenthesin-2
484		Chr7	HORVU7Hr1G101350	100-200	undescribed protein
485		Chr7	HORVU7Hr1G101360	100-200	unknown function
486		Chr7	HORVU7Hr1G101370	100-200	Retrotransposon protein, putative, unclassified
487		Chr7	HORVU7Hr1G101380	100-200	Retrotransposon protein, putative, unclassified
488		Chr7	HORVU7Hr1G101390	100-200	Ran-binding protein 3-like
489		Chr7	HORVU7Hr1G101400	200-300	undescribed protein						1.16732
490		Chr7	HORVU7Hr1G101410	400-500	rRNA N-glycosidase
491		Chr7	HORVU7Hr1G101420	400-500	undescribed protein
492		Chr7	HORVU7Hr1G101430	400-500	undescribed protein
493		Chr7	HORVU7Hr1G101440	400-500	unknown function
494		Chr7	HORVU7Hr1G101450	400-500	undescribed protein
495	Salt-Na+ Salt-Na+ /K+	Chr7	HORVU7Hr1G101460	300-400	60 kDa jasmonate-induced protein				-1.00287		-1.14934
496		Chr7	HORVU7Hr1G101470	300-400	rRNA N-glycosidase
497		Chr7	HORVU7Hr1G101480	300-400	undescribed protein
498		Chr7	HORVU7Hr1G101490	200-300	F-box/RNI-like/FBD-like domains-containing protein
499		Chr7	HORVU7Hr1G101500	200-300	External alternative NAD(P)H-ubiquinone oxidoreductase B1, mitochondrial					1.04534
500		Chr7	HORVU7Hr1G101510	200-300	60 kDa jasmonate-induced protein
501		Chr7	HORVU7Hr1G101520	0-100	undescribed protein
502		Chr7	HORVU7Hr1G101530	0-100	ARM repeat superfamily protein					-1.34551
503		Chr7	HORVU7Hr1G101540	0-100	undescribed protein
504		Chr7	HORVU7Hr1G101550	0-100	unknown function					-4.69785	-3.11008
505		Chr7	HORVU7Hr1G101560	0-100	undescribed protein
506		Chr7	HORVU7Hr1G101570	0-100	undescribed protein
507		Chr7	HORVU7Hr1G101580	0-100	Wound-responsive family protein			3.27783
508		Chr7	HORVU7Hr1G101590	0-100	Cytochrome P450 superfamily protein
509		Chr7	HORVU7Hr1G101600	0-100	undescribed protein
510		Chr7	HORVU7Hr1G101610	0-100	Cytochrome P450 superfamily protein
511		Chr7	HORVU7Hr1G101620	100-200	undescribed protein
512		Chr7	HORVU7Hr1G101630	300-400	undescribed protein
513		Chr7	HORVU7Hr1G101640	300-400	calmodulin-like 11
514		Chr7	HORVU7Hr1G101650	300-400	undescribed protein			6.13878
515		Chr7	HORVU7Hr1G101660	300-400	undescribed protein
516		Chr7	HORVU7Hr1G101670	300-400	undescribed protein
517		Chr7	HORVU7Hr1G101680	400-500	undescribed protein
518		Chr7	HORVU7Hr1G101690	400-500	unknown function
519		Chr7	HORVU7Hr1G103230	400-500	undescribed protein
520		Chr7	HORVU7Hr1G103240	400-500	undescribed protein
521		Chr7	HORVU7Hr1G103250	400-500	undescribed protein
522		Chr7	HORVU7Hr1G103260	400-500	undescribed protein
523		Chr7	HORVU7Hr1G103270	400-500	Transposase
524		Chr7	HORVU7Hr1G103280	400-500	undescribed protein
525		Chr7	HORVU7Hr1G103290	400-500	undescribed protein
526		Chr7	HORVU7Hr1G103300	400-500	undescribed protein
527		Chr7	HORVU7Hr1G103310	400-500	undescribed protein
528		Chr7	HORVU7Hr1G103320	300-400	undescribed protein
529		Chr7	HORVU7Hr1G103330	300-400	polyubiquitin 10		-1.29062
530		Chr7	HORVU7Hr1G103340	300-400	undescribed protein
531		Chr7	HORVU7Hr1G103350	300-400	undescribed protein
532		Chr7	HORVU7Hr1G103360	300-400	undescribed protein
533		Chr7	HORVU7Hr1G103370	200-300	undescribed protein
534		Chr7	HORVU7Hr1G103380	200-300	ubiquitin 4		-1.29062
535		Chr7	HORVU7Hr1G103390	200-300	undescribed protein
536		Chr7	HORVU7Hr1G103400	200-300	undescribed protein
537		Chr7	HORVU7Hr1G103410	200-300	undescribed protein
538		Chr7	HORVU7Hr1G103420	100-200	Histone-lysine N-methyltransferase 2A
539		Chr7	HORVU7Hr1G103430	100-200	undescribed protein
540		Chr7	HORVU7Hr1G103440	100-200	undescribed protein
541		Chr7	HORVU7Hr1G103450	100-200	undescribed protein
542		Chr7	HORVU7Hr1G103460	100-200	undescribed protein
543		Chr7	HORVU7Hr1G103470	100-200	undescribed protein
544		Chr7	HORVU7Hr1G103480	100-200	Retrotransposon protein, putative, Ty1-copia subclass, expressed
545		Chr7	HORVU7Hr1G103490	100-200	D.melanogaster polytene
546		Chr7	HORVU7Hr1G103500	0-100	undescribed protein
547		Chr7	HORVU7Hr1G103510	0-100	Transducin/WD40 repeat-like superfamily protein	1.27207
548		Chr7	HORVU7Hr1G103520	0-100	undescribed protein
549		Chr7	HORVU7Hr1G103530	0-100	undescribed protein
550		Chr7	HORVU7Hr1G103540	0-100	undescribed protein
551		Chr7	HORVU7Hr1G103560	0-100	D.melanogaster polytene
552		Chr7	HORVU7Hr1G103550	0-100	Polyubiquitin
553		Chr7	HORVU7Hr1G103570	0-100	undescribed protein
554		Chr7	HORVU7Hr1G103580	0-100	undescribed protein
555		Chr7	HORVU7Hr1G103590	0-100	undescribed protein
556		Chr7	HORVU7Hr1G103600	0-100	General transcription factor 2-related zinc finger protein
557		Chr7	HORVU7Hr1G103610	0-100	undescribed protein
558		Chr7	HORVU7Hr1G103620	0-100	undescribed protein
559		Chr7	HORVU7Hr1G103630	0-100	undescribed protein
560		Chr7	HORVU7Hr1G103640	0-100	undescribed protein
561		Chr7	HORVU7Hr1G103650	0-100	undescribed protein
562		Chr7	HORVU7Hr1G103660	0-100	undescribed protein		-1.59709	-1.90623		-1.75648
563		Chr7	HORVU7Hr1G103670	0-100	undescribed protein
564		Chr7	HORVU7Hr1G103680	0-100	undescribed protein
565		Chr7	HORVU7Hr1G103690	0-100	unknown function
566		Chr7	HORVU7Hr1G103700	100-200	unknown function
567		Chr7	HORVU7Hr1G103710	100-200	unknown function
568		Chr7	HORVU7Hr1G103720	100-200	undescribed protein
569		Chr7	HORVU7Hr1G103730	100-200	undescribed protein
570		Chr7	HORVU7Hr1G103740	100-200	undescribed protein
571		Chr7	HORVU7Hr1G103750	100-200	undescribed protein
572		Chr7	HORVU7Hr1G103760	100-200	undescribed protein
573		Chr7	HORVU7Hr1G103770	100-200	undescribed protein
574		Chr7	HORVU7Hr1G103780	100-200	undescribed protein
575		Chr7	HORVU7Hr1G103790	100-200	undescribed protein
576		Chr7	HORVU7Hr1G103800	100-200	Helicase-like protein
577		Chr7	HORVU7Hr1G103810	100-200	Helicase-like protein
578		Chr7	HORVU7Hr1G103820	200-300	undescribed protein
579		Chr7	HORVU7Hr1G103830	200-300	undescribed protein
580		Chr7	HORVU7Hr1G103840	200-300	undescribed protein
581		Chr7	HORVU7Hr1G103850	200-300	Kinesin-like protein
582		Chr7	HORVU7Hr1G103860	200-300	undescribed protein
583		Chr7	HORVU7Hr1G103870	200-300	carbonic anhydrase 2	-1.19637	-1.88389	-2.04701		-1.73053	-2.1509
584		Chr7	HORVU7Hr1G103880	200-300	unknown function
585		Chr7	HORVU7Hr1G103890	200-300	undescribed protein
586		Chr7	HORVU7Hr1G103900	200-300	undescribed protein
587		Chr7	HORVU7Hr1G103910	200-300	undescribed protein
588		Chr7	HORVU7Hr1G103920	200-300	undescribed protein
589		Chr7	HORVU7Hr1G103930	200-300	undescribed protein
590		Chr7	HORVU7Hr1G103940	200-300	undescribed protein
591		Chr7	HORVU7Hr1G103950	200-300	undescribed protein	-3.26662	-4.39026
592		Chr7	HORVU7Hr1G103960	200-300	undescribed protein
593		Chr7	HORVU7Hr1G103970	200-300	undescribed protein
594		Chr7	HORVU7Hr1G103980	300-400	unknown function
595		Chr7	HORVU7Hr1G103990	300-400	DNA helicase
596		Chr7	HORVU7Hr1G104000	300-400	undescribed protein
597		Chr7	HORVU7Hr1G104010	300-400	undescribed protein
598		Chr7	HORVU7Hr1G104020	300-400	undescribed protein
599		Chr7	HORVU7Hr1G104030	300-400	undescribed protein
600		Chr7	HORVU7Hr1G104040	300-400	undescribed protein
601		Chr7	HORVU7Hr1G104050	300-400	undescribed protein
602		Chr7	HORVU7Hr1G104060	300-400	undescribed protein
603		Chr7	HORVU7Hr1G104070	300-400	Myosin-2 heavy chain
604		Chr7	HORVU7Hr1G104080	300-400	undescribed protein
605		Chr7	HORVU7Hr1G104090	300-400	unknown function	-2.84343		-3.28496
606		Chr7	HORVU7Hr1G104100	300-400	undescribed protein
607		Chr7	HORVU7Hr1G104110	300-400	unknown function
608		Chr7	HORVU7Hr1G104120	300-400	undescribed protein
609		Chr7	HORVU7Hr1G104130	400-500	undescribed protein
610		Chr7	HORVU7Hr1G104140	400-500	undescribed protein
611		Chr7	HORVU7Hr1G104150	400-500	Myosin-2 heavy chain
612		Chr7	HORVU7Hr1G104160	400-500	undescribed protein
613		Chr7	HORVU7Hr1G104170	400-500	undescribed protein
614		Chr7	HORVU7Hr1G104180	400-500	early nodulin-like protein 9	2.0215		2.2614	2.67874	1.68884	3.05695
615		Chr7	HORVU7Hr1G104190	400-500	undescribed protein	2.29601		2.43998	2.66498	1.44384	2.7979
616		Chr7	HORVU7Hr1G104200	400-500	FAR1-related sequence 5
C3h vs C0 (CM72-3h vs. CM72-0h), C12h vs C0 (CM72-12h vs. CM72-0h), C48h vs C0 (CM72-48h vs. CM72-0h); G3h vs G0 (Gairdner-3h vs. Gairdner-0h), G12h vs G0 (Gairdner-12h vs. Gairdner-0h), G48h vs G0 (Gairdner-48h vs. Gairdner-0h).
Yellow highlights represent candidate genes in the peak regions of Chr4, Chr6 and Chr7.
