# Supplementary material for: Integrated GWAS and transcriptomic analysis reveal the candidate salt-responding genes regulating Na+/K+ balance in barley (Hordeum vulgare L.)
Source: Front Plant Sci. 2023 Jan 20;13:1004477. doi: 10.3389/fpls.2022.1004477 (PMC9910287; doi:10.3389/fpls.2022.1004477)
Supplement: Supplementary file 6 [file Table_6.xls]

## Sheet: Table S6
Supplementary Table 6 KEGG pathway and Gene Ontology analysis of all candidate genes with salt-tolerance related traits.
Database	#Term	ID	Input number	Background number	Fold Enrichment	P value	Input
PANTHER Pathways	Alanine biosynthesis	P02724	1	4	35.78	0.0342	HORVU4Hr1G087100
PANTHER Pathways	Tetrahydrofolate biosynthesis	P02742	1	6	23.85	0.0476	HORVU4Hr1G088440
PANTHER Pathways	Valine biosynthesis	P02785	1	7	20.44	0.0542	HORVU4Hr1G087100
PANTHER Pathways	Leucine biosynthesis	P02749	1	8	17.89	0.0608	HORVU4Hr1G087100
PANTHER Pathways	Isoleucine biosynthesis	P02748	1	8	17.89	0.0608	HORVU4Hr1G087100
PANTHER Pathways	Formyltetrahydrofolate biosynthesis	P02743	1	8	17.89	0.0608	HORVU4Hr1G088440
PANTHER Pathways	Huntington disease	P00029	3	51	8.42	0.00631	HORVU4Hr1G088610|HORVU4Hr1G087740|HORVU6Hr1G016100
PANTHER Pathways	Cytoskeletal regulation by Rho GTPase	P00016	1	24	5.96	0.16	HORVU4Hr1G087740
PANTHER Pathways	De novo purine biosynthesis	P02738	1	26	5.5	0.171	HORVU4Hr1G088440
Gene Ontology	#Term	ID	Input number	Background number	Fold Enrichment	P-Value	Input	FDR	Hyperlink
cellular_component	NADH dehydrogenase complex	GO:0030964	3	67	6.41	0.0128	HORVU6Hr1G064590|HORVU6Hr1G015900|HORVU6Hr1G063790	1	http://amigo.geneontology.org/amigo/term/GO:0030964
cellular_component	autophagosome membrane	GO:0000421	1	2	71.55	0.0207	HORVU5Hr1G094540	1	http://amigo.geneontology.org/amigo/term/GO:0000421
cellular_component	mitochondrial membrane	GO:0031966	6	353	2.43	0.04	HORVU7Hr1G101500|HORVU6Hr1G064010|HORVU6Hr1G064590|HORVU4Hr1G088470|HORVU6Hr1G015900|HORVU6Hr1G063790	1	http://amigo.geneontology.org/amigo/term/GO:0031966
cellular_component	mitochondrial envelope	GO:0005740	6	365	2.35	0.0457	HORVU7Hr1G101500|HORVU6Hr1G064010|HORVU6Hr1G064590|HORVU4Hr1G088470|HORVU6Hr1G015900|HORVU6Hr1G063790	1	http://amigo.geneontology.org/amigo/term/GO:0005740
cellular_component	transcription factor TFIIH core complex	GO:0000439	1	6	23.85	0.0476	HORVU4Hr1G088690	1	http://amigo.geneontology.org/amigo/term/GO:0000439
cellular_component	GID complex	GO:0034657	1	6	23.85	0.0476	HORVU6Hr1G064450	1	http://amigo.geneontology.org/amigo/term/GO:0034657
cellular_component	plastid	GO:0009536	2	1020	0.28	0.0529	HORVU6Hr1G016070|HORVU5Hr1G125110	1	http://amigo.geneontology.org/amigo/term/GO:0009536
cellular_component	tRNA methyltransferase complex	GO:0043527	1	7	20.44	0.0542	HORVU5Hr1G094580	1	http://amigo.geneontology.org/amigo/term/GO:0043527
cellular_component	mitochondrial respiratory chain complex I	GO:0005747	2	53	5.4	0.056	HORVU6Hr1G015900|HORVU6Hr1G063790	1	http://amigo.geneontology.org/amigo/term/GO:0005747
cellular_component	integral component of membrane	GO:0016021	59	6706	1.26	0.061	HORVU2Hr1G002840|HORVU2Hr1G002630|HORVU2Hr1G002650|HORVU2Hr1G002750|HORVU2Hr1G002830|HORVU2Hr1G091220|HORVU2Hr1G091230|HORVU2Hr1G091290|HORVU2Hr1G091360|HORVU4Hr1G087050|HORVU4Hr1G087070|HORVU4Hr1G087110|HORVU4Hr1G087220|HORVU4Hr1G087350|HORVU4Hr1G087560|HORVU4Hr1G087630|HORVU4Hr1G087650|HORVU4Hr1G087670|HORVU4Hr1G087720|HORVU4Hr1G087840|HORVU4Hr1G087960|HORVU4Hr1G088020|HORVU4Hr1G088090|HORVU4Hr…	1	http://amigo.geneontology.org/amigo/term/GO:0016021
cellular_component	mitochondrial inner membrane	GO:0005743	5	300	2.39	0.0623	HORVU7Hr1G101500|HORVU6Hr1G064010|HORVU4Hr1G088470|HORVU6Hr1G015900|HORVU6Hr1G063790	1	http://amigo.geneontology.org/amigo/term/GO:0005743
cellular_component	intrinsic component of membrane	GO:0031224	60	6858	1.25	0.0632	HORVU2Hr1G002840|HORVU2Hr1G002630|HORVU2Hr1G002650|HORVU2Hr1G002750|HORVU2Hr1G002830|HORVU2Hr1G091220|HORVU2Hr1G091230|HORVU2Hr1G091290|HORVU2Hr1G091360|HORVU4Hr1G087050|HORVU4Hr1G087070|HORVU4Hr1G087110|HORVU4Hr1G087220|HORVU4Hr1G087350|HORVU4Hr1G087560|HORVU4Hr1G087630|HORVU4Hr1G087650|HORVU4Hr1G087670|HORVU4Hr1G087720|HORVU4Hr1G087840|HORVU4Hr1G087960|HORVU4Hr1G088020|HORVU4Hr1G088090|HORVU4Hr…	1	http://amigo.geneontology.org/amigo/term/GO:0031224
cellular_component	respiratory chain complex I	GO:0045271	2	57	5.02	0.0634	HORVU6Hr1G015900|HORVU6Hr1G063790	1	http://amigo.geneontology.org/amigo/term/GO:0045271
cellular_component	mediator complex	GO:0016592	2	59	4.85	0.0672	HORVU5Hr1G125050|HORVU4Hr1G087360	1	http://amigo.geneontology.org/amigo/term/GO:0016592
cellular_component	organelle inner membrane	GO:0019866	5	321	2.23	0.0778	HORVU7Hr1G101500|HORVU6Hr1G064010|HORVU4Hr1G088470|HORVU6Hr1G015900|HORVU6Hr1G063790	1	http://amigo.geneontology.org/amigo/term/GO:0019866
cellular_component	autophagosome	GO:0005776	1	11	13.01	0.0802	HORVU5Hr1G094540	1	http://amigo.geneontology.org/amigo/term/GO:0005776
cellular_component	respirasome	GO:0070469	3	142	3.02	0.0804	HORVU6Hr1G064590|HORVU6Hr1G015900|HORVU6Hr1G063790	1	http://amigo.geneontology.org/amigo/term/GO:0070469
cellular_component	transcription factor TFIIH holo complex	GO:0005675	1	12	11.93	0.0866	HORVU4Hr1G088690	1	http://amigo.geneontology.org/amigo/term/GO:0005675
cellular_component	oxidoreductase complex	GO:1990204	3	157	2.73	0.101	HORVU6Hr1G064590|HORVU6Hr1G015900|HORVU6Hr1G063790	1	http://amigo.geneontology.org/amigo/term/GO:1990204
cellular_component	membrane	GO:0016020	68	8213	1.18	0.113	HORVU2Hr1G002840|HORVU5Hr1G124800|HORVU6Hr1G064620|HORVU6Hr1G063800|HORVU5Hr1G094540|HORVU5Hr1G124980|HORVU4Hr1G088060|HORVU5Hr1G124880|HORVU5Hr1G094490|HORVU6Hr1G016070|HORVU4Hr1G087720|HORVU4Hr1G087070|HORVU4Hr1G087110|HORVU4Hr1G088090|HORVU6Hr1G064170|HORVU4Hr1G088410|HORVU6Hr1G015630|HORVU6Hr1G064190|HORVU4Hr1G088580|HORVU4Hr1G088600|HORVU7Hr1G101590|HORVU5Hr1G094410|HORVU5Hr1G124810|HORVU4Hr…	1	http://amigo.geneontology.org/amigo/term/GO:0016020
cellular_component	CCR4-NOT core complex	GO:0030015	1	17	8.42	0.118	HORVU4Hr1G088210	1	http://amigo.geneontology.org/amigo/term/GO:0030015
cellular_component	carboxy-terminal domain protein kinase complex	GO:0032806	1	18	7.95	0.124	HORVU4Hr1G088690	1	http://amigo.geneontology.org/amigo/term/GO:0032806
cellular_component	chloroplast	GO:0009507	2	827	0.35	0.136	HORVU6Hr1G016070|HORVU5Hr1G125110	1	http://amigo.geneontology.org/amigo/term/GO:0009507
cellular_component	methyltransferase complex	GO:0034708	1	21	6.81	0.142	HORVU5Hr1G094580	1	http://amigo.geneontology.org/amigo/term/GO:0034708
cellular_component	transmembrane transporter complex	GO:1902495	2	94	3.04	0.144	HORVU6Hr1G015900|HORVU6Hr1G063790	1	http://amigo.geneontology.org/amigo/term/GO:1902495
cellular_component	RNA polymerase II transcription regulator complex	GO:0090575	2	95	3.01	0.146	HORVU4Hr1G087580|HORVU4Hr1G088690	1	http://amigo.geneontology.org/amigo/term/GO:0090575
cellular_component	endoplasmic reticulum-Golgi intermediate compartment	GO:0005793	1	22	6.5	0.148	HORVU5Hr1G094410	1	http://amigo.geneontology.org/amigo/term/GO:0005793
cellular_component	CCR4-NOT complex	GO:0030014	1	24	5.96	0.16	HORVU4Hr1G088210	1	http://amigo.geneontology.org/amigo/term/GO:0030014
cellular_component	transporter complex	GO:1990351	2	102	2.81	0.163	HORVU6Hr1G015900|HORVU6Hr1G063790	1	http://amigo.geneontology.org/amigo/term/GO:1990351
cellular_component	organelle envelope	GO:0031967	8	708	1.62	0.167	HORVU7Hr1G101390|HORVU6Hr1G016070|HORVU7Hr1G101500|HORVU6Hr1G064010|HORVU6Hr1G064590|HORVU4Hr1G088470|HORVU6Hr1G015900|HORVU6Hr1G063790	1	http://amigo.geneontology.org/amigo/term/GO:0031967
cellular_component	envelope	GO:0031975	8	708	1.62	0.167	HORVU7Hr1G101390|HORVU6Hr1G016070|HORVU7Hr1G101500|HORVU6Hr1G064010|HORVU6Hr1G064590|HORVU4Hr1G088470|HORVU6Hr1G015900|HORVU6Hr1G063790	1	http://amigo.geneontology.org/amigo/term/GO:0031975
cellular_component	COPI vesicle coat	GO:0030126	1	27	5.3	0.177	HORVU4Hr1G088390	1	http://amigo.geneontology.org/amigo/term/GO:0030126
cellular_component	COPI-coated vesicle membrane	GO:0030137	1	27	5.3	0.177	HORVU4Hr1G088390	1	http://amigo.geneontology.org/amigo/term/GO:0030137
cellular_component	COPI-coated vesicle	GO:0030663	1	27	5.3	0.177	HORVU4Hr1G088390	1	http://amigo.geneontology.org/amigo/term/GO:0030663
cellular_component	ribonucleoprotein complex	GO:1990904	2	767	0.37	0.185	HORVU6Hr1G016260|HORVU4Hr1G087880	1	http://amigo.geneontology.org/amigo/term/GO:1990904
cellular_component	ribosome	GO:0005840	1	558	0.26	0.194	HORVU4Hr1G087880	1	http://amigo.geneontology.org/amigo/term/GO:0005840
cellular_component	mitochondrial respirasome	GO:0005746	2	115	2.49	0.195	HORVU6Hr1G015900|HORVU6Hr1G063790	1	http://amigo.geneontology.org/amigo/term/GO:0005746
cellular_component	respiratory chain complex	GO:0098803	2	117	2.45	0.2	HORVU6Hr1G015900|HORVU6Hr1G063790	1	http://amigo.geneontology.org/amigo/term/GO:0098803
cellular_component	coated vesicle	GO:0030135	2	124	2.31	0.218	HORVU5Hr1G094410|HORVU4Hr1G088390	1	http://amigo.geneontology.org/amigo/term/GO:0030135
cellular_component	intracellular non-membrane-bounded organelle	GO:0043232	7	1611	0.62	0.222	HORVU4Hr1G087880|HORVU7Hr1G103420|HORVU4Hr1G088210|HORVU4Hr1G087850|HORVU4Hr1G087740|HORVU6Hr1G063900|HORVU5Hr1G094500|HORVU6Hr1G016260	1	http://amigo.geneontology.org/amigo/term/GO:0043232
cellular_component	non-membrane-bounded organelle	GO:0043228	7	1611	0.62	0.222	HORVU4Hr1G087880|HORVU7Hr1G103420|HORVU4Hr1G088210|HORVU4Hr1G087850|HORVU4Hr1G087740|HORVU6Hr1G063900|HORVU5Hr1G094500|HORVU6Hr1G016260	1	http://amigo.geneontology.org/amigo/term/GO:0043228
cellular_component	P-body	GO:0000932	1	35	4.09	0.222	HORVU4Hr1G088210	1	http://amigo.geneontology.org/amigo/term/GO:0000932
cellular_component	integral component of mitochondrial inner membrane	GO:0031305	1	39	3.67	0.243	HORVU4Hr1G088470	1	http://amigo.geneontology.org/amigo/term/GO:0031305
cellular_component	cytoplasmic ribonucleoprotein granule	GO:0036464	1	41	3.49	0.254	HORVU4Hr1G088210	1	http://amigo.geneontology.org/amigo/term/GO:0036464
cellular_component	intrinsic component of mitochondrial inner membrane	GO:0031304	1	41	3.49	0.254	HORVU4Hr1G088470	1	http://amigo.geneontology.org/amigo/term/GO:0031304
cellular_component	transcription regulator complex	GO:0005667	2	139	2.06	0.256	HORVU4Hr1G087580|HORVU4Hr1G088690	1	http://amigo.geneontology.org/amigo/term/GO:0005667
cellular_component	ribonucleoprotein granule	GO:0035770	1	42	3.41	0.259	HORVU4Hr1G088210	1	http://amigo.geneontology.org/amigo/term/GO:0035770
cellular_component	endoplasmic reticulum	GO:0005783	8	756	1.51	0.262	HORVU6Hr1G016080|HORVU4Hr1G087650|HORVU7Hr1G103510|HORVU2Hr1G091230|HORVU2Hr1G091220|HORVU5Hr1G094410|HORVU7Hr1G101310|HORVU6Hr1G064230	1	http://amigo.geneontology.org/amigo/term/GO:0005783
cellular_component	SNARE complex	GO:0031201	1	43	3.33	0.264	HORVU2Hr1G091230	1	http://amigo.geneontology.org/amigo/term/GO:0031201
cellular_component	protein-containing complex	GO:0032991	17	3209	0.76	0.266	HORVU2Hr1G091230|HORVU4Hr1G087360|HORVU4Hr1G087580|HORVU4Hr1G087850|HORVU4Hr1G087880|HORVU4Hr1G088210|HORVU4Hr1G088390|HORVU4Hr1G088660|HORVU4Hr1G088690|HORVU5Hr1G094500|HORVU5Hr1G094580|HORVU5Hr1G125050|HORVU6Hr1G015900|HORVU6Hr1G016260|HORVU6Hr1G063790|HORVU6Hr1G064450|HORVU6Hr1G064590|HORVU7Hr1G101390	1	http://amigo.geneontology.org/amigo/term/GO:0032991
cellular_component	nuclear pore	GO:0005643	1	47	3.04	0.284	HORVU7Hr1G101390	1	http://amigo.geneontology.org/amigo/term/GO:0005643
cellular_component	Golgi-associated vesicle membrane	GO:0030660	1	49	2.92	0.294	HORVU4Hr1G088390	1	http://amigo.geneontology.org/amigo/term/GO:0030660
cellular_component	Golgi-associated vesicle	GO:0005798	1	50	2.86	0.299	HORVU4Hr1G088390	1	http://amigo.geneontology.org/amigo/term/GO:0005798
cellular_component	endoplasmic reticulum membrane	GO:0005789	4	336	1.7	0.304	HORVU4Hr1G087650|HORVU7Hr1G103510|HORVU2Hr1G091230|HORVU6Hr1G064230	1	http://amigo.geneontology.org/amigo/term/GO:0005789
cellular_component	nuclear outer membrane-endoplasmic reticulum membrane network	GO:0042175	4	336	1.7	0.304	HORVU4Hr1G087650|HORVU7Hr1G103510|HORVU2Hr1G091230|HORVU6Hr1G064230	1	http://amigo.geneontology.org/amigo/term/GO:0042175
cellular_component	COPII-coated ER to Golgi transport vesicle	GO:0030134	1	53	2.7	0.314	HORVU5Hr1G094410	1	http://amigo.geneontology.org/amigo/term/GO:0030134
cellular_component	integral component of mitochondrial membrane	GO:0032592	1	53	2.7	0.314	HORVU4Hr1G088470	1	http://amigo.geneontology.org/amigo/term/GO:0032592
cellular_component	endoplasmic reticulum subcompartment	GO:0098827	4	349	1.64	0.315	HORVU4Hr1G087650|HORVU7Hr1G103510|HORVU2Hr1G091230|HORVU6Hr1G064230	1	http://amigo.geneontology.org/amigo/term/GO:0098827
cellular_component	small-subunit processome	GO:0032040	1	54	2.65	0.318	HORVU6Hr1G016260	1	http://amigo.geneontology.org/amigo/term/GO:0032040
cellular_component	integral component of organelle membrane	GO:0031301	2	165	1.73	0.323	HORVU7Hr1G103510|HORVU4Hr1G088470	1	http://amigo.geneontology.org/amigo/term/GO:0031301
cellular_component	intrinsic component of mitochondrial membrane	GO:0098573	1	55	2.6	0.323	HORVU4Hr1G088470	1	http://amigo.geneontology.org/amigo/term/GO:0098573
cellular_component	intrinsic component of organelle membrane	GO:0031300	2	170	1.68	0.335	HORVU7Hr1G103510|HORVU4Hr1G088470	1	http://amigo.geneontology.org/amigo/term/GO:0031300
cellular_component	organelle	GO:0043226	58	9306	0.89	0.347	HORVU2Hr1G091220|HORVU2Hr1G091230|HORVU2Hr1G091280|HORVU4Hr1G087110|HORVU4Hr1G087200|HORVU4Hr1G087360|HORVU4Hr1G087520|HORVU4Hr1G087580|HORVU4Hr1G087590|HORVU4Hr1G087610|HORVU4Hr1G087650|HORVU4Hr1G087670|HORVU4Hr1G087680|HORVU4Hr1G087700|HORVU4Hr1G087740|HORVU4Hr1G087750|HORVU4Hr1G087850|HORVU4Hr1G087880|HORVU4Hr1G088010|HORVU4Hr1G088060|HORVU4Hr1G088210|HORVU4Hr1G088390|HORVU4Hr1G088470|HORVU4Hr…	1	http://amigo.geneontology.org/amigo/term/GO:0043226
cellular_component	intracellular organelle	GO:0043229	58	9304	0.89	0.347	HORVU2Hr1G091220|HORVU2Hr1G091230|HORVU2Hr1G091280|HORVU4Hr1G087110|HORVU4Hr1G087200|HORVU4Hr1G087360|HORVU4Hr1G087520|HORVU4Hr1G087580|HORVU4Hr1G087590|HORVU4Hr1G087610|HORVU4Hr1G087650|HORVU4Hr1G087670|HORVU4Hr1G087680|HORVU4Hr1G087700|HORVU4Hr1G087740|HORVU4Hr1G087750|HORVU4Hr1G087850|HORVU4Hr1G087880|HORVU4Hr1G088010|HORVU4Hr1G088060|HORVU4Hr1G088210|HORVU4Hr1G088390|HORVU4Hr1G088470|HORVU4Hr…	1	http://amigo.geneontology.org/amigo/term/GO:0043229
cellular_component	nuclear envelope	GO:0005635	1	65	2.2	0.369	HORVU7Hr1G101390	1	http://amigo.geneontology.org/amigo/term/GO:0005635
cellular_component	integral component of endoplasmic reticulum membrane	GO:0030176	1	66	2.17	0.373	HORVU7Hr1G103510	1	http://amigo.geneontology.org/amigo/term/GO:0030176
cellular_component	vesicle coat	GO:0030120	1	69	2.07	0.386	HORVU4Hr1G088390	1	http://amigo.geneontology.org/amigo/term/GO:0030120
cellular_component	intrinsic component of endoplasmic reticulum membrane	GO:0031227	1	69	2.07	0.386	HORVU7Hr1G103510	1	http://amigo.geneontology.org/amigo/term/GO:0031227
cellular_component	inner mitochondrial membrane protein complex	GO:0098800	2	196	1.46	0.4	HORVU6Hr1G015900|HORVU6Hr1G063790	1	http://amigo.geneontology.org/amigo/term/GO:0098800
cellular_component	coated vesicle membrane	GO:0030662	1	84	1.7	0.447	HORVU4Hr1G088390	1	http://amigo.geneontology.org/amigo/term/GO:0030662
cellular_component	membrane coat	GO:0030117	1	84	1.7	0.447	HORVU4Hr1G088390	1	http://amigo.geneontology.org/amigo/term/GO:0030117
cellular_component	coated membrane	GO:0048475	1	84	1.7	0.447	HORVU4Hr1G088390	1	http://amigo.geneontology.org/amigo/term/GO:0048475
cellular_component	serine/threonine protein kinase complex	GO:1902554	1	84	1.7	0.447	HORVU4Hr1G088690	1	http://amigo.geneontology.org/amigo/term/GO:1902554
cellular_component	bounding membrane of organelle	GO:0098588	2	573	0.5	0.448	HORVU5Hr1G094540|HORVU4Hr1G088390	1	http://amigo.geneontology.org/amigo/term/GO:0098588
cellular_component	intracellular anatomical structure	GO:0005622	71	11026	0.92	0.449	HORVU4Hr1G088720|HORVU2Hr1G091200|HORVU2Hr1G091220|HORVU2Hr1G091230|HORVU2Hr1G091280|HORVU2Hr1G091370|HORVU4Hr1G087110|HORVU4Hr1G087120|HORVU4Hr1G087200|HORVU4Hr1G087360|HORVU4Hr1G087520|HORVU4Hr1G087580|HORVU4Hr1G087590|HORVU4Hr1G087610|HORVU4Hr1G087650|HORVU4Hr1G087670|HORVU4Hr1G087680|HORVU4Hr1G087700|HORVU4Hr1G087740|HORVU4Hr1G087750|HORVU4Hr1G087850|HORVU4Hr1G087880|HORVU4Hr1G088010|HORVU4Hr…	1	http://amigo.geneontology.org/amigo/term/GO:0005622
cellular_component	RNA polymerase II, holoenzyme	GO:0016591	1	93	1.54	0.481	HORVU4Hr1G088690	1	http://amigo.geneontology.org/amigo/term/GO:0016591
cellular_component	protein kinase complex	GO:1902911	1	94	1.52	0.484	HORVU4Hr1G088690	1	http://amigo.geneontology.org/amigo/term/GO:1902911
cellular_component	organelle membrane	GO:0031090	12	1411	1.22	0.511	HORVU4Hr1G087650|HORVU7Hr1G103510|HORVU2Hr1G091230|HORVU7Hr1G101500|HORVU5Hr1G094540|HORVU6Hr1G064590|HORVU4Hr1G088390|HORVU6Hr1G015900|HORVU6Hr1G064230|HORVU6Hr1G064010|HORVU6Hr1G063790|HORVU4Hr1G088470	1	http://amigo.geneontology.org/amigo/term/GO:0031090
cellular_component	vacuolar membrane	GO:0005774	1	103	1.39	0.516	HORVU5Hr1G094540	1	http://amigo.geneontology.org/amigo/term/GO:0005774
cellular_component	preribosome	GO:0030684	1	104	1.38	0.519	HORVU6Hr1G016260	1	http://amigo.geneontology.org/amigo/term/GO:0030684
cellular_component	ribosomal subunit	GO:0044391	1	382	0.37	0.53	HORVU4Hr1G087880/HORVU4Hr1G087850	1	http://amigo.geneontology.org/amigo/term/GO:0044391
cellular_component	peroxisome	GO:0005777	1	115	1.24	0.555	HORVU7Hr1G101500	1	http://amigo.geneontology.org/amigo/term/GO:0005777
cellular_component	microbody	GO:0042579	1	115	1.24	0.555	HORVU7Hr1G101500	1	http://amigo.geneontology.org/amigo/term/GO:0042579
cellular_component	cytosol	GO:0005829	9	1059	1.22	0.571	HORVU5Hr1G124750|HORVU6Hr1G016080|HORVU6Hr1G063860|HORVU4Hr1G087880|HORVU6Hr1G063910|HORVU5Hr1G094580|HORVU4Hr1G087850|HORVU4Hr1G088610|HORVU6Hr1G063830|HORVU4Hr1G088060	1	http://amigo.geneontology.org/amigo/term/GO:0005829
cellular_component	cell periphery	GO:0071944	11	1928	0.82	0.575	HORVU2Hr1G002840|HORVU2Hr1G002750|HORVU5Hr1G124810|HORVU4Hr1G087650|HORVU2Hr1G091360|HORVU4Hr1G087960|HORVU4Hr1G087720|HORVU6Hr1G064140|HORVU7Hr1G104180|HORVU6Hr1G064220|HORVU2Hr1G091090	1	http://amigo.geneontology.org/amigo/term/GO:0071944
cellular_component	nuclear DNA-directed RNA polymerase complex	GO:0055029	1	127	1.13	0.591	HORVU4Hr1G088690	1	http://amigo.geneontology.org/amigo/term/GO:0055029
cellular_component	chloroplast envelope	GO:0009941	1	128	1.12	0.593	HORVU6Hr1G016070	1	http://amigo.geneontology.org/amigo/term/GO:0009941
cellular_component	DNA-directed RNA polymerase complex	GO:0000428	1	138	1.04	0.621	HORVU4Hr1G088690	1	http://amigo.geneontology.org/amigo/term/GO:0000428
cellular_component	cytoplasm	GO:0005737	44	6815	0.92	0.627	HORVU2Hr1G091200|HORVU2Hr1G091220|HORVU2Hr1G091230|HORVU2Hr1G091280|HORVU2Hr1G091370|HORVU4Hr1G087120|HORVU4Hr1G087650|HORVU4Hr1G087680|HORVU4Hr1G087740|HORVU4Hr1G087850|HORVU4Hr1G087880|HORVU4Hr1G088060|HORVU4Hr1G088210|HORVU4Hr1G088390|HORVU4Hr1G088470|HORVU4Hr1G088610|HORVU4Hr1G088660|HORVU5Hr1G094410|HORVU5Hr1G094420|HORVU5Hr1G094540|HORVU5Hr1G094580|HORVU5Hr1G124750|HORVU5Hr1G124770|HORVU5Hr…	1	http://amigo.geneontology.org/amigo/term/GO:0005737
cellular_component	Golgi apparatus	GO:0005794	3	700	0.61	0.641	HORVU2Hr1G091280|HORVU5Hr1G094410|HORVU4Hr1G088390	1	http://amigo.geneontology.org/amigo/term/GO:0005794
cellular_component	membrane-bounded organelle	GO:0043227	56	8516	0.94	0.655	HORVU2Hr1G091220|HORVU2Hr1G091230|HORVU2Hr1G091280|HORVU4Hr1G087110|HORVU4Hr1G087200|HORVU4Hr1G087360|HORVU4Hr1G087520|HORVU4Hr1G087580|HORVU4Hr1G087590|HORVU4Hr1G087610|HORVU4Hr1G087650|HORVU4Hr1G087670|HORVU4Hr1G087680|HORVU4Hr1G087700|HORVU4Hr1G087750|HORVU4Hr1G088010|HORVU4Hr1G088060|HORVU4Hr1G088210|HORVU4Hr1G088390|HORVU4Hr1G088470|HORVU4Hr1G088540|HORVU4Hr1G088690|HORVU4Hr1G088720|HORVU5Hr…	1	http://amigo.geneontology.org/amigo/term/GO:0043227
cellular_component	intracellular membrane-bounded organelle	GO:0043231	56	8499	0.94	0.655	HORVU2Hr1G091220|HORVU2Hr1G091230|HORVU2Hr1G091280|HORVU4Hr1G087110|HORVU4Hr1G087200|HORVU4Hr1G087360|HORVU4Hr1G087520|HORVU4Hr1G087580|HORVU4Hr1G087590|HORVU4Hr1G087610|HORVU4Hr1G087650|HORVU4Hr1G087670|HORVU4Hr1G087680|HORVU4Hr1G087700|HORVU4Hr1G087750|HORVU4Hr1G088010|HORVU4Hr1G088060|HORVU4Hr1G088210|HORVU4Hr1G088390|HORVU4Hr1G088470|HORVU4Hr1G088540|HORVU4Hr1G088690|HORVU4Hr1G088720|HORVU5Hr…	1	http://amigo.geneontology.org/amigo/term/GO:0043231
cellular_component	intracellular organelle lumen	GO:0070013	4	809	0.71	0.668	HORVU4Hr1G088690|HORVU4Hr1G087680|HORVU6Hr1G063900|HORVU6Hr1G016260	1	http://amigo.geneontology.org/amigo/term/GO:0070013
cellular_component	organelle lumen	GO:0043233	4	809	0.71	0.668	HORVU4Hr1G087680|HORVU6Hr1G063900|HORVU6Hr1G016260|HORVU4Hr1G088690	1	http://amigo.geneontology.org/amigo/term/GO:0043233
cellular_component	membrane-enclosed lumen	GO:0031974	4	809	0.71	0.668	HORVU4Hr1G087680|HORVU6Hr1G063900|HORVU6Hr1G016260|HORVU4Hr1G088690	1	http://amigo.geneontology.org/amigo/term/GO:0031974
cellular_component	chromatin	GO:0000785	2	240	1.19	0.686	HORVU7Hr1G103420|HORVU5Hr1G094500	1	http://amigo.geneontology.org/amigo/term/GO:0000785
cellular_component	nucleolus	GO:0005730	2	241	1.19	0.687	HORVU6Hr1G063900|HORVU6Hr1G016260	1	http://amigo.geneontology.org/amigo/term/GO:0005730
cellular_component	supramolecular complex	GO:0099080	2	253	1.13	0.698	HORVU4Hr1G088210|HORVU4Hr1G087740	1	http://amigo.geneontology.org/amigo/term/GO:0099080
cellular_component	vacuole	GO:0005773	2	258	1.11	0.703	HORVU5Hr1G094540|HORVU6Hr1G064230	1	http://amigo.geneontology.org/amigo/term/GO:0005773
cellular_component	intrinsic component of plasma membrane	GO:0031226	1	297	0.48	0.728	HORVU7Hr1G104180	1	http://amigo.geneontology.org/amigo/term/GO:0031226
cellular_component	plastid envelope	GO:0009526	1	295	0.49	0.728	HORVU6Hr1G016070	1	http://amigo.geneontology.org/amigo/term/GO:0009526
cellular_component	cytoskeleton	GO:0005856	1	320	0.45	0.731	HORVU4Hr1G087740	1	http://amigo.geneontology.org/amigo/term/GO:0005856
cellular_component	intracellular protein-containing complex	GO:0140535	4	539	1.06	0.793	HORVU4Hr1G088660|HORVU4Hr1G088210|HORVU6Hr1G064450|HORVU4Hr1G088690	1	http://amigo.geneontology.org/amigo/term/GO:0140535
cellular_component	cellular anatomical entity	GO:0110165	124	17402	1.02	0.799	HORVU2Hr1G002840|HORVU2Hr1G002630|HORVU2Hr1G002650|HORVU2Hr1G002750|HORVU2Hr1G002830|HORVU2Hr1G003110|HORVU2Hr1G091090|HORVU2Hr1G091200|HORVU2Hr1G091220|HORVU2Hr1G091230|HORVU2Hr1G091280|HORVU2Hr1G091290|HORVU2Hr1G091360|HORVU2Hr1G091370|HORVU4Hr1G087050|HORVU4Hr1G087070|HORVU4Hr1G087110|HORVU4Hr1G087120|HORVU4Hr1G087200|HORVU4Hr1G087220|HORVU4Hr1G087230|HORVU4Hr1G087350|HORVU4Hr1G087360|HORVU4Hr…	1	http://amigo.geneontology.org/amigo/term/GO:0110165
cellular_component	nuclear lumen	GO:0031981	3	590	0.73	0.803	HORVU6Hr1G063900|HORVU6Hr1G016260|HORVU4Hr1G088690	1	http://amigo.geneontology.org/amigo/term/GO:0031981
cellular_component	membrane protein complex	GO:0098796	5	710	1.01	0.822	HORVU2Hr1G091230|HORVU6Hr1G064590|HORVU4Hr1G088390|HORVU6Hr1G015900|HORVU6Hr1G063790	1	http://amigo.geneontology.org/amigo/term/GO:0098796
cellular_component	extracellular region	GO:0005576	6	805	1.07	0.829	HORVU4Hr1G087050|HORVU4Hr1G088110|HORVU4Hr1G087070|HORVU4Hr1G087990|HORVU4Hr1G088080|HORVU4Hr1G088160|HORVU4Hr1G088140	1	http://amigo.geneontology.org/amigo/term/GO:0005576
cellular_component	mitochondrion	GO:0005739	7	926	1.08	0.84	HORVU4Hr1G087680|HORVU7Hr1G101500|HORVU6Hr1G064590|HORVU6Hr1G015900|HORVU6Hr1G064010|HORVU6Hr1G063790|HORVU4Hr1G088470	1	http://amigo.geneontology.org/amigo/term/GO:0005739
cellular_component	nucleus	GO:0005634	31	4616	0.96	0.924	HORVU4Hr1G087200|HORVU4Hr1G087360|HORVU4Hr1G087520|HORVU4Hr1G087580|HORVU4Hr1G087590|HORVU4Hr1G087610|HORVU4Hr1G087700|HORVU4Hr1G087750|HORVU4Hr1G088010|HORVU4Hr1G088210|HORVU4Hr1G088540|HORVU4Hr1G088690|HORVU5Hr1G094500|HORVU5Hr1G094580|HORVU5Hr1G124750|HORVU5Hr1G124770|HORVU5Hr1G125050|HORVU6Hr1G015950|HORVU6Hr1G016200|HORVU6Hr1G016240|HORVU6Hr1G016250|HORVU6Hr1G016260|HORVU6Hr1G016290|HORVU6Hr…	1	http://amigo.geneontology.org/amigo/term/GO:0005634
cellular_component	anchored component of membrane	GO:0031225	1	208	0.69	1	HORVU7Hr1G104180	1	http://amigo.geneontology.org/amigo/term/GO:0031225
cellular_component	anchored component of plasma membrane	GO:0046658	1	200	0.72	1	HORVU7Hr1G104180	1	http://amigo.geneontology.org/amigo/term/GO:0046658
cellular_component	catalytic complex	GO:1902494	6	975	0.88	1	HORVU4Hr1G088660|HORVU5Hr1G094580|HORVU6Hr1G064590|HORVU6Hr1G015900|HORVU6Hr1G063790|HORVU4Hr1G088690	1	http://amigo.geneontology.org/amigo/term/GO:1902494
cellular_component	chromosome	GO:0005694	2	423	0.68	1	HORVU7Hr1G103420|HORVU5Hr1G094500	1	http://amigo.geneontology.org/amigo/term/GO:0005694
cellular_component	cytoplasmic vesicle	GO:0031410	2	328	0.87	1	HORVU5Hr1G094410|HORVU4Hr1G088390	1	http://amigo.geneontology.org/amigo/term/GO:0031410
cellular_component	cytoplasmic vesicle membrane	GO:0030659	1	147	0.97	1	HORVU4Hr1G088390	1	http://amigo.geneontology.org/amigo/term/GO:0030659
cellular_component	cytosolic large ribosomal subunit	GO:0022625	1	167	0.86	1	HORVU4Hr1G087880/HORVU4Hr1G087850	1	http://amigo.geneontology.org/amigo/term/GO:0022625
cellular_component	cytosolic ribosome	GO:0022626	1	259	0.55	1	HORVU4Hr1G087880/HORVU4Hr1G087850	1	http://amigo.geneontology.org/amigo/term/GO:0022626
cellular_component	DNA packaging complex	GO:0044815	1	153	0.94	1	HORVU5Hr1G094500	1	http://amigo.geneontology.org/amigo/term/GO:0044815
cellular_component	endomembrane system	GO:0012505	11	1584	0.99	1	HORVU6Hr1G016080|HORVU7Hr1G101390|HORVU2Hr1G091280|HORVU4Hr1G087650|HORVU7Hr1G103510|HORVU2Hr1G091230|HORVU2Hr1G091220|HORVU5Hr1G094410|HORVU7Hr1G101310|HORVU4Hr1G088390|HORVU6Hr1G064230	1	http://amigo.geneontology.org/amigo/term/GO:0012505
cellular_component	Golgi membrane	GO:0000139	1	256	0.56	1	HORVU4Hr1G088390	1	http://amigo.geneontology.org/amigo/term/GO:0000139
cellular_component	intracellular vesicle	GO:0097708	2	328	0.87	1	HORVU5Hr1G094410|HORVU4Hr1G088390	1	http://amigo.geneontology.org/amigo/term/GO:0097708
cellular_component	large ribosomal subunit	GO:0015934	1	234	0.61	1	HORVU4Hr1G087880/HORVU4Hr1G087850	1	http://amigo.geneontology.org/amigo/term/GO:0015934
cellular_component	microtubule	GO:0005874	1	186	0.77	1	HORVU4Hr1G087740	1	http://amigo.geneontology.org/amigo/term/GO:0005874
cellular_component	microtubule cytoskeleton	GO:0015630	1	208	0.69	1	HORVU4Hr1G087740	1	http://amigo.geneontology.org/amigo/term/GO:0015630
cellular_component	mitochondrial matrix	GO:0005759	1	178	0.8	1	HORVU4Hr1G087680	1	http://amigo.geneontology.org/amigo/term/GO:0005759
cellular_component	mitochondrial protein-containing complex	GO:0098798	2	306	0.94	1	HORVU6Hr1G015900|HORVU6Hr1G063790	1	http://amigo.geneontology.org/amigo/term/GO:0098798
cellular_component	nuclear protein-containing complex	GO:0140513	5	848	0.84	1	HORVU4Hr1G087580|HORVU7Hr1G101390|HORVU5Hr1G125050|HORVU4Hr1G088690|HORVU4Hr1G087360	1	http://amigo.geneontology.org/amigo/term/GO:0140513
cellular_component	nucleoplasm	GO:0005654	1	268	0.53	1	HORVU4Hr1G088690	1	http://amigo.geneontology.org/amigo/term/GO:0005654
cellular_component	nucleosome	GO:0000786	1	149	0.96	1	HORVU5Hr1G094500	1	http://amigo.geneontology.org/amigo/term/GO:0000786
cellular_component	organelle subcompartment	GO:0031984	4	664	0.86	1	HORVU4Hr1G087650|HORVU7Hr1G103510|HORVU2Hr1G091230|HORVU6Hr1G064230	1	http://amigo.geneontology.org/amigo/term/GO:0031984
cellular_component	plasma membrane	GO:0005886	11	1703	0.92	1	HORVU2Hr1G002840|HORVU2Hr1G002750|HORVU5Hr1G124810|HORVU4Hr1G087650|HORVU2Hr1G091360|HORVU4Hr1G087960|HORVU4Hr1G087720|HORVU6Hr1G064140|HORVU7Hr1G104180|HORVU6Hr1G064220|HORVU2Hr1G091090	1	http://amigo.geneontology.org/amigo/term/GO:0005886
cellular_component	polymeric cytoskeletal fiber	GO:0099513	1	191	0.75	1	HORVU4Hr1G087740	1	http://amigo.geneontology.org/amigo/term/GO:0099513
cellular_component	protein-DNA complex	GO:0032993	1	221	0.65	1	HORVU5Hr1G094500	1	http://amigo.geneontology.org/amigo/term/GO:0032993
cellular_component	RNA polymerase complex	GO:0030880	1	147	0.97	1	HORVU4Hr1G088690	1	http://amigo.geneontology.org/amigo/term/GO:0030880
cellular_component	supramolecular fiber	GO:0099512	1	191	0.75	1	HORVU4Hr1G087740	1	http://amigo.geneontology.org/amigo/term/GO:0099512
cellular_component	supramolecular polymer	GO:0099081	1	191	0.75	1	HORVU4Hr1G087740	1	http://amigo.geneontology.org/amigo/term/GO:0099081
cellular_component	transferase complex	GO:1990234	3	545	0.79	1	HORVU4Hr1G088660|HORVU5Hr1G094580|HORVU4Hr1G088690	1	http://amigo.geneontology.org/amigo/term/GO:1990234
cellular_component	transferase complex, transferring phosphorus-containing groups	GO:0061695	1	260	0.55	1	HORVU4Hr1G088690	1	http://amigo.geneontology.org/amigo/term/GO:0061695
cellular_component	ubiquitin ligase complex	GO:0000151	1	162	0.88	1	HORVU4Hr1G088660	1	http://amigo.geneontology.org/amigo/term/GO:0000151
cellular_component	vesicle	GO:0031982	2	350	0.82	1	HORVU5Hr1G094410|HORVU4Hr1G088390	1	http://amigo.geneontology.org/amigo/term/GO:0031982
cellular_component	vesicle membrane	GO:0012506	1	148	0.97	1	HORVU4Hr1G088390	1	http://amigo.geneontology.org/amigo/term/GO:0012506
molecular_function	formyltetrahydrofolate deformylase activity	GO:0008864	1	1	> 100	0.0138	HORVU4Hr1G088440	1	http://amigo.geneontology.org/amigo/term/GO:0008864
molecular_function	glucosaminyl-phosphatidylinositol O-acyltransferase activity	GO:0032216	1	1	> 100	0.0138	HORVU2Hr1G091290	1	http://amigo.geneontology.org/amigo/term/GO:0032216
molecular_function	NADPH:quinone reductase activity	GO:0003960	1	1	> 100	0.0138	HORVU4Hr1G088610	1	http://amigo.geneontology.org/amigo/term/GO:0003960
molecular_function	tripeptidyl-peptidase activity	GO:0008240	2	3	95.41	0.000473	HORVU6Hr1G063860|HORVU6Hr1G063910	0.278	http://amigo.geneontology.org/amigo/term/GO:0008240
molecular_function	phosphatidylserine decarboxylase activity	GO:0004609	1	2	71.55	0.0207	HORVU4Hr1G088470	1	http://amigo.geneontology.org/amigo/term/GO:0004609
molecular_function	trans-cinnamate 4-monooxygenase activity	GO:0016710	1	3	47.7	0.0275	HORVU4Hr1G087630	1	http://amigo.geneontology.org/amigo/term/GO:0016710
molecular_function	sigma factor activity	GO:0016987	1	4	35.78	0.0342	HORVU5Hr1G125110	1	http://amigo.geneontology.org/amigo/term/GO:0016987
molecular_function	L-leucine:2-oxoglutarate aminotransferase activity	GO:0050048	1	4	35.78	0.0342	HORVU4Hr1G087100	1	http://amigo.geneontology.org/amigo/term/GO:0050048
molecular_function	tRNA dihydrouridine synthase activity	GO:0017150	1	4	35.78	0.0342	HORVU2Hr1G091370	1	http://amigo.geneontology.org/amigo/term/GO:0017150
molecular_function	L-isoleucine transaminase activity	GO:0052656	1	4	35.78	0.0342	HORVU4Hr1G087100	1	http://amigo.geneontology.org/amigo/term/GO:0052656
molecular_function	L-valine transaminase activity	GO:0052655	1	4	35.78	0.0342	HORVU4Hr1G087100	1	http://amigo.geneontology.org/amigo/term/GO:0052655
molecular_function	L-leucine transaminase activity	GO:0052654	1	4	35.78	0.0342	HORVU4Hr1G087100	1	http://amigo.geneontology.org/amigo/term/GO:0052654
molecular_function	glutathione peroxidase activity	GO:0004602	1	4	35.78	0.0342	HORVU6Hr1G063830	1	http://amigo.geneontology.org/amigo/term/GO:0004602
molecular_function	histone methyltransferase activity (H3-K36 specific)	GO:0046975	1	5	28.62	0.0409	HORVU7Hr1G103420	1	http://amigo.geneontology.org/amigo/term/GO:0046975
molecular_function	branched-chain-amino-acid transaminase activity	GO:0004084	1	5	28.62	0.0409	HORVU4Hr1G087100	1	http://amigo.geneontology.org/amigo/term/GO:0004084
molecular_function	tRNA (guanine-N7-)-methyltransferase activity	GO:0008176	1	5	28.62	0.0409	HORVU5Hr1G094580	1	http://amigo.geneontology.org/amigo/term/GO:0008176
molecular_function	S-adenosyl-L-methionine transmembrane transporter activity	GO:0000095	1	6	23.85	0.0476	HORVU6Hr1G064010	1	http://amigo.geneontology.org/amigo/term/GO:0000095
molecular_function	rRNA N-glycosylase activity	GO:0030598	4	26	22.02	5.38e-05	HORVU4Hr1G087400|HORVU4Hr1G087430|HORVU4Hr1G087340|HORVU7Hr1G101470	0.127	http://amigo.geneontology.org/amigo/term/GO:0030598
molecular_function	RNA glycosylase activity	GO:0030597	4	26	22.02	5.38e-05	HORVU4Hr1G087400|HORVU4Hr1G087430|HORVU4Hr1G087340|HORVU7Hr1G101470	0.0633	http://amigo.geneontology.org/amigo/term/GO:0030597
molecular_function	nucleoside-diphosphatase activity	GO:0017110	2	14	20.44	0.0054	HORVU4Hr1G087230|HORVU2Hr1G003110	1	http://amigo.geneontology.org/amigo/term/GO:0017110
molecular_function	pectate lyase activity	GO:0030570	2	15	19.08	0.00609	HORVU2Hr1G002930|HORVU2Hr1G002880	1	http://amigo.geneontology.org/amigo/term/GO:0030570
molecular_function	xylanase activity	GO:0097599	1	8	17.89	0.0608	HORVU2Hr1G091270	1	http://amigo.geneontology.org/amigo/term/GO:0097599
molecular_function	organic cation transmembrane transporter activity	GO:0015101	1	8	17.89	0.0608	HORVU6Hr1G064010	1	http://amigo.geneontology.org/amigo/term/GO:0015101
molecular_function	xylan 1,4-beta-xylosidase activity	GO:0009044	1	8	17.89	0.0608	HORVU2Hr1G091270	1	http://amigo.geneontology.org/amigo/term/GO:0009044
molecular_function	carbon-oxygen lyase activity, acting on polysaccharides	GO:0016837	2	18	15.9	0.00839	HORVU2Hr1G002930|HORVU2Hr1G002880	1	http://amigo.geneontology.org/amigo/term/GO:0016837
molecular_function	beta-amylase activity	GO:0016161	1	9	15.9	0.0673	HORVU6Hr1G015670	1	http://amigo.geneontology.org/amigo/term/GO:0016161
molecular_function	amylopectin maltohydrolase activity	GO:0102229	1	9	15.9	0.0673	HORVU6Hr1G015670	1	http://amigo.geneontology.org/amigo/term/GO:0102229
molecular_function	nuclear export signal receptor activity	GO:0005049	1	9	15.9	0.0673	HORVU5Hr1G124770	1	http://amigo.geneontology.org/amigo/term/GO:0005049
molecular_function	N6-(Delta2-isopentenyl)-adenosine 5'-monophosphate phosphoribohydrolase activity	GO:0102682	1	9	15.9	0.0673	HORVU5Hr1G124750	1	http://amigo.geneontology.org/amigo/term/GO:0102682
molecular_function	sterol transporter activity	GO:0015248	1	9	15.9	0.0673	HORVU4Hr1G088060	1	http://amigo.geneontology.org/amigo/term/GO:0015248
molecular_function	alcohol-forming fatty acyl-CoA reductase activity	GO:0102965	2	22	13.01	0.012	HORVU5Hr1G124820|HORVU4Hr1G087110	1	http://amigo.geneontology.org/amigo/term/GO:0102965
molecular_function	chloride channel activity	GO:0005254	1	11	13.01	0.0802	HORVU4Hr1G087350	1	http://amigo.geneontology.org/amigo/term/GO:0005254
molecular_function	hydroxymethyl-, formyl- and related transferase activity	GO:0016742	1	11	13.01	0.0802	HORVU4Hr1G088440	1	http://amigo.geneontology.org/amigo/term/GO:0016742
molecular_function	fatty-acyl-CoA reductase (alcohol-forming) activity	GO:0080019	2	23	12.44	0.013	HORVU5Hr1G124820|HORVU4Hr1G087110	1	http://amigo.geneontology.org/amigo/term/GO:0080019
molecular_function	carbonate dehydratase activity	GO:0004089	1	12	11.93	0.0866	HORVU7Hr1G103870	1	http://amigo.geneontology.org/amigo/term/GO:0004089
molecular_function	sterol binding	GO:0032934	1	12	11.93	0.0866	HORVU4Hr1G088060	1	http://amigo.geneontology.org/amigo/term/GO:0032934
molecular_function	steroid binding	GO:0005496	1	12	11.93	0.0866	HORVU4Hr1G088060	1	http://amigo.geneontology.org/amigo/term/GO:0005496
molecular_function	catalytic activity, acting on a rRNA	GO:0140102	4	51	11.22	0.000585	HORVU4Hr1G087400|HORVU4Hr1G087430|HORVU4Hr1G087340|HORVU7Hr1G101470	0.275	http://amigo.geneontology.org/amigo/term/GO:0140102
molecular_function	cadmium ion transmembrane transporter activity	GO:0015086	1	13	11.01	0.0929	HORVU5Hr1G094430	1	http://amigo.geneontology.org/amigo/term/GO:0015086
molecular_function	toxin activity	GO:0090729	4	52	11.01	0.000626	HORVU4Hr1G087400|HORVU4Hr1G087430|HORVU4Hr1G087340|HORVU7Hr1G101470	0.246	http://amigo.geneontology.org/amigo/term/GO:0090729
molecular_function	hydrolase activity, hydrolyzing N-glycosyl compounds	GO:0016799	5	66	10.84	0.000139	HORVU5Hr1G124750|HORVU4Hr1G087400|HORVU4Hr1G087430|HORVU4Hr1G087340|HORVU7Hr1G101470	0.109	http://amigo.geneontology.org/amigo/term/GO:0016799
molecular_function	fatty acid derivative binding	GO:1901567	1	14	10.22	0.0992	HORVU6Hr1G016280	1	http://amigo.geneontology.org/amigo/term/GO:1901567
molecular_function	acyl-CoA binding	GO:0120227	1	14	10.22	0.0992	HORVU6Hr1G016280	1	http://amigo.geneontology.org/amigo/term/GO:0120227
molecular_function	fatty-acyl-CoA binding	GO:0000062	1	14	10.22	0.0992	HORVU6Hr1G016280	1	http://amigo.geneontology.org/amigo/term/GO:0000062
molecular_function	protein tag	GO:0031386	3	47	9.13	0.00509	HORVU7Hr1G103330|HORVU6Hr1G016200|HORVU6Hr1G016200	1	http://amigo.geneontology.org/amigo/term/GO:0031386
molecular_function	oxidoreductase activity, acting on a sulfur group of donors, disulfide as acceptor	GO:0016671	1	16	8.94	0.112	HORVU2Hr1G091200	1	http://amigo.geneontology.org/amigo/term/GO:0016671
molecular_function	structural constituent of cytoskeleton	GO:0005200	1	18	7.95	0.124	HORVU4Hr1G087740	1	http://amigo.geneontology.org/amigo/term/GO:0005200
molecular_function	alpha-L-arabinofuranosidase activity	GO:0046556	1	18	7.95	0.124	HORVU2Hr1G091270	1	http://amigo.geneontology.org/amigo/term/GO:0046556
molecular_function	nitrate transmembrane transporter activity	GO:0015112	1	19	7.53	0.13	HORVU4Hr1G088020	1	http://amigo.geneontology.org/amigo/term/GO:0015112
molecular_function	amylase activity	GO:0016160	1	19	7.53	0.13	HORVU6Hr1G015670	1	http://amigo.geneontology.org/amigo/term/GO:0016160
molecular_function	tRNA (guanine) methyltransferase activity	GO:0016423	1	20	7.16	0.136	HORVU5Hr1G094580	1	http://amigo.geneontology.org/amigo/term/GO:0016423
molecular_function	GTPase activator activity	GO:0005096	3	61	7.04	0.0101	HORVU7Hr1G101390|HORVU7Hr1G103510|HORVU5Hr1G124670	1	http://amigo.geneontology.org/amigo/term/GO:0005096
molecular_function	zinc ion transmembrane transporter activity	GO:0005385	1	23	6.22	0.154	HORVU5Hr1G094430	1	http://amigo.geneontology.org/amigo/term/GO:0005385
molecular_function	small GTPase binding	GO:0031267	1	23	6.22	0.154	HORVU5Hr1G124770	1	http://amigo.geneontology.org/amigo/term/GO:0031267
molecular_function	ubiquitin protein ligase binding	GO:0031625	3	71	6.05	0.0149	HORVU7Hr1G103330|HORVU6Hr1G016200|HORVU7Hr1G103380	1	http://amigo.geneontology.org/amigo/term/GO:0031625
molecular_function	water transmembrane transporter activity	GO:0005372	1	24	5.96	0.16	HORVU6Hr1G064140	1	http://amigo.geneontology.org/amigo/term/GO:0005372
molecular_function	GTPase binding	GO:0051020	1	24	5.96	0.16	HORVU5Hr1G124770	1	http://amigo.geneontology.org/amigo/term/GO:0051020
molecular_function	nucleocytoplasmic carrier activity	GO:0140142	1	24	5.96	0.16	HORVU5Hr1G124770	1	http://amigo.geneontology.org/amigo/term/GO:0140142
molecular_function	water channel activity	GO:0015250	1	24	5.96	0.16	HORVU6Hr1G064140	1	http://amigo.geneontology.org/amigo/term/GO:0015250
molecular_function	ubiquitin-like protein ligase binding	GO:0044389	3	73	5.88	0.016	HORVU7Hr1G103330|HORVU6Hr1G016200|HORVU7Hr1G103380	1	http://amigo.geneontology.org/amigo/term/GO:0044389
molecular_function	transmembrane receptor protein serine/threonine kinase activity	GO:0004675	3	81	5.3	0.0208	HORVU2Hr1G002840|HORVU2Hr1G002750|HORVU2Hr1G091360	1	http://amigo.geneontology.org/amigo/term/GO:0004675
molecular_function	transmembrane receptor protein kinase activity	GO:0019199	3	84	5.11	0.0228	HORVU2Hr1G002840|HORVU2Hr1G002750|HORVU2Hr1G091360	1	http://amigo.geneontology.org/amigo/term/GO:0019199
molecular_function	lipid transporter activity	GO:0005319	2	58	4.93	0.0653	HORVU4Hr1G087670|HORVU4Hr1G088060	1	http://amigo.geneontology.org/amigo/term/GO:0005319
molecular_function	tRNA methyltransferase activity	GO:0008175	1	29	4.93	0.189	HORVU5Hr1G094580	1	http://amigo.geneontology.org/amigo/term/GO:0008175
molecular_function	nucleobase transmembrane transporter activity	GO:0015205	1	31	4.62	0.2	HORVU6Hr1G064220	1	http://amigo.geneontology.org/amigo/term/GO:0015205
molecular_function	histone-lysine N-methyltransferase activity	GO:0018024	1	31	4.62	0.2	HORVU7Hr1G103420	1	http://amigo.geneontology.org/amigo/term/GO:0018024
molecular_function	transmembrane signaling receptor activity	GO:0004888	3	94	4.57	0.0302	HORVU2Hr1G002840|HORVU2Hr1G002750|HORVU2Hr1G091360	1	http://amigo.geneontology.org/amigo/term/GO:0004888
molecular_function	sulfur compound transmembrane transporter activity	GO:1901682	1	32	4.47	0.205	HORVU6Hr1G064010	1	http://amigo.geneontology.org/amigo/term/GO:1901682
molecular_function	N,N-dimethylaniline monooxygenase activity	GO:0004499	1	33	4.34	0.211	HORVU4Hr1G087900	1	http://amigo.geneontology.org/amigo/term/GO:0004499
molecular_function	cellulase activity	GO:0008810	1	33	4.34	0.211	HORVU4Hr1G087990	1	http://amigo.geneontology.org/amigo/term/GO:0008810
molecular_function	oxidoreductase activity, acting on the aldehyde or oxo group of donors, NAD or NADP as acceptor	GO:0016620	2	67	4.27	0.0832	HORVU5Hr1G124820|HORVU4Hr1G087110	1	http://amigo.geneontology.org/amigo/term/GO:0016620
molecular_function	glucuronosyltransferase activity	GO:0015020	1	34	4.21	0.216	HORVU4Hr1G088520	1	http://amigo.geneontology.org/amigo/term/GO:0015020
molecular_function	histone methyltransferase activity	GO:0042054	1	35	4.09	0.222	HORVU7Hr1G103420	1	http://amigo.geneontology.org/amigo/term/GO:0042054
molecular_function	minor groove of adenine-thymine-rich DNA binding	GO:0003680	1	36	3.98	0.227	HORVU4Hr1G087750	1	http://amigo.geneontology.org/amigo/term/GO:0003680
molecular_function	serine-type exopeptidase activity	GO:0070008	2	72	3.98	0.0936	HORVU6Hr1G063860|HORVU6Hr1G063910	1	http://amigo.geneontology.org/amigo/term/GO:0070008
molecular_function	DNA helicase activity	GO:0003678	2	73	3.92	0.0958	HORVU7Hr1G103800|HORVU7Hr1G101690	1	http://amigo.geneontology.org/amigo/term/GO:0003678
molecular_function	nucleoside-triphosphatase regulator activity	GO:0060589	3	111	3.87	0.0453	HORVU7Hr1G101390|HORVU7Hr1G103510|HORVU5Hr1G124670	1	http://amigo.geneontology.org/amigo/term/GO:0060589
molecular_function	anion channel activity	GO:0005253	1	37	3.87	0.233	HORVU4Hr1G087350	1	http://amigo.geneontology.org/amigo/term/GO:0005253
molecular_function	GTPase regulator activity	GO:0030695	3	111	3.87	0.0453	HORVU7Hr1G101390|HORVU7Hr1G103510|HORVU5Hr1G124670	1	http://amigo.geneontology.org/amigo/term/GO:0030695
molecular_function	enzyme activator activity	GO:0008047	3	113	3.8	0.0473	HORVU7Hr1G101390|HORVU7Hr1G103510|HORVU5Hr1G124670	1	http://amigo.geneontology.org/amigo/term/GO:0008047
molecular_function	ATP-dependent activity, acting on DNA	GO:0008094	3	118	3.64	0.0524	HORVU4Hr1G088540|HORVU7Hr1G103800|HORVU7Hr1G101690	1	http://amigo.geneontology.org/amigo/term/GO:0008094
molecular_function	N-acyltransferase activity	GO:0016410	2	79	3.62	0.109	HORVU4Hr1G087510|HORVU4Hr1G087250	1	http://amigo.geneontology.org/amigo/term/GO:0016410
molecular_function	thiolester hydrolase activity	GO:0016790	1	40	3.58	0.248	HORVU4Hr1G088720	1	http://amigo.geneontology.org/amigo/term/GO:0016790
molecular_function	ubiquitin-like protein conjugating enzyme binding	GO:0044390	1	40	3.58	0.248	HORVU2Hr1G091220	1	http://amigo.geneontology.org/amigo/term/GO:0044390
molecular_function	oxidoreductase activity, acting on the aldehyde or oxo group of donors	GO:0016903	2	82	3.49	0.116	HORVU5Hr1G124820|HORVU4Hr1G087110	1	http://amigo.geneontology.org/amigo/term/GO:0016903
molecular_function	oxidoreductase activity, acting on NAD(P)H, quinone or similar compound as acceptor	GO:0016655	3	124	3.46	0.0589	HORVU4Hr1G088610|HORVU7Hr1G101500|HORVU6Hr1G064590	1	http://amigo.geneontology.org/amigo/term/GO:0016655
molecular_function	DNA secondary structure binding	GO:0000217	1	42	3.41	0.259	HORVU4Hr1G087750	1	http://amigo.geneontology.org/amigo/term/GO:0000217
molecular_function	signaling receptor activity	GO:0038023	4	182	3.15	0.0412	HORVU2Hr1G002840|HORVU2Hr1G002630|HORVU2Hr1G002750|HORVU2Hr1G091360	1	http://amigo.geneontology.org/amigo/term/GO:0038023
molecular_function	ubiquitin protein ligase activity	GO:0061630	5	228	3.14	0.0237	HORVU4Hr1G088660|HORVU6Hr1G016120|HORVU2Hr1G091220|HORVU4Hr1G087120|HORVU6Hr1G064450	1	http://amigo.geneontology.org/amigo/term/GO:0061630
molecular_function	ubiquitin-like protein ligase activity	GO:0061659	5	236	3.03	0.0269	HORVU4Hr1G088660|HORVU6Hr1G016120|HORVU2Hr1G091220|HORVU4Hr1G087120|HORVU6Hr1G064450	1	http://amigo.geneontology.org/amigo/term/GO:0061659
molecular_function	chaperone binding	GO:0051087	1	48	2.98	0.289	HORVU6Hr1G016080	1	http://amigo.geneontology.org/amigo/term/GO:0051087
molecular_function	inorganic anion transmembrane transporter activity	GO:0015103	2	98	2.92	0.153	HORVU4Hr1G088020|HORVU4Hr1G087350	1	http://amigo.geneontology.org/amigo/term/GO:0015103
molecular_function	protein-lysine N-methyltransferase activity	GO:0016279	1	50	2.86	0.299	HORVU7Hr1G103420	1	http://amigo.geneontology.org/amigo/term/GO:0016279
molecular_function	lysine N-methyltransferase activity	GO:0016278	1	50	2.86	0.299	HORVU7Hr1G103420	1	http://amigo.geneontology.org/amigo/term/GO:0016278
molecular_function	enzyme binding	GO:0019899	5	257	2.78	0.0366	HORVU7Hr1G103330|HORVU5Hr1G124770|HORVU6Hr1G016200|HORVU2Hr1G091220|HORVU7Hr1G103380	1	http://amigo.geneontology.org/amigo/term/GO:0019899
molecular_function	molecular transducer activity	GO:0060089	4	209	2.74	0.0617	HORVU2Hr1G002840|HORVU2Hr1G002630|HORVU2Hr1G002750|HORVU2Hr1G091360	1	http://amigo.geneontology.org/amigo/term/GO:0060089
molecular_function	ubiquitin-protein transferase activity	GO:0004842	8	432	2.65	0.0122	HORVU4Hr1G088660|HORVU4Hr1G088650|HORVU6Hr1G016120|HORVU2Hr1G091220|HORVU6Hr1G064110|HORVU4Hr1G087120|HORVU6Hr1G064450|HORVU6Hr1G064130	1	http://amigo.geneontology.org/amigo/term/GO:0004842
molecular_function	ubiquitin-like protein transferase activity	GO:0019787	8	450	2.54	0.0152	HORVU4Hr1G088660|HORVU4Hr1G088650|HORVU6Hr1G016120|HORVU2Hr1G091220|HORVU6Hr1G064110|HORVU4Hr1G087120|HORVU6Hr1G064450|HORVU6Hr1G064130	1	http://amigo.geneontology.org/amigo/term/GO:0019787
molecular_function	carbon-oxygen lyase activity	GO:0016835	3	169	2.54	0.118	HORVU7Hr1G103870|HORVU2Hr1G002930|HORVU2Hr1G002880	1	http://amigo.geneontology.org/amigo/term/GO:0016835
molecular_function	helicase activity	GO:0004386	3	169	2.54	0.118	HORVU7Hr1G103800|HORVU4Hr1G088270|HORVU7Hr1G101690	1	http://amigo.geneontology.org/amigo/term/GO:0004386
molecular_function	transferase activity, transferring nitrogenous groups	GO:0016769	1	57	2.51	0.332	HORVU4Hr1G087100	1	http://amigo.geneontology.org/amigo/term/GO:0016769
molecular_function	transaminase activity	GO:0008483	1	57	2.51	0.332	HORVU4Hr1G087100	1	http://amigo.geneontology.org/amigo/term/GO:0008483
molecular_function	NADH dehydrogenase (quinone) activity	GO:0050136	2	116	2.47	0.198	HORVU7Hr1G101500|HORVU6Hr1G064590	1	http://amigo.geneontology.org/amigo/term/GO:0050136
molecular_function	NAD(P)H dehydrogenase (quinone) activity	GO:0003955	2	117	2.45	0.2	HORVU7Hr1G101500|HORVU6Hr1G064590	1	http://amigo.geneontology.org/amigo/term/GO:0003955
molecular_function	ATPase-coupled cation transmembrane transporter activity	GO:0019829	1	59	2.43	0.342	HORVU5Hr1G094430	1	http://amigo.geneontology.org/amigo/term/GO:0019829
molecular_function	exopeptidase activity	GO:0008238	2	120	2.39	0.208	HORVU6Hr1G063860|HORVU6Hr1G063910	1	http://amigo.geneontology.org/amigo/term/GO:0008238
molecular_function	oxidoreductase activity, acting on NAD(P)H	GO:0016651	3	181	2.37	0.137	HORVU4Hr1G088610|HORVU7Hr1G101500|HORVU6Hr1G064590	1	http://amigo.geneontology.org/amigo/term/GO:0016651
molecular_function	hydrolase activity, acting on carbon-nitrogen (but not peptide) bonds, in linear amides	GO:0016811	1	61	2.35	0.351	HORVU4Hr1G088440	1	http://amigo.geneontology.org/amigo/term/GO:0016811
molecular_function	xenobiotic transmembrane transporter activity	GO:0042910	1	61	2.35	0.351	HORVU5Hr1G124880	1	http://amigo.geneontology.org/amigo/term/GO:0042910
molecular_function	molecular carrier activity	GO:0140104	1	62	2.31	0.355	HORVU5Hr1G124770	1	http://amigo.geneontology.org/amigo/term/GO:0140104
molecular_function	sulfur compound binding	GO:1901681	1	64	2.24	0.364	HORVU6Hr1G016280	1	http://amigo.geneontology.org/amigo/term/GO:1901681
molecular_function	transition metal ion transmembrane transporter activity	GO:0046915	1	65	2.2	0.369	HORVU5Hr1G094430	1	http://amigo.geneontology.org/amigo/term/GO:0046915
molecular_function	protein-disulfide reductase activity	GO:0015035	1	65	2.2	0.369	HORVU2Hr1G091200	1	http://amigo.geneontology.org/amigo/term/GO:0015035
molecular_function	histone binding	GO:0042393	1	66	2.17	0.373	HORVU6Hr1G063900	1	http://amigo.geneontology.org/amigo/term/GO:0042393
molecular_function	RNA methyltransferase activity	GO:0008173	1	67	2.14	0.377	HORVU5Hr1G094580	1	http://amigo.geneontology.org/amigo/term/GO:0008173
molecular_function	disulfide oxidoreductase activity	GO:0015036	1	68	2.1	0.382	HORVU2Hr1G091200	1	http://amigo.geneontology.org/amigo/term/GO:0015036
molecular_function	hydrolase activity, acting on glycosyl bonds	GO:0016798	8	548	2.09	0.0615	HORVU5Hr1G124750|HORVU2Hr1G091270|HORVU4Hr1G087990|HORVU4Hr1G087400|HORVU6Hr1G015670|HORVU4Hr1G087430|HORVU4Hr1G087340|HORVU7Hr1G101470	1	http://amigo.geneontology.org/amigo/term/GO:0016798
molecular_function	NADH dehydrogenase activity	GO:0003954	2	137	2.09	0.251	HORVU7Hr1G101500|HORVU6Hr1G064590	1	http://amigo.geneontology.org/amigo/term/GO:0003954
molecular_function	monooxygenase activity	GO:0004497	7	482	2.08	0.0879	HORVU7Hr1G101590|HORVU4Hr1G087560|HORVU4Hr1G087630|HORVU7Hr1G101610|HORVU6Hr1G064170|HORVU4Hr1G087900|HORVU2Hr1G002650	1	http://amigo.geneontology.org/amigo/term/GO:0004497
molecular_function	ubiquitin binding	GO:0043130	1	70	2.04	0.39	HORVU2Hr1G002700	1	http://amigo.geneontology.org/amigo/term/GO:0043130
molecular_function	oxidoreductase activity, acting on paired donors, with incorporation or reduction of molecular oxygen, NAD(P)H as one donor, and incorporation of one atom of oxygen	GO:0016709	2	141	2.03	0.261	HORVU4Hr1G087630|HORVU4Hr1G087900	1	http://amigo.geneontology.org/amigo/term/GO:0016709
molecular_function	protein methyltransferase activity	GO:0008276	1	71	2.02	0.395	HORVU7Hr1G103420	1	http://amigo.geneontology.org/amigo/term/GO:0008276
molecular_function	ubiquitin-like protein binding	GO:0032182	1	73	1.96	0.403	HORVU2Hr1G002700	1	http://amigo.geneontology.org/amigo/term/GO:0032182
molecular_function	flavin adenine dinucleotide binding	GO:0050660	3	219	1.96	0.201	HORVU4Hr1G087680|HORVU2Hr1G091370|HORVU4Hr1G087900	1	http://amigo.geneontology.org/amigo/term/GO:0050660
molecular_function	oxidoreductase activity, acting on paired donors, with incorporation or reduction of molecular oxygen	GO:0016705	7	516	1.94	0.0991	HORVU7Hr1G101590|HORVU4Hr1G087560|HORVU4Hr1G087630|HORVU7Hr1G101610|HORVU6Hr1G064170|HORVU4Hr1G087900|HORVU2Hr1G002650	1	http://amigo.geneontology.org/amigo/term/GO:0016705
molecular_function	catalytic activity, acting on RNA	GO:0140098	7	529	1.89	0.105	HORVU5Hr1G094580|HORVU2Hr1G091370|HORVU4Hr1G087400|HORVU4Hr1G087430|HORVU4Hr1G088270|HORVU4Hr1G087340|HORVU7Hr1G101470	1	http://amigo.geneontology.org/amigo/term/GO:0140098
molecular_function	RNA helicase activity	GO:0003724	1	76	1.88	0.415	HORVU4Hr1G088270	1	http://amigo.geneontology.org/amigo/term/GO:0003724
molecular_function	transcription coregulator activity	GO:0003712	2	152	1.88	0.29	HORVU5Hr1G125050|HORVU4Hr1G087360	1	http://amigo.geneontology.org/amigo/term/GO:0003712
molecular_function	ATP-dependent activity, acting on RNA	GO:0008186	1	76	1.88	0.415	HORVU4Hr1G088270	1	http://amigo.geneontology.org/amigo/term/GO:0008186
molecular_function	serine-type endopeptidase activity	GO:0004252	2	154	1.86	0.295	HORVU6Hr1G063860|HORVU6Hr1G064070	1	http://amigo.geneontology.org/amigo/term/GO:0004252
molecular_function	catalytic activity, acting on a nucleic acid	GO:0140640	10	773	1.85	0.0744	HORVU4Hr1G088540|HORVU5Hr1G094580|HORVU2Hr1G091370|HORVU4Hr1G087400|HORVU7Hr1G103800|HORVU4Hr1G087430|HORVU4Hr1G088270|HORVU4Hr1G087340|HORVU7Hr1G101470|HORVU7Hr1G101690	1	http://amigo.geneontology.org/amigo/term/GO:0140640
molecular_function	NADP binding	GO:0050661	1	78	1.83	0.423	HORVU4Hr1G087900	1	http://amigo.geneontology.org/amigo/term/GO:0050661
molecular_function	catalytic activity, acting on a tRNA	GO:0140101	2	158	1.81	0.305	HORVU5Hr1G094580|HORVU2Hr1G091370	1	http://amigo.geneontology.org/amigo/term/GO:0140101
molecular_function	catalytic activity, acting on DNA	GO:0140097	3	238	1.8	0.235	HORVU4Hr1G088540|HORVU7Hr1G103800|HORVU7Hr1G101690	1	http://amigo.geneontology.org/amigo/term/GO:0140097
molecular_function	iron ion binding	GO:0005506	6	482	1.78	0.158	HORVU7Hr1G101590|HORVU4Hr1G087560HORVU4Hr1G087630HORVU7Hr1G101610HORVU6Hr1G064170HORVU2Hr1G002650	1	http://amigo.geneontology.org/amigo/term/GO:0005506
molecular_function	serine hydrolase activity	GO:0017171	3	244	1.76	0.246	HORVU6Hr1G063860|HORVU6Hr1G063910|HORVU6Hr1G064070	1	http://amigo.geneontology.org/amigo/term/GO:0017171
molecular_function	serine-type peptidase activity	GO:0008236	3	244	1.76	0.246	HORVU6Hr1G063860|HORVU6Hr1G063910|HORVU6Hr1G064070	1	http://amigo.geneontology.org/amigo/term/GO:0008236
molecular_function	acyltransferase activity, transferring groups other than amino-acyl groups	GO:0016747	6	503	1.71	0.173	HORVU2Hr1G091290|HORVU2Hr1G002640|HORVU5Hr1G094460|HORVU4Hr1G087510|HORVU4Hr1G087910|HORVU4Hr1G087250	1	http://amigo.geneontology.org/amigo/term/GO:0016747
molecular_function	anion transmembrane transporter activity	GO:0008509	2	168	1.7	0.33	HORVU4Hr1G088020|HORVU4Hr1G087350	1	http://amigo.geneontology.org/amigo/term/GO:0008509
molecular_function	protein serine kinase activity	GO:0106310	2	169	1.69	0.333	HORVU2Hr1G002830|HORVU5Hr1G124800	1	http://amigo.geneontology.org/amigo/term/GO:0106310
molecular_function	carbohydrate binding	GO:0030246	4	340	1.68	0.308	HORVU2Hr1G002840|HORVU2Hr1G002750|HORVU4Hr1G087990|HORVU2Hr1G091360	1	http://amigo.geneontology.org/amigo/term/GO:0030246
molecular_function	acyltransferase activity	GO:0016746	6	528	1.63	0.192	HORVU2Hr1G091290|HORVU2Hr1G002640|HORVU5Hr1G094460|HORVU4Hr1G087510|HORVU4Hr1G087910|HORVU4Hr1G087250	1	http://amigo.geneontology.org/amigo/term/GO:0016746
molecular_function	oxidoreductase activity, acting on the CH-CH group of donors	GO:0016627	1	88	1.63	0.462	HORVU2Hr1G091370	1	http://amigo.geneontology.org/amigo/term/GO:0016627
molecular_function	protein serine/threonine/tyrosine kinase activity	GO:0004712	2	177	1.62	0.353	HORVU2Hr1G002830|HORVU5Hr1G124800	1	http://amigo.geneontology.org/amigo/term/GO:0004712
molecular_function	protein serine/threonine kinase activity	GO:0004674	10	885	1.62	0.146	HORVU2Hr1G002830|HORVU2Hr1G002840|HORVU4Hr1G087060|HORVU2Hr1G002750|HORVU5Hr1G124810|HORVU2Hr1G091360|HORVU4Hr1G087720|HORVU5Hr1G124800|HORVU5Hr1G094510|HORVU2Hr1G091090	1	http://amigo.geneontology.org/amigo/term/GO:0004674
molecular_function	adenyl ribonucleotide binding	GO:0032559	32	2837	1.61	0.00926	HORVU2Hr1G002660|HORVU2Hr1G002690|HORVU2Hr1G002750|HORVU2Hr1G002830|HORVU2Hr1G002840|HORVU2Hr1G003040|HORVU2Hr1G003070|HORVU2Hr1G003110|HORVU2Hr1G091090|HORVU2Hr1G091360|HORVU2Hr1G091410|HORVU4Hr1G087060|HORVU4Hr1G087230|HORVU4Hr1G087670|HORVU4Hr1G087720|HORVU4Hr1G088090|HORVU4Hr1G088270|HORVU4Hr1G088540|HORVU4Hr1G088650|HORVU5Hr1G094430|HORVU5Hr1G094510|HORVU5Hr1G124800|HORVU5Hr1G124810|HORVU5Hr…	1	http://amigo.geneontology.org/amigo/term/GO:0032559
molecular_function	adenyl nucleotide binding	GO:0030554	32	2852	1.61	0.00942	HORVU2Hr1G002660|HORVU2Hr1G002690|HORVU2Hr1G002750|HORVU2Hr1G002830|HORVU2Hr1G002840|HORVU2Hr1G003040|HORVU2Hr1G003070|HORVU2Hr1G003110|HORVU2Hr1G091090|HORVU2Hr1G091360|HORVU2Hr1G091410|HORVU4Hr1G087060|HORVU4Hr1G087230|HORVU4Hr1G087670|HORVU4Hr1G087720|HORVU4Hr1G088090|HORVU4Hr1G088270|HORVU4Hr1G088540|HORVU4Hr1G088650|HORVU5Hr1G094430|HORVU5Hr1G094510|HORVU5Hr1G124800|HORVU5Hr1G124810|HORVU5Hr…	1	http://amigo.geneontology.org/amigo/term/GO:0030554
molecular_function	ATP binding	GO:0005524	31	2788	1.59	0.0123	HORVU2Hr1G002660|HORVU2Hr1G002690|HORVU2Hr1G002750|HORVU2Hr1G002830|HORVU2Hr1G002840|HORVU2Hr1G003040|HORVU2Hr1G003070|HORVU2Hr1G003110|HORVU2Hr1G091090|HORVU2Hr1G091360|HORVU2Hr1G091410|HORVU4Hr1G087060|HORVU4Hr1G087230|HORVU4Hr1G087670|HORVU4Hr1G087720|HORVU4Hr1G088090|HORVU4Hr1G088270|HORVU4Hr1G088540|HORVU4Hr1G088650|HORVU5Hr1G094430|HORVU5Hr1G094510|HORVU5Hr1G124800|HORVU5Hr1G124810|HORVU5Hr…	1	http://amigo.geneontology.org/amigo/term/GO:0005524
molecular_function	molecular adaptor activity	GO:0060090	1	90	1.59	0.47	HORVU4Hr1G088210	1	http://amigo.geneontology.org/amigo/term/GO:0060090
molecular_function	lipid binding	GO:0008289	3	271	1.58	0.444	HORVU7Hr1G101310|HORVU4Hr1G088060|HORVU6Hr1G016280	1	http://amigo.geneontology.org/amigo/term/GO:0008289
molecular_function	purine ribonucleotide binding	GO:0032555	34	3083	1.58	0.00887	HORVU2Hr1G002660|HORVU2Hr1G002690|HORVU2Hr1G002750|HORVU2Hr1G002830|HORVU2Hr1G002840|HORVU2Hr1G003040|HORVU2Hr1G003070|HORVU2Hr1G003110|HORVU2Hr1G091090|HORVU2Hr1G091360|HORVU2Hr1G091410|HORVU4Hr1G087060|HORVU4Hr1G087230|HORVU4Hr1G087670|HORVU4Hr1G087720|HORVU4Hr1G087740|HORVU4Hr1G088090|HORVU4Hr1G088270|HORVU4Hr1G088540|HORVU4Hr1G088650|HORVU5Hr1G094430|HORVU5Hr1G094510|HORVU5Hr1G124800|HORVU5Hr…	1	http://amigo.geneontology.org/amigo/term/GO:0032555
molecular_function	purine nucleotide binding	GO:0017076	34	3105	1.57	0.00922	HORVU2Hr1G002660|HORVU2Hr1G002690|HORVU2Hr1G002750|HORVU2Hr1G002830|HORVU2Hr1G002840|HORVU2Hr1G003040|HORVU2Hr1G003070|HORVU2Hr1G003110|HORVU2Hr1G091090|HORVU2Hr1G091360|HORVU2Hr1G091410|HORVU4Hr1G087060|HORVU4Hr1G087230|HORVU4Hr1G087670|HORVU4Hr1G087720|HORVU4Hr1G087740|HORVU4Hr1G088090|HORVU4Hr1G088270|HORVU4Hr1G088540|HORVU4Hr1G088650|HORVU5Hr1G094430|HORVU5Hr1G094510|HORVU5Hr1G124800|HORVU5Hr…	1	http://amigo.geneontology.org/amigo/term/GO:0017076
molecular_function	protein kinase activity	GO:0004672	17	1553	1.57	0.062	HORVU2Hr1G002830|HORVU2Hr1G002840|HORVU4Hr1G087060|HORVU4Hr1G088650|HORVU2Hr1G002750|HORVU5Hr1G124810|HORVU2Hr1G091360|HORVU2Hr1G002690|HORVU4Hr1G088090|HORVU2Hr1G002660|HORVU5Hr1G094510|HORVU2Hr1G091090|HORVU4Hr1G087720|HORVU6Hr1G064150|HORVU5Hr1G124800|HORVU6Hr1G064110|HORVU6Hr1G064130	1	http://amigo.geneontology.org/amigo/term/GO:0004672
molecular_function	ribonucleotide binding	GO:0032553	34	3125	1.56	0.00961	HORVU2Hr1G002660|HORVU2Hr1G002690|HORVU2Hr1G002750|HORVU2Hr1G002830|HORVU2Hr1G002840|HORVU2Hr1G003040|HORVU2Hr1G003070|HORVU2Hr1G003110|HORVU2Hr1G091090|HORVU2Hr1G091360|HORVU2Hr1G091410|HORVU4Hr1G087060|HORVU4Hr1G087230|HORVU4Hr1G087670|HORVU4Hr1G087720|HORVU4Hr1G087740|HORVU4Hr1G088090|HORVU4Hr1G088270|HORVU4Hr1G088540|HORVU4Hr1G088650|HORVU5Hr1G094430|HORVU5Hr1G094510|HORVU5Hr1G124800|HORVU5Hr…	1	http://amigo.geneontology.org/amigo/term/GO:0032553
molecular_function	purine ribonucleoside triphosphate binding	GO:0035639	33	3034	1.56	0.0118	HORVU2Hr1G002660|HORVU2Hr1G002690|HORVU2Hr1G002750|HORVU2Hr1G002830|HORVU2Hr1G002840|HORVU2Hr1G003040|HORVU2Hr1G003070|HORVU2Hr1G003110|HORVU2Hr1G091090|HORVU2Hr1G091360|HORVU2Hr1G091410|HORVU4Hr1G087060|HORVU4Hr1G087230|HORVU4Hr1G087670|HORVU4Hr1G087720|HORVU4Hr1G087740|HORVU4Hr1G088090|HORVU4Hr1G088270|HORVU4Hr1G088540|HORVU4Hr1G088650|HORVU5Hr1G094430|HORVU5Hr1G094510|HORVU5Hr1G124800|HORVU5Hr…	1	http://amigo.geneontology.org/amigo/term/GO:0035639
molecular_function	carbohydrate derivative binding	GO:0097367	34	3156	1.54	0.0133	HORVU2Hr1G002660|HORVU2Hr1G002690|HORVU2Hr1G002750|HORVU2Hr1G002830|HORVU2Hr1G002840|HORVU2Hr1G003040|HORVU2Hr1G003070|HORVU2Hr1G003110|HORVU2Hr1G091090|HORVU2Hr1G091360|HORVU2Hr1G091410|HORVU4Hr1G087060|HORVU4Hr1G087230|HORVU4Hr1G087670|HORVU4Hr1G087720|HORVU4Hr1G087740|HORVU4Hr1G088090|HORVU4Hr1G088270|HORVU4Hr1G088540|HORVU4Hr1G088650|HORVU5Hr1G094430|HORVU5Hr1G094510|HORVU5Hr1G124800|HORVU5Hr…	1	http://amigo.geneontology.org/amigo/term/GO:0097367
molecular_function	N-methyltransferase activity	GO:0008170	1	94	1.52	0.484	HORVU7Hr1G103420	1	http://amigo.geneontology.org/amigo/term/GO:0008170
molecular_function	nucleotide binding	GO:0000166	37	3528	1.5	0.0139	HORVU2Hr1G002660|HORVU2Hr1G002690|HORVU2Hr1G002750|HORVU2Hr1G002830|HORVU2Hr1G002840|HORVU2Hr1G003040|HORVU2Hr1G003070|HORVU2Hr1G003110|HORVU2Hr1G091090|HORVU2Hr1G091360|HORVU2Hr1G091370|HORVU2Hr1G091410|HORVU4Hr1G087060|HORVU4Hr1G087230|HORVU4Hr1G087670|HORVU4Hr1G087680|HORVU4Hr1G087720|HORVU4Hr1G087740|HORVU4Hr1G087900|HORVU4Hr1G088090|HORVU4Hr1G088270|HORVU4Hr1G088540|HORVU4Hr1G088650|HORVU5Hr…	1	http://amigo.geneontology.org/amigo/term/GO:0000166
molecular_function	nucleoside phosphate binding	GO:1901265	37	3528	1.5	0.0139	HORVU2Hr1G002660|HORVU2Hr1G002690|HORVU2Hr1G002750|HORVU2Hr1G002830|HORVU2Hr1G002840|HORVU2Hr1G003040|HORVU2Hr1G003070|HORVU2Hr1G003110|HORVU2Hr1G091090|HORVU2Hr1G091360|HORVU2Hr1G091370|HORVU2Hr1G091410|HORVU4Hr1G087060|HORVU4Hr1G087230|HORVU4Hr1G087670|HORVU4Hr1G087680|HORVU4Hr1G087720|HORVU4Hr1G087740|HORVU4Hr1G087900|HORVU4Hr1G088090|HORVU4Hr1G088270|HORVU4Hr1G088540|HORVU4Hr1G088650|HORVU5Hr…	1	http://amigo.geneontology.org/amigo/term/GO:1901265
molecular_function	ATPase-coupled transmembrane transporter activity	GO:0042626	2	192	1.49	0.39	HORVU4Hr1G087670|HORVU5Hr1G094430	1	http://amigo.geneontology.org/amigo/term/GO:0042626
molecular_function	NADH dehydrogenase (ubiquinone) activity	GO:0008137	1	98	1.46	0.499	HORVU6Hr1G064590	1	http://amigo.geneontology.org/amigo/term/GO:0008137
molecular_function	oxidoreductase activity, acting on a sulfur group of donors	GO:0016667	1	99	1.45	0.502	HORVU2Hr1G091200	1	http://amigo.geneontology.org/amigo/term/GO:0016667
molecular_function	anion binding	GO:0043168	36	3613	1.43	0.0344	HORVU2Hr1G002660|HORVU2Hr1G002690|HORVU2Hr1G002750|HORVU2Hr1G002830|HORVU2Hr1G002840|HORVU2Hr1G003040|HORVU2Hr1G003070|HORVU2Hr1G003110|HORVU2Hr1G091090|HORVU2Hr1G091360|HORVU2Hr1G091370|HORVU2Hr1G091410|HORVU4Hr1G087060|HORVU4Hr1G087230|HORVU4Hr1G087670|HORVU4Hr1G087680|HORVU4Hr1G087720|HORVU4Hr1G087740|HORVU4Hr1G087900|HORVU4Hr1G088090|HORVU4Hr1G088270|HORVU4Hr1G088540|HORVU4Hr1G088650|HORVU5Hr…	1	http://amigo.geneontology.org/amigo/term/GO:0043168
molecular_function	pyrophosphatase activity	GO:0016462	7	703	1.42	0.353	HORVU6Hr1G063810|HORVU4Hr1G087740|HORVU6Hr1G016100|HORVU7Hr1G103800|HORVU4Hr1G087230|HORVU2Hr1G003110|HORVU7Hr1G101690	1	http://amigo.geneontology.org/amigo/term/GO:0016462
molecular_function	phosphotransferase activity, alcohol group as acceptor	GO:0016773	17	1709	1.42	0.136	HORVU2Hr1G002830|HORVU2Hr1G002840|HORVU4Hr1G087060|HORVU4Hr1G088650|HORVU2Hr1G002750|HORVU5Hr1G124810|HORVU2Hr1G091360|HORVU2Hr1G002690|HORVU4Hr1G088090|HORVU2Hr1G002660|HORVU5Hr1G094510|HORVU2Hr1G091090|HORVU4Hr1G087720|HORVU6Hr1G064150|HORVU5Hr1G124800|HORVU6Hr1G064110|HORVU6Hr1G064130	1	http://amigo.geneontology.org/amigo/term/GO:0016773
molecular_function	small molecule binding	GO:0036094	37	3736	1.42	0.0292	HORVU2Hr1G002660|HORVU2Hr1G002690|HORVU2Hr1G002750|HORVU2Hr1G002830|HORVU2Hr1G002840|HORVU2Hr1G003040|HORVU2Hr1G003070|HORVU2Hr1G003110|HORVU2Hr1G091090|HORVU2Hr1G091360|HORVU2Hr1G091370|HORVU2Hr1G091410|HORVU4Hr1G087060|HORVU4Hr1G087230|HORVU4Hr1G087670|HORVU4Hr1G087680|HORVU4Hr1G087720|HORVU4Hr1G087740|HORVU4Hr1G087900|HORVU4Hr1G088090|HORVU4Hr1G088270|HORVU4Hr1G088540|HORVU4Hr1G088650|HORVU5Hr…	1	http://amigo.geneontology.org/amigo/term/GO:0036094
molecular_function	carboxy-lyase activity	GO:0016831	1	101	1.42	0.509	HORVU4Hr1G088470	1	http://amigo.geneontology.org/amigo/term/GO:0016831
molecular_function	hydrolase activity, acting on acid anhydrides, in phosphorus-containing anhydrides	GO:0016818	7	710	1.41	0.355	HORVU6Hr1G063810|HORVU4Hr1G087740|HORVU6Hr1G016100|HORVU7Hr1G103800|HORVU4Hr1G087230|HORVU2Hr1G003110|HORVU7Hr1G101690	1	http://amigo.geneontology.org/amigo/term/GO:0016818
molecular_function	hydrolase activity, acting on acid anhydrides	GO:0016817	7	715	1.4	0.358	HORVU6Hr1G063810|HORVU4Hr1G087740|HORVU6Hr1G016100|HORVU7Hr1G103800|HORVU4Hr1G087230|HORVU2Hr1G003110|HORVU7Hr1G101690	1	http://amigo.geneontology.org/amigo/term/GO:0016817
molecular_function	lyase activity	GO:0016829	4	413	1.39	0.542	HORVU7Hr1G103870|HORVU2Hr1G002930|HORVU2Hr1G002880|HORVU4Hr1G088470	1	http://amigo.geneontology.org/amigo/term/GO:0016829
molecular_function	hydro-lyase activity	GO:0016836	1	105	1.36	0.523	HORVU7Hr1G103870	1	http://amigo.geneontology.org/amigo/term/GO:0016836
molecular_function	kinase activity	GO:0016301	17	1793	1.36	0.19	HORVU2Hr1G002830|HORVU2Hr1G002840|HORVU4Hr1G087060|HORVU4Hr1G088650|HORVU2Hr1G002750|HORVU5Hr1G124810|HORVU2Hr1G091360|HORVU2Hr1G002690|HORVU4Hr1G088090|HORVU2Hr1G002660|HORVU5Hr1G094510|HORVU2Hr1G091090|HORVU4Hr1G087720|HORVU6Hr1G064150|HORVU5Hr1G124800|HORVU6Hr1G064110|HORVU6Hr1G064130	1	http://amigo.geneontology.org/amigo/term/GO:0016301
molecular_function	passive transmembrane transporter activity	GO:0022803	2	211	1.36	0.662	HORVU6Hr1G064140|HORVU4Hr1G087350	1	http://amigo.geneontology.org/amigo/term/GO:0022803
molecular_function	GTPase activity	GO:0003924	2	211	1.36	0.662	HORVU4Hr1G087740|HORVU6Hr1G016100	1	http://amigo.geneontology.org/amigo/term/GO:0003924
molecular_function	channel activity	GO:0015267	2	211	1.36	0.662	HORVU6Hr1G064140|HORVU4Hr1G087350	1	http://amigo.geneontology.org/amigo/term/GO:0015267
molecular_function	electron transfer activity	GO:0009055	3	318	1.35	0.491	HORVU4Hr1G087680|HORVU6Hr1G064590|HORVU7Hr1G104180	1	http://amigo.geneontology.org/amigo/term/GO:0009055
molecular_function	oxidoreductase activity	GO:0016491	21	2260	1.33	0.19	HORVU2Hr1G002650|HORVU2Hr1G091200|HORVU2Hr1G091370|HORVU2Hr1G091430|HORVU2Hr1G091440|HORVU2Hr1G091460|HORVU4Hr1G087110|HORVU4Hr1G087560|HORVU4Hr1G087630|HORVU4Hr1G087680|HORVU4Hr1G087900|HORVU4Hr1G088340|HORVU4Hr1G088610|HORVU5Hr1G124820|HORVU6Hr1G063830|HORVU6Hr1G064170|HORVU6Hr1G064590|HORVU7Hr1G101500|HORVU7Hr1G101590|HORVU7Hr1G101610|HORVU7Hr1G104180	1	http://amigo.geneontology.org/amigo/term/GO:0016491
molecular_function	amide binding	GO:0033218	1	110	1.3	0.539	HORVU6Hr1G016280	1	http://amigo.geneontology.org/amigo/term/GO:0033218
molecular_function	S-adenosylmethionine-dependent methyltransferase activity	GO:0008757	2	221	1.3	0.67	HORVU7Hr1G103420|HORVU5Hr1G094580	1	http://amigo.geneontology.org/amigo/term/GO:0008757
molecular_function	ion binding	GO:0043167	59	6556	1.29	0.0399	HORVU2Hr1G002650|HORVU2Hr1G002660|HORVU2Hr1G002690|HORVU2Hr1G002700|HORVU2Hr1G002750|HORVU2Hr1G002830|HORVU2Hr1G002840|HORVU2Hr1G002880|HORVU2Hr1G002930|HORVU2Hr1G003040|HORVU2Hr1G003070|HORVU2Hr1G003110|HORVU2Hr1G091090|HORVU2Hr1G091220|HORVU2Hr1G091360|HORVU2Hr1G091370|HORVU2Hr1G091410|HORVU4Hr1G087060|HORVU4Hr1G087120|HORVU4Hr1G087230|HORVU4Hr1G087560|HORVU4Hr1G087630|HORVU4Hr1G087670|HORVU4Hr…	1	http://amigo.geneontology.org/amigo/term/GO:0043167
molecular_function	heme binding	GO:0020037	6	679	1.26	0.484	HORVU7Hr1G101590|HORVU4Hr1G087560|HORVU4Hr1G087630|HORVU7Hr1G101610|HORVU6Hr1G064170|HORVU2Hr1G002650	1	http://amigo.geneontology.org/amigo/term/GO:0020037
molecular_function	primary active transmembrane transporter activity	GO:0015399	3	342	1.26	0.519	HORVU4Hr1G087670|HORVU5Hr1G094430|HORVU6Hr1G064590	1	http://amigo.geneontology.org/amigo/term/GO:0015399
molecular_function	aspartic-type endopeptidase activity	GO:0004190	1	116	1.23	0.558	HORVU4Hr1G088530	1	http://amigo.geneontology.org/amigo/term/GO:0004190
molecular_function	aspartic-type peptidase activity	GO:0070001	1	116	1.23	0.558	HORVU4Hr1G088530	1	http://amigo.geneontology.org/amigo/term/GO:0070001
molecular_function	ATP-dependent activity	GO:0140657	7	814	1.23	0.521	HORVU4Hr1G087670|HORVU4Hr1G088540|HORVU6Hr1G063810|HORVU5Hr1G094430|HORVU7Hr1G103800|HORVU4Hr1G088270|HORVU7Hr1G101690	1	http://amigo.geneontology.org/amigo/term/GO:0140657
molecular_function	catalytic activity, acting on a protein	GO:0140096	28	3264	1.23	0.269	HORVU2Hr1G002660|HORVU2Hr1G002690|HORVU2Hr1G002750|HORVU2Hr1G002830|HORVU2Hr1G002840|HORVU2Hr1G091090|HORVU2Hr1G091200|HORVU2Hr1G091220|HORVU2Hr1G091360|HORVU4Hr1G087060|HORVU4Hr1G087120|HORVU4Hr1G087720|HORVU4Hr1G088090|HORVU4Hr1G088530|HORVU4Hr1G088650|HORVU4Hr1G088660|HORVU5Hr1G094510|HORVU5Hr1G124800|HORVU5Hr1G124810|HORVU6Hr1G016120|HORVU6Hr1G063860|HORVU6Hr1G063910|HORVU6Hr1G064070|HORVU6Hr…	1	http://amigo.geneontology.org/amigo/term/GO:0140096
molecular_function	ABC-type transporter activity	GO:0140359	1	117	1.22	0.561	HORVU4Hr1G087670	1	http://amigo.geneontology.org/amigo/term/GO:0140359
molecular_function	protein dimerization activity	GO:0046983	4	470	1.22	0.575	HORVU4Hr1G087580|HORVU4Hr1G087610|HORVU5Hr1G094500|HORVU4Hr1G087590	1	http://amigo.geneontology.org/amigo/term/GO:0046983
molecular_function	transferase activity, transferring one-carbon groups	GO:0016741	3	354	1.21	0.741	HORVU4Hr1G088440|HORVU7Hr1G103420|HORVU5Hr1G094580	1	http://amigo.geneontology.org/amigo/term/GO:0016741
molecular_function	hydrolase activity, acting on carbon-nitrogen (but not peptide) bonds	GO:0016810	1	118	1.21	0.564	HORVU4Hr1G088440	1	http://amigo.geneontology.org/amigo/term/GO:0016810
molecular_function	transferase activity, transferring phosphorus-containing groups	GO:0016772	17	2043	1.19	0.413	HORVU2Hr1G002830|HORVU2Hr1G002840|HORVU4Hr1G087060|HORVU4Hr1G088650|HORVU2Hr1G002750|HORVU5Hr1G124810|HORVU2Hr1G091360|HORVU2Hr1G002690|HORVU4Hr1G088090|HORVU2Hr1G002660|HORVU5Hr1G094510|HORVU2Hr1G091090|HORVU4Hr1G087720|HORVU6Hr1G064150|HORVU5Hr1G124800|HORVU6Hr1G064110|HORVU6Hr1G064130	1	http://amigo.geneontology.org/amigo/term/GO:0016772
molecular_function	transcription regulator activity	GO:0140110	10	1202	1.19	0.594	HORVU4Hr1G087580|HORVU4Hr1G087610|HORVU6Hr1G064370|HORVU6Hr1G016250|HORVU4Hr1G087700|HORVU6Hr1G016240|HORVU5Hr1G125110|HORVU5Hr1G125050|HORVU4Hr1G087590|HORVU4Hr1G087360	1	http://amigo.geneontology.org/amigo/term/GO:0140110
molecular_function	nucleoside-triphosphatase activity	GO:0017111	5	613	1.17	0.623	HORVU6Hr1G063810|HORVU4Hr1G087740|HORVU6Hr1G016100|HORVU7Hr1G103800|HORVU7Hr1G101690	1	http://amigo.geneontology.org/amigo/term/GO:0017111
molecular_function	sequence-specific DNA binding	GO:0043565	6	739	1.16	0.652	HORVU4Hr1G087580|HORVU4Hr1G087610|HORVU4Hr1G087700|HORVU6Hr1G016240|HORVU4Hr1G088280|HORVU4Hr1G088280	1	http://amigo.geneontology.org/amigo/term/GO:0043565
molecular_function	O-acyltransferase activity	GO:0008374	1	124	1.15	0.582	HORVU2Hr1G091290	1	http://amigo.geneontology.org/amigo/term/GO:0008374
molecular_function	transition metal ion binding	GO:0046914	11	1377	1.14	0.619	HORVU7Hr1G101590|HORVU4Hr1G088660|HORVU7Hr1G103870|HORVU4Hr1G087560|HORVU4Hr1G087630|HORVU7Hr1G101610|HORVU6Hr1G016120|HORVU6Hr1G064170|HORVU2Hr1G002650|HORVU4Hr1G088280|HORVU4Hr1G087120	1	http://amigo.geneontology.org/amigo/term/GO:0046914
molecular_function	tetrapyrrole binding	GO:0046906	6	752	1.14	0.657	HORVU7Hr1G101590|HORVU4Hr1G087560|HORVU4Hr1G087630|HORVU7Hr1G101610|HORVU6Hr1G064170|HORVU2Hr1G002650	1	http://amigo.geneontology.org/amigo/term/GO:0046906
molecular_function	guanyl ribonucleotide binding	GO:0032561	2	252	1.14	0.697	HORVU4Hr1G087740|HORVU6Hr1G016100	1	http://amigo.geneontology.org/amigo/term/GO:0032561
molecular_function	GTP binding	GO:0005525	2	252	1.14	0.697	HORVU4Hr1G087740|HORVU6Hr1G016100	1	http://amigo.geneontology.org/amigo/term/GO:0005525
molecular_function	catalytic activity	GO:0003824	85	10842	1.12	0.214	HORVU2Hr1G002620|HORVU2Hr1G002640|HORVU2Hr1G002650|HORVU2Hr1G002660|HORVU2Hr1G002690|HORVU2Hr1G002750|HORVU2Hr1G002830|HORVU2Hr1G002840|HORVU2Hr1G002880|HORVU2Hr1G002930|HORVU2Hr1G003110|HORVU2Hr1G091090|HORVU2Hr1G091200|HORVU2Hr1G091220|HORVU2Hr1G091270|HORVU2Hr1G091280|HORVU2Hr1G091290|HORVU2Hr1G091360|HORVU2Hr1G091370|HORVU2Hr1G091430|HORVU2Hr1G091440|HORVU2Hr1G091460|HORVU4Hr1G087060|HORVU4Hr…	1	http://amigo.geneontology.org/amigo/term/GO:0003824
molecular_function	transferase activity	GO:0016740	35	4469	1.12	0.444	HORVU2Hr1G002640|HORVU2Hr1G002660|HORVU2Hr1G002690|HORVU2Hr1G002750|HORVU2Hr1G002830|HORVU2Hr1G002840|HORVU2Hr1G091090|HORVU2Hr1G091220|HORVU2Hr1G091280|HORVU2Hr1G091290|HORVU2Hr1G091360|HORVU4Hr1G087060|HORVU4Hr1G087100|HORVU4Hr1G087120|HORVU4Hr1G087250|HORVU4Hr1G087510|HORVU4Hr1G087720|HORVU4Hr1G087910|HORVU4Hr1G088090|HORVU4Hr1G088440|HORVU4Hr1G088520|HORVU4Hr1G088650|HORVU4Hr1G088660|HORVU5Hr…	1	http://amigo.geneontology.org/amigo/term/GO:0016740
molecular_function	organic cyclic compound binding	GO:0097159	63	8046	1.12	0.323	HORVU2Hr1G002650|HORVU2Hr1G002660|HORVU2Hr1G002690|HORVU2Hr1G002750|HORVU2Hr1G002830|HORVU2Hr1G002840|HORVU2Hr1G003040|HORVU2Hr1G003070|HORVU2Hr1G003110|HORVU2Hr1G091090|HORVU2Hr1G091360|HORVU2Hr1G091370|HORVU2Hr1G091410|HORVU4Hr1G087060|HORVU4Hr1G087230|HORVU4Hr1G087560|HORVU4Hr1G087580|HORVU4Hr1G087590|HORVU4Hr1G087610|HORVU4Hr1G087630|HORVU4Hr1G087670|HORVU4Hr1G087680|HORVU4Hr1G087700|HORVU4Hr…	1	http://amigo.geneontology.org/amigo/term/GO:0097159
molecular_function	ion transmembrane transporter activity	GO:0015075	5	644	1.11	0.808	HORVU4Hr1G088020|HORVU4Hr1G087960|HORVU5Hr1G094430|HORVU4Hr1G087350|HORVU6Hr1G064010	1	http://amigo.geneontology.org/amigo/term/GO:0015075
molecular_function	guanyl nucleotide binding	GO:0019001	2	258	1.11	0.703	HORVU4Hr1G087740|HORVU6Hr1G016100	1	http://amigo.geneontology.org/amigo/term/GO:0019001
molecular_function	heterocyclic compound binding	GO:1901363	62	8034	1.1	0.362	HORVU2Hr1G002650|HORVU2Hr1G002660|HORVU2Hr1G002690|HORVU2Hr1G002750|HORVU2Hr1G002830|HORVU2Hr1G002840|HORVU2Hr1G003040|HORVU2Hr1G003070|HORVU2Hr1G003110|HORVU2Hr1G091090|HORVU2Hr1G091360|HORVU2Hr1G091370|HORVU2Hr1G091410|HORVU4Hr1G087060|HORVU4Hr1G087230|HORVU4Hr1G087560|HORVU4Hr1G087580|HORVU4Hr1G087590|HORVU4Hr1G087610|HORVU4Hr1G087630|HORVU4Hr1G087670|HORVU4Hr1G087680|HORVU4Hr1G087700|HORVU4Hr…	1	http://amigo.geneontology.org/amigo/term/GO:1901363
molecular_function	DNA-binding transcription factor activity	GO:0003700	8	1050	1.09	0.707	HORVU4Hr1G087580|HORVU4Hr1G087610|HORVU6Hr1G064370|HORVU6Hr1G016250|HORVU4Hr1G087700|HORVU6Hr1G016240|HORVU5Hr1G125110|HORVU4Hr1G087590	1	http://amigo.geneontology.org/amigo/term/GO:0003700
molecular_function	transcription regulatory region nucleic acid binding	GO:0001067	3	395	1.09	0.758	HORVU4Hr1G087580|HORVU4Hr1G087580|HORVU4Hr1G087590	1	http://amigo.geneontology.org/amigo/term/GO:0001067
molecular_function	transcription cis-regulatory region binding	GO:0000976	3	395	1.09	0.758	HORVU4Hr1G087580|HORVU4Hr1G087610|HORVU4Hr1G087590	1	http://amigo.geneontology.org/amigo/term/GO:0000976
molecular_function	transporter activity	GO:0005215	12	1584	1.08	0.756	HORVU4Hr1G088020|HORVU4Hr1G087670|HORVU5Hr1G124880|HORVU4Hr1G087960|HORVU6Hr1G064140|HORVU5Hr1G094430|HORVU6Hr1G064590|HORVU4Hr1G088060|HORVU6Hr1G064430|HORVU6Hr1G064220|HORVU4Hr1G087350|HORVU6Hr1G064010	1	http://amigo.geneontology.org/amigo/term/GO:0005215
molecular_function	hydrolase activity	GO:0016787	25	3334	1.07	0.663	HORVU2Hr1G002620|HORVU2Hr1G003110|HORVU2Hr1G091270|HORVU4Hr1G087230|HORVU4Hr1G087340|HORVU4Hr1G087400|HORVU4Hr1G087430|HORVU4Hr1G087740|HORVU4Hr1G087990|HORVU4Hr1G088270|HORVU4Hr1G088440|HORVU4Hr1G088530|HORVU4Hr1G088720|HORVU5Hr1G124750|HORVU5Hr1G124980|HORVU5Hr1G125000|HORVU6Hr1G015670|HORVU6Hr1G016100|HORVU6Hr1G063810|HORVU6Hr1G063860|HORVU6Hr1G063910|HORVU6Hr1G064070|HORVU7Hr1G101470|HORVU7Hr…	1	http://amigo.geneontology.org/amigo/term/GO:0016787
molecular_function	ATP hydrolysis activity	GO:0016887	3	403	1.07	0.762	HORVU6Hr1G063810|HORVU7Hr1G103800|HORVU7Hr1G101690	1	http://amigo.geneontology.org/amigo/term/GO:0016887
molecular_function	metal ion binding	GO:0046872	24	3256	1.05	0.741	HORVU2Hr1G002650|HORVU2Hr1G002700|HORVU2Hr1G002880|HORVU2Hr1G002930|HORVU2Hr1G091220|HORVU4Hr1G087120|HORVU4Hr1G087560|HORVU4Hr1G087630|HORVU4Hr1G088280|HORVU4Hr1G088340|HORVU4Hr1G088350|HORVU4Hr1G088610|HORVU4Hr1G088660|HORVU5Hr1G094430|HORVU5Hr1G125030|HORVU6Hr1G016120|HORVU6Hr1G064170|HORVU6Hr1G064450|HORVU7Hr1G101310|HORVU7Hr1G101500|HORVU7Hr1G101590|HORVU7Hr1G101610|HORVU7Hr1G101640|HORVU7Hr…	1	http://amigo.geneontology.org/amigo/term/GO:0046872
molecular_function	sequence-specific double-stranded DNA binding	GO:1990837	3	409	1.05	0.765	HORVU4Hr1G087580|HORVU4Hr1G087610|HORVU4Hr1G087590	1	http://amigo.geneontology.org/amigo/term/GO:1990837
molecular_function	binding	GO:0005488	83	11349	1.05	0.633	HORVU2Hr1G002650|HORVU2Hr1G002660|HORVU2Hr1G002690|HORVU2Hr1G002700|HORVU2Hr1G002750|HORVU2Hr1G002830|HORVU2Hr1G002840|HORVU2Hr1G002880|HORVU2Hr1G002930|HORVU2Hr1G003040|HORVU2Hr1G003070|HORVU2Hr1G003110|HORVU2Hr1G091090|HORVU2Hr1G091220|HORVU2Hr1G091360|HORVU2Hr1G091370|HORVU2Hr1G091410|HORVU4Hr1G087060|HORVU4Hr1G087120|HORVU4Hr1G087230|HORVU4Hr1G087560|HORVU4Hr1G087580|HORVU4Hr1G087590|HORVU4Hr…	1	http://amigo.geneontology.org/amigo/term/GO:0005488
molecular_function	cation binding	GO:0043169	24	3287	1.04	0.826	HORVU2Hr1G002650|HORVU2Hr1G002700|HORVU2Hr1G002880|HORVU2Hr1G002930|HORVU2Hr1G091220|HORVU4Hr1G087120|HORVU4Hr1G087560|HORVU4Hr1G087630|HORVU4Hr1G088280|HORVU4Hr1G088340|HORVU4Hr1G088350|HORVU4Hr1G088610|HORVU4Hr1G088660|HORVU5Hr1G094430|HORVU5Hr1G125030|HORVU6Hr1G016120|HORVU6Hr1G064170|HORVU6Hr1G064450|HORVU7Hr1G101310|HORVU7Hr1G101500|HORVU7Hr1G101590|HORVU7Hr1G101610|HORVU7Hr1G101640|HORVU7Hr…	1	http://amigo.geneontology.org/amigo/term/GO:0043169
molecular_function	unfolded protein binding	GO:0051082	1	137	1.04	0.618	HORVU6Hr1G016080	1	http://amigo.geneontology.org/amigo/term/GO:0051082
molecular_function	oxidoreduction-driven active transmembrane transporter activity	GO:0015453	1	138	1.04	0.621	HORVU6Hr1G064590	1	http://amigo.geneontology.org/amigo/term/GO:0015453
molecular_function	transmembrane transporter activity	GO:0022857	11	1534	1.03	0.875	HORVU4Hr1G088020|HORVU4Hr1G087670|HORVU5Hr1G124880|HORVU4Hr1G087960|HORVU6Hr1G064140|HORVU5Hr1G094430|HORVU6Hr1G064590|HORVU6Hr1G064430|HORVU6Hr1G064220|HORVU4Hr1G087350|HORVU6Hr1G064010	1	http://amigo.geneontology.org/amigo/term/GO:0022857
molecular_function	DNA binding	GO:0003677	16	2233	1.03	0.895	HORVU4Hr1G087580|HORVU6Hr1G015950|HORVU4Hr1G088540|HORVU4Hr1G087750|HORVU4Hr1G087730|HORVU6Hr1G063900|HORVU6Hr1G016240|HORVU5Hr1G125110|HORVU4Hr1G088280|HORVU5Hr1G094500|HORVU6Hr1G016290|HORVU4Hr1G087590|HORVU7Hr1G101270|HORVU4Hr1G087610|HORVU6Hr1G064370|HORVU4Hr1G087700	1	http://amigo.geneontology.org/amigo/term/GO:0003677
molecular_function	protein binding	GO:0005515	12	1708	1.01	0.882	HORVU4Hr1G087580|HORVU7Hr1G103330|HORVU6Hr1G016080|HORVU5Hr1G124770|HORVU2Hr1G002700|HORVU6Hr1G016200|HORVU4Hr1G087610|HORVU2Hr1G091220|HORVU6Hr1G063900|HORVU7Hr1G103380|HORVU5Hr1G094500|HORVU4Hr1G087590	1	http://amigo.geneontology.org/amigo/term/GO:0005515
molecular_function	zinc ion binding	GO:0008270	5	732	0.98	1	HORVU4Hr1G088660|HORVU7Hr1G103870|HORVU6Hr1G016120|HORVU4Hr1G088280|HORVU4Hr1G087120	1	http://amigo.geneontology.org/amigo/term/GO:0008270
molecular_function	inorganic molecular entity transmembrane transporter activity	GO:0015318	4	601	0.95	1	HORVU4Hr1G088020|HORVU6Hr1G064140|HORVU5Hr1G094430|HORVU4Hr1G087350	1	http://amigo.geneontology.org/amigo/term/GO:0015318
molecular_function	endopeptidase activity	GO:0004175	3	455	0.94	1	HORVU6Hr1G063860|HORVU4Hr1G088530|HORVU6Hr1G064070	1	http://amigo.geneontology.org/amigo/term/GO:0004175
molecular_function	cation transmembrane transporter activity	GO:0008324	3	455	0.94	1	HORVU4Hr1G087960|HORVU5Hr1G094430|HORVU6Hr1G064010	1	http://amigo.geneontology.org/amigo/term/GO:0008324
molecular_function	carbon-carbon lyase activity	GO:0016830	1	158	0.91	1	HORVU4Hr1G088470	1	http://amigo.geneontology.org/amigo/term/GO:0016830
molecular_function	hydrolase activity, hydrolyzing O-glycosyl compounds	GO:0004553	3	480	0.89	1	HORVU2Hr1G091270|HORVU4Hr1G087990|HORVU6Hr1G015670	1	http://amigo.geneontology.org/amigo/term/GO:0004553
molecular_function	active transmembrane transporter activity	GO:0022804	4	647	0.88	1	HORVU4Hr1G087670|HORVU5Hr1G124880|HORVU5Hr1G094430|HORVU6Hr1G064590	1	http://amigo.geneontology.org/amigo/term/GO:0022804
molecular_function	mRNA binding	GO:0003729	2	337	0.85	1	HORVU7Hr1G103330|HORVU7Hr1G103380	1	http://amigo.geneontology.org/amigo/term/GO:0003729
molecular_function	methyltransferase activity	GO:0008168	2	340	0.84	1	HORVU7Hr1G103420|HORVU5Hr1G094580	1	http://amigo.geneontology.org/amigo/term/GO:0008168
molecular_function	ion channel activity	GO:0005216	1	171	0.84	1	HORVU4Hr1G087350	1	http://amigo.geneontology.org/amigo/term/GO:0005216
molecular_function	protein heterodimerization activity	GO:0046982	1	172	0.83	1	HORVU5Hr1G094500	1	http://amigo.geneontology.org/amigo/term/GO:0046982
molecular_function	calcium ion binding	GO:0005509	2	344	0.83	1	HORVU7Hr1G101500|HORVU7Hr1G101640	1	http://amigo.geneontology.org/amigo/term/GO:0005509
molecular_function	enzyme regulator activity	GO:0030234	3	517	0.83	1	HORVU7Hr1G101390|HORVU7Hr1G103510|HORVU5Hr1G124670	1	http://amigo.geneontology.org/amigo/term/GO:0030234
molecular_function	double-stranded DNA binding	GO:0003690	3	526	0.82	1	HORVU4Hr1G087580|HORVU4Hr1G087610|HORVU4Hr1G087590	1	http://amigo.geneontology.org/amigo/term/GO:0003690
molecular_function	peptidase activity	GO:0008233	4	716	0.8	0.822	HORVU6Hr1G063860|HORVU6Hr1G063910|HORVU4Hr1G088530|HORVU6Hr1G064070	1	http://amigo.geneontology.org/amigo/term/GO:0008233
molecular_function	UDP-glycosyltransferase activity	GO:0008194	2	364	0.79	1	HORVU4Hr1G088520|HORVU5Hr1G094450	1	http://amigo.geneontology.org/amigo/term/GO:0008194
molecular_function	molecular function regulator	GO:0098772	3	548	0.78	1	HORVU7Hr1G101390|HORVU7Hr1G103510|HORVU5Hr1G124670	1	http://amigo.geneontology.org/amigo/term/GO:0098772
molecular_function	nucleic acid binding	GO:0003676	21	3902	0.77	0.222	HORVU4Hr1G087580|HORVU4Hr1G087590|HORVU4Hr1G087610|HORVU4Hr1G087700|HORVU4Hr1G087730|HORVU4Hr1G087750|HORVU4Hr1G088270|HORVU4Hr1G088280|HORVU4Hr1G088540|HORVU5Hr1G094500|HORVU5Hr1G124960|HORVU5Hr1G125110|HORVU6Hr1G015950|HORVU6Hr1G016240|HORVU6Hr1G016290|HORVU6Hr1G063900|HORVU6Hr1G064120|HORVU6Hr1G064370|HORVU7Hr1G101270|HORVU7Hr1G103330|HORVU7Hr1G103380	1	http://amigo.geneontology.org/amigo/term/GO:0003676
molecular_function	antiporter activity	GO:0015297	1	187	0.77	1	HORVU5Hr1G124880	1	http://amigo.geneontology.org/amigo/term/GO:0015297
molecular_function	structural molecule activity	GO:0005198	3	603	0.71	0.803	HORVU4Hr1G087880|HORVU4Hr1G087850|HORVU4Hr1G087740|HORVU4Hr1G088390	1	http://amigo.geneontology.org/amigo/term/GO:0005198
molecular_function	metal ion transmembrane transporter activity	GO:0046873	1	203	0.7	1	HORVU5Hr1G094430	1	http://amigo.geneontology.org/amigo/term/GO:0046873
molecular_function	active ion transmembrane transporter activity	GO:0022853	1	209	0.68	1	HORVU5Hr1G094430	1	http://amigo.geneontology.org/amigo/term/GO:0022853
molecular_function	glycosyltransferase activity	GO:0016757	3	729	0.59	0.498	HORVU2Hr1G091280|HORVU4Hr1G088520|HORVU5Hr1G094450	1	http://amigo.geneontology.org/amigo/term/GO:0016757
molecular_function	RNA polymerase II transcription regulatory region sequence-specific DNA binding	GO:0000977	1	257	0.56	1	HORVU4Hr1G087580	1	http://amigo.geneontology.org/amigo/term/GO:0000977
molecular_function	peroxidase activity	GO:0004601	1	257	0.56	1	HORVU6Hr1G063830	1	http://amigo.geneontology.org/amigo/term/GO:0004601
molecular_function	oxidoreductase activity, acting on peroxide as acceptor	GO:0016684	1	258	0.55	1	HORVU6Hr1G063830	1	http://amigo.geneontology.org/amigo/term/GO:0016684
molecular_function	DNA-binding transcription factor activity, RNA polymerase II-specific	GO:0000981	1	267	0.54	1	HORVU4Hr1G087580	1	http://amigo.geneontology.org/amigo/term/GO:0000981
molecular_function	RNA binding	GO:0003723	5	1400	0.51	0.139	HORVU5Hr1G124960|HORVU7Hr1G103330|HORVU7Hr1G103380|HORVU4Hr1G088270|HORVU6Hr1G064120	1	http://amigo.geneontology.org/amigo/term/GO:0003723
molecular_function	antioxidant activity	GO:0016209	1	284	0.5	1	HORVU6Hr1G063830	1	http://amigo.geneontology.org/amigo/term/GO:0016209
molecular_function	secondary active transmembrane transporter activity	GO:0015291	1	305	0.47	0.728	HORVU5Hr1G124880	1	http://amigo.geneontology.org/amigo/term/GO:0015291
molecular_function	hydrolase activity, acting on ester bonds	GO:0016788	3	1074	0.4	0.131	HORVU5Hr1G124980|HORVU4Hr1G088720|HORVU5Hr1G125000	1	http://amigo.geneontology.org/amigo/term/GO:0016788
molecular_function	hexosyltransferase activity	GO:0016758	1	386	0.37	0.531	HORVU4Hr1G088520	1	http://amigo.geneontology.org/amigo/term/GO:0016758
molecular_function	inorganic cation transmembrane transporter activity	GO:0022890	1	416	0.34	0.378	HORVU5Hr1G094430	1	http://amigo.geneontology.org/amigo/term/GO:0022890
molecular_function	structural constituent of ribosome	GO:0003735	1	528	0.27	0.28	HORVU4Hr1G087880	1	http://amigo.geneontology.org/amigo/term/GO:0003735
biological_process	7-methylguanosine metabolic process	GO:0008618	1	1	> 100	0.0138	HORVU5Hr1G094580	1	http://amigo.geneontology.org/amigo/term/GO:0008618
biological_process	guanosine-containing compound metabolic process	GO:1901068	1	1	> 100	0.0138	HORVU5Hr1G094580	1	http://amigo.geneontology.org/amigo/term/GO:1901068
biological_process	nucleotide-excision repair, preincision complex assembly	GO:0006294	1	1	> 100	0.0138	HORVU4Hr1G088690	1	http://amigo.geneontology.org/amigo/term/GO:0006294
biological_process	regulation of chromatin assembly	GO:0010847	1	2	71.55	0.0207	HORVU6Hr1G063900	1	http://amigo.geneontology.org/amigo/term/GO:0010847
biological_process	transposition	GO:0032196	1	2	71.55	0.0207	HORVU6Hr1G063930	1	http://amigo.geneontology.org/amigo/term/GO:0032196
biological_process	regulation of chromatin organization	GO:1902275	1	3	47.7	0.0275	HORVU6Hr1G063900	1	http://amigo.geneontology.org/amigo/term/GO:1902275
biological_process	regulation of chromatin assembly or disassembly	GO:0001672	1	3	47.7	0.0275	HORVU6Hr1G063900	1	http://amigo.geneontology.org/amigo/term/GO:0001672
biological_process	microsporogenesis	GO:0009556	1	3	47.7	0.0275	HORVU4Hr1G087200	1	http://amigo.geneontology.org/amigo/term/GO:0009556
biological_process	sexual sporulation	GO:0034293	1	4	35.78	0.0342	HORVU4Hr1G087200	1	http://amigo.geneontology.org/amigo/term/GO:0034293
biological_process	plant-type sporogenesis	GO:0048236	1	4	35.78	0.0342	HORVU4Hr1G087200	1	http://amigo.geneontology.org/amigo/term/GO:0048236
biological_process	sporulation	GO:0043934	1	4	35.78	0.0342	HORVU4Hr1G087200	1	http://amigo.geneontology.org/amigo/term/GO:0043934
biological_process	tRNA dihydrouridine synthesis	GO:0002943	1	4	35.78	0.0342	HORVU2Hr1G091370	1	http://amigo.geneontology.org/amigo/term/GO:0002943
biological_process	carbon utilization	GO:0015976	1	4	35.78	0.0342	HORVU7Hr1G103870	1	http://amigo.geneontology.org/amigo/term/GO:0015976
biological_process	tRNA (guanine-N7)-methylation	GO:0106004	1	5	28.62	0.0409	HORVU5Hr1G094580	1	http://amigo.geneontology.org/amigo/term/GO:0106004
biological_process	ether metabolic process	GO:0018904	1	5	28.62	0.0409	HORVU2Hr1G091200	1	http://amigo.geneontology.org/amigo/term/GO:0018904
biological_process	glycerol ether metabolic process	GO:0006662	1	5	28.62	0.0409	HORVU2Hr1G091200	1	http://amigo.geneontology.org/amigo/term/GO:0006662
biological_process	ribosomal small subunit export from nucleus	GO:0000056	1	5	28.62	0.0409	HORVU5Hr1G124770	1	http://amigo.geneontology.org/amigo/term/GO:0000056
biological_process	histone H3-K36 methylation	GO:0010452	1	5	28.62	0.0409	HORVU7Hr1G103420	1	http://amigo.geneontology.org/amigo/term/GO:0010452
biological_process	S-adenosyl-L-methionine transport	GO:0015805	1	6	23.85	0.0476	HORVU6Hr1G064010	1	http://amigo.geneontology.org/amigo/term/GO:0015805
biological_process	histone exchange	GO:0043486	1	6	23.85	0.0476	HORVU6Hr1G063900	1	http://amigo.geneontology.org/amigo/term/GO:0043486
biological_process	regulation of ER to Golgi vesicle-mediated transport by GTP hydrolysis	GO:0090113	1	6	23.85	0.0476	HORVU7Hr1G103510	1	http://amigo.geneontology.org/amigo/term/GO:0090113
biological_process	regulation of COPII vesicle coating	GO:0003400	1	6	23.85	0.0476	HORVU7Hr1G103510	1	http://amigo.geneontology.org/amigo/term/GO:0003400
biological_process	S-adenosyl-L-methionine transmembrane transport	GO:1901962	1	6	23.85	0.0476	HORVU6Hr1G064010	1	http://amigo.geneontology.org/amigo/term/GO:1901962
biological_process	ribosomal large subunit export from nucleus	GO:0000055	1	6	23.85	0.0476	HORVU5Hr1G124770	1	http://amigo.geneontology.org/amigo/term/GO:0000055
biological_process	nucleoside diphosphate catabolic process	GO:0009134	2	13	22.02	0.00474	HORVU4Hr1G087230|HORVU2Hr1G003110	1	http://amigo.geneontology.org/amigo/term/GO:0009134
biological_process	response to high light intensity	GO:0009644	1	7	20.44	0.0542	HORVU4Hr1G088610	1	http://amigo.geneontology.org/amigo/term/GO:0009644
biological_process	embryo sac development	GO:0009553	1	7	20.44	0.0542	HORVU4Hr1G087200	1	http://amigo.geneontology.org/amigo/term/GO:0009553
biological_process	vacuolar protein processing	GO:0006624	1	7	20.44	0.0542	HORVU6Hr1G064230	1	http://amigo.geneontology.org/amigo/term/GO:0006624
biological_process	organic cation transport	GO:0015695	1	8	17.89	0.0608	HORVU6Hr1G064010	1	http://amigo.geneontology.org/amigo/term/GO:0015695
biological_process	fatty acid beta-oxidation using acyl-CoA dehydrogenase	GO:0033539	1	8	17.89	0.0608	HORVU4Hr1G087680	1	http://amigo.geneontology.org/amigo/term/GO:0033539
biological_process	xylan catabolic process	GO:0045493	1	8	17.89	0.0608	HORVU2Hr1G091270	1	http://amigo.geneontology.org/amigo/term/GO:0045493
biological_process	cell wall polysaccharide catabolic process	GO:0044347	1	8	17.89	0.0608	HORVU2Hr1G091270	1	http://amigo.geneontology.org/amigo/term/GO:0044347
biological_process	arabinan catabolic process	GO:0031222	1	8	17.89	0.0608	HORVU2Hr1G091270	1	http://amigo.geneontology.org/amigo/term/GO:0031222
biological_process	arabinan metabolic process	GO:0031221	1	8	17.89	0.0608	HORVU2Hr1G091270	1	http://amigo.geneontology.org/amigo/term/GO:0031221
biological_process	ubiquitin-dependent protein catabolic process via the N-end rule pathway	GO:0071596	1	8	17.89	0.0608	HORVU4Hr1G088660	1	http://amigo.geneontology.org/amigo/term/GO:0071596
biological_process	regulation of ER to Golgi vesicle-mediated transport	GO:0060628	1	8	17.89	0.0608	HORVU7Hr1G103510	1	http://amigo.geneontology.org/amigo/term/GO:0060628
biological_process	purine ribonucleoside metabolic process	GO:0046128	1	9	15.9	0.0673	HORVU5Hr1G094580	1	http://amigo.geneontology.org/amigo/term/GO:0046128
biological_process	RNA (guanine-N7)-methylation	GO:0036265	1	9	15.9	0.0673	HORVU5Hr1G094580	1	http://amigo.geneontology.org/amigo/term/GO:0036265
biological_process	regulation of intracellular transport	GO:0032386	1	9	15.9	0.0673	HORVU7Hr1G103510	1	http://amigo.geneontology.org/amigo/term/GO:0032386
biological_process	meiotic DNA double-strand break formation	GO:0042138	1	9	15.9	0.0673	HORVU4Hr1G087200	1	http://amigo.geneontology.org/amigo/term/GO:0042138
biological_process	protein export from nucleus	GO:0006611	1	9	15.9	0.0673	HORVU5Hr1G124770	1	http://amigo.geneontology.org/amigo/term/GO:0006611
biological_process	response to disaccharide	GO:0034285	1	10	14.31	0.0737	HORVU2Hr1G002630	1	http://amigo.geneontology.org/amigo/term/GO:0034285
biological_process	response to sucrose	GO:0009744	1	10	14.31	0.0737	HORVU2Hr1G002630	1	http://amigo.geneontology.org/amigo/term/GO:0009744
biological_process	protein autoprocessing	GO:0016540	1	10	14.31	0.0737	HORVU4Hr1G088470	1	http://amigo.geneontology.org/amigo/term/GO:0016540
biological_process	regulation of DNA-templated transcription, initiation	GO:2000142	1	10	14.31	0.0737	HORVU5Hr1G125110	1	http://amigo.geneontology.org/amigo/term/GO:2000142
biological_process	suberin biosynthetic process	GO:0010345	2	21	13.63	0.011	HORVU5Hr1G124820|HORVU4Hr1G087110	1	http://amigo.geneontology.org/amigo/term/GO:0010345
biological_process	long-chain fatty-acyl-CoA metabolic process	GO:0035336	2	21	13.63	0.011	HORVU5Hr1G124820|HORVU4Hr1G087110	1	http://amigo.geneontology.org/amigo/term/GO:0035336
biological_process	fatty-acyl-CoA metabolic process	GO:0035337	2	22	13.01	0.012	HORVU5Hr1G124820|HORVU4Hr1G087110	1	http://amigo.geneontology.org/amigo/term/GO:0035337
biological_process	regulation of cellular localization	GO:0060341	1	11	13.01	0.0802	HORVU7Hr1G103510	1	http://amigo.geneontology.org/amigo/term/GO:0060341
biological_process	protein localization to extracellular region	GO:0071692	1	11	13.01	0.0802	HORVU7Hr1G103510	1	http://amigo.geneontology.org/amigo/term/GO:0071692
biological_process	protein secretion	GO:0009306	1	11	13.01	0.0802	HORVU7Hr1G103510	1	http://amigo.geneontology.org/amigo/term/GO:0009306
biological_process	establishment of protein localization to extracellular region	GO:0035592	1	11	13.01	0.0802	HORVU7Hr1G103510	1	http://amigo.geneontology.org/amigo/term/GO:0035592
biological_process	cold acclimation	GO:0009631	1	12	11.93	0.0866	HORVU6Hr1G064620	1	http://amigo.geneontology.org/amigo/term/GO:0009631
biological_process	protein localization to plasma membrane	GO:0072659	1	12	11.93	0.0866	HORVU2Hr1G091290	1	http://amigo.geneontology.org/amigo/term/GO:0072659
biological_process	protein localization to cell periphery	GO:1990778	1	12	11.93	0.0866	HORVU2Hr1G091290	1	http://amigo.geneontology.org/amigo/term/GO:1990778
biological_process	multi-organism reproductive process	GO:0044703	4	51	11.22	0.000585	HORVU4Hr1G087070|HORVU4Hr1G088140|HORVU4Hr1G087200|HORVU4Hr1G088080	0.833	http://amigo.geneontology.org/amigo/term/GO:0044703
biological_process	sexual reproduction	GO:0019953	4	51	11.22	0.000585	HORVU4Hr1G087070|HORVU4Hr1G088140|HORVU4Hr1G087200|HORVU4Hr1G088080	0.624	http://amigo.geneontology.org/amigo/term/GO:0019953
biological_process	cadmium ion transport	GO:0015691	1	13	11.01	0.0929	HORVU5Hr1G094430	1	http://amigo.geneontology.org/amigo/term/GO:0015691
biological_process	modulation of process of other organism	GO:0035821	4	52	11.01	0.000626	HORVU4Hr1G087400|HORVU7Hr1G101470|HORVU4Hr1G087430|HORVU4Hr1G087340	0.535	http://amigo.geneontology.org/amigo/term/GO:0035821
biological_process	cadmium ion transmembrane transport	GO:0070574	1	13	11.01	0.0929	HORVU5Hr1G094430	1	http://amigo.geneontology.org/amigo/term/GO:0070574
biological_process	response to light intensity	GO:0009642	1	14	10.22	0.0992	HORVU4Hr1G088610	1	http://amigo.geneontology.org/amigo/term/GO:0009642
biological_process	fatty acid derivative metabolic process	GO:1901568	2	28	10.22	0.0184	HORVU5Hr1G124820|HORVU4Hr1G087110	1	http://amigo.geneontology.org/amigo/term/GO:1901568
biological_process	mitochondrial respiratory chain complex I assembly	GO:0032981	1	14	10.22	0.0992	HORVU6Hr1G015900	1	http://amigo.geneontology.org/amigo/term/GO:0032981
biological_process	nucleoside phosphate catabolic process	GO:1901292	2	29	9.87	0.0195	HORVU4Hr1G087230|HORVU2Hr1G003110	1	http://amigo.geneontology.org/amigo/term/GO:1901292
biological_process	'de novo' IMP biosynthetic process	GO:0006189	1	15	9.54	0.105	HORVU4Hr1G088440	1	http://amigo.geneontology.org/amigo/term/GO:0006189
biological_process	positive regulation of growth	GO:0045927	1	15	9.54	0.105	HORVU5Hr1G124940	1	http://amigo.geneontology.org/amigo/term/GO:0045927
biological_process	sterol transport	GO:0015918	1	15	9.54	0.105	HORVU4Hr1G088060	1	http://amigo.geneontology.org/amigo/term/GO:0015918
biological_process	negative regulation of translation	GO:0017148	5	79	9.06	0.000305	HORVU4Hr1G087400|HORVU7Hr1G101470|HORVU4Hr1G087430|HORVU4Hr1G088210|HORVU4Hr1G087340	1	http://amigo.geneontology.org/amigo/term/GO:0017148
biological_process	negative regulation of cellular amide metabolic process	GO:0034249	5	80	8.94	0.000323	HORVU4Hr1G087400|HORVU7Hr1G101470|HORVU4Hr1G087430|HORVU4Hr1G088210|HORVU4Hr1G087340	0.689	http://amigo.geneontology.org/amigo/term/GO:0034249
biological_process	ribosome localization	GO:0033750	1	16	8.94	0.112	HORVU5Hr1G124770	1	http://amigo.geneontology.org/amigo/term/GO:0033750
biological_process	NADH dehydrogenase complex assembly	GO:0010257	1	16	8.94	0.112	HORVU6Hr1G015900	1	http://amigo.geneontology.org/amigo/term/GO:0010257
biological_process	NADH oxidation	GO:0006116	1	16	8.94	0.112	HORVU7Hr1G101500	1	http://amigo.geneontology.org/amigo/term/GO:0006116
biological_process	regulation of circadian rhythm	GO:0042752	1	16	8.94	0.112	HORVU4Hr1G088010	1	http://amigo.geneontology.org/amigo/term/GO:0042752
biological_process	phosphatidylethanolamine biosynthetic process	GO:0006646	1	16	8.94	0.112	HORVU4Hr1G088470	1	http://amigo.geneontology.org/amigo/term/GO:0006646
biological_process	ribosomal subunit export from nucleus	GO:0000054	1	16	8.94	0.112	HORVU5Hr1G124770	1	http://amigo.geneontology.org/amigo/term/GO:0000054
biological_process	phosphatidylethanolamine metabolic process	GO:0046337	1	16	8.94	0.112	HORVU4Hr1G088470	1	http://amigo.geneontology.org/amigo/term/GO:0046337
biological_process	regulation of vesicle-mediated transport	GO:0060627	1	17	8.42	0.118	HORVU7Hr1G103510	1	http://amigo.geneontology.org/amigo/term/GO:0060627
biological_process	ribonucleoside metabolic process	GO:0009119	1	18	7.95	0.124	HORVU5Hr1G094580	1	http://amigo.geneontology.org/amigo/term/GO:0009119
biological_process	cytokinin biosynthetic process	GO:0009691	1	18	7.95	0.124	HORVU5Hr1G124750	1	http://amigo.geneontology.org/amigo/term/GO:0009691
biological_process	IMP biosynthetic process	GO:0006188	1	18	7.95	0.124	HORVU4Hr1G088440	1	http://amigo.geneontology.org/amigo/term/GO:0006188
biological_process	activation of GTPase activity	GO:0090630	1	18	7.95	0.124	HORVU5Hr1G124670	1	http://amigo.geneontology.org/amigo/term/GO:0090630
biological_process	organic hydroxy compound transport	GO:0015850	1	19	7.53	0.13	HORVU4Hr1G088060	1	http://amigo.geneontology.org/amigo/term/GO:0015850
biological_process	regulation of jasmonic acid mediated signaling pathway	GO:2000022	1	19	7.53	0.13	HORVU4Hr1G087520	1	http://amigo.geneontology.org/amigo/term/GO:2000022
biological_process	response to nitrate	GO:0010167	1	19	7.53	0.13	HORVU4Hr1G088020	1	http://amigo.geneontology.org/amigo/term/GO:0010167
biological_process	retrograde vesicle-mediated transport, Golgi to endoplasmic reticulum	GO:0006890	2	39	7.34	0.0329	HORVU2Hr1G091230|HORVU4Hr1G088390	1	http://amigo.geneontology.org/amigo/term/GO:0006890
biological_process	nitrate transport	GO:0015706	1	20	7.16	0.136	HORVU4Hr1G088020	1	http://amigo.geneontology.org/amigo/term/GO:0015706
biological_process	protein-containing complex localization	GO:0031503	1	20	7.16	0.136	HORVU5Hr1G124770	1	http://amigo.geneontology.org/amigo/term/GO:0031503
biological_process	IMP metabolic process	GO:0046040	1	20	7.16	0.136	HORVU4Hr1G088440	1	http://amigo.geneontology.org/amigo/term/GO:0046040
biological_process	NADH metabolic process	GO:0006734	1	20	7.16	0.136	HORVU7Hr1G101500	1	http://amigo.geneontology.org/amigo/term/GO:0006734
biological_process	polyketide biosynthetic process	GO:0030639	1	20	7.16	0.136	HORVU2Hr1G002640	1	http://amigo.geneontology.org/amigo/term/GO:0030639
biological_process	polyketide metabolic process	GO:0030638	1	20	7.16	0.136	HORVU2Hr1G002640	1	http://amigo.geneontology.org/amigo/term/GO:0030638
biological_process	NAD metabolic process	GO:0019674	1	20	7.16	0.136	HORVU7Hr1G101500	1	http://amigo.geneontology.org/amigo/term/GO:0019674
biological_process	pollen development	GO:0009555	1	21	6.81	0.142	HORVU4Hr1G087200	1	http://amigo.geneontology.org/amigo/term/GO:0009555
biological_process	positive regulation of GTPase activity	GO:0043547	1	22	6.5	0.148	HORVU5Hr1G124670	1	http://amigo.geneontology.org/amigo/term/GO:0043547
biological_process	purine nucleoside metabolic process	GO:0042278	1	22	6.5	0.148	HORVU5Hr1G094580	1	http://amigo.geneontology.org/amigo/term/GO:0042278
biological_process	zinc ion transport	GO:0006829	1	23	6.22	0.154	HORVU5Hr1G094430	1	http://amigo.geneontology.org/amigo/term/GO:0006829
biological_process	zinc ion transmembrane transport	GO:0071577	1	23	6.22	0.154	HORVU5Hr1G094430	1	http://amigo.geneontology.org/amigo/term/GO:0071577
biological_process	branched-chain amino acid biosynthetic process	GO:0009082	1	24	5.96	0.16	HORVU4Hr1G087100	1	http://amigo.geneontology.org/amigo/term/GO:0009082
biological_process	regulation of GTPase activity	GO:0043087	1	24	5.96	0.16	HORVU5Hr1G124670	1	http://amigo.geneontology.org/amigo/term/GO:0043087
biological_process	cell wall macromolecule catabolic process	GO:0016998	1	25	5.72	0.166	HORVU2Hr1G091270	1	http://amigo.geneontology.org/amigo/term/GO:0016998
biological_process	regulation of cellular component biogenesis	GO:0044087	2	50	5.72	0.0507	HORVU7Hr1G103510|HORVU6Hr1G063900	1	http://amigo.geneontology.org/amigo/term/GO:0044087
biological_process	thioester metabolic process	GO:0035383	2	50	5.72	0.0507	HORVU5Hr1G124820|HORVU4Hr1G087110	1	http://amigo.geneontology.org/amigo/term/GO:0035383
biological_process	chromosome organization involved in meiotic cell cycle	GO:0070192	1	25	5.72	0.166	HORVU4Hr1G087200	1	http://amigo.geneontology.org/amigo/term/GO:0070192
biological_process	acyl-CoA metabolic process	GO:0006637	2	50	5.72	0.0507	HORVU5Hr1G124820|HORVU4Hr1G087110	1	http://amigo.geneontology.org/amigo/term/GO:0006637
biological_process	secondary metabolite biosynthetic process	GO:0044550	3	76	5.65	0.0177	HORVU2Hr1G002640|HORVU5Hr1G124820|HORVU4Hr1G087110	1	http://amigo.geneontology.org/amigo/term/GO:0044550
biological_process	phenylpropanoid biosynthetic process	GO:0009699	2	51	5.61	0.0524	HORVU5Hr1G124820|HORVU4Hr1G087110	1	http://amigo.geneontology.org/amigo/term/GO:0009699
biological_process	gametophyte development	GO:0048229	1	26	5.5	0.171	HORVU4Hr1G087200	1	http://amigo.geneontology.org/amigo/term/GO:0048229
biological_process	ER-associated misfolded protein catabolic process	GO:0071712	1	26	5.5	0.171	HORVU2Hr1G091220	1	http://amigo.geneontology.org/amigo/term/GO:0071712
biological_process	Golgi organization	GO:0007030	1	26	5.5	0.171	HORVU5Hr1G094410	1	http://amigo.geneontology.org/amigo/term/GO:0007030
biological_process	pectin catabolic process	GO:0045490	2	53	5.4	0.056	HORVU2Hr1G002930|HORVU2Hr1G002880	1	http://amigo.geneontology.org/amigo/term/GO:0045490
biological_process	purine ribonucleoside monophosphate biosynthetic process	GO:0009168	1	27	5.3	0.177	HORVU4Hr1G088440	1	http://amigo.geneontology.org/amigo/term/GO:0009168
biological_process	purine nucleoside monophosphate biosynthetic process	GO:0009127	1	27	5.3	0.177	HORVU4Hr1G088440	1	http://amigo.geneontology.org/amigo/term/GO:0009127
biological_process	water transport	GO:0006833	1	27	5.3	0.177	HORVU6Hr1G064140	1	http://amigo.geneontology.org/amigo/term/GO:0006833
biological_process	fluid transport	GO:0042044	1	27	5.3	0.177	HORVU6Hr1G064140	1	http://amigo.geneontology.org/amigo/term/GO:0042044
biological_process	flavonoid biosynthetic process	GO:0009813	1	27	5.3	0.177	HORVU2Hr1G002640	1	http://amigo.geneontology.org/amigo/term/GO:0009813
biological_process	flavonoid metabolic process	GO:0009812	1	27	5.3	0.177	HORVU2Hr1G002640	1	http://amigo.geneontology.org/amigo/term/GO:0009812
biological_process	transmembrane receptor protein serine/threonine kinase signaling pathway	GO:0007178	3	81	5.3	0.0208	HORVU2Hr1G002840|HORVU2Hr1G002750|HORVU2Hr1G091360	1	http://amigo.geneontology.org/amigo/term/GO:0007178
biological_process	enzyme linked receptor protein signaling pathway	GO:0007167	3	81	5.3	0.0208	HORVU2Hr1G002840|HORVU2Hr1G002750|HORVU2Hr1G091360	1	http://amigo.geneontology.org/amigo/term/GO:0007167
biological_process	response to oomycetes	GO:0002239	3	81	5.3	0.0208	HORVU2Hr1G002840|HORVU2Hr1G002750|HORVU2Hr1G091360	1	http://amigo.geneontology.org/amigo/term/GO:0002239
biological_process	defense response to oomycetes	GO:0002229	3	81	5.3	0.0208	HORVU2Hr1G002840|HORVU2Hr1G002750|HORVU2Hr1G091360	1	http://amigo.geneontology.org/amigo/term/GO:0002229
biological_process	phosphorylation of RNA polymerase II C-terminal domain	GO:0070816	1	28	5.11	0.183	HORVU4Hr1G088690	1	http://amigo.geneontology.org/amigo/term/GO:0070816
biological_process	protein processing	GO:0016485	2	56	5.11	0.0615	HORVU6Hr1G064230|HORVU4Hr1G088470	1	http://amigo.geneontology.org/amigo/term/GO:0016485
biological_process	positive regulation of hydrolase activity	GO:0051345	1	28	5.11	0.183	HORVU5Hr1G124670	1	http://amigo.geneontology.org/amigo/term/GO:0051345
biological_process	autophagosome assembly	GO:0000045	1	28	5.11	0.183	HORVU5Hr1G094540	1	http://amigo.geneontology.org/amigo/term/GO:0000045
biological_process	cytokinin metabolic process	GO:0009690	1	29	4.93	0.189	HORVU5Hr1G124750	1	http://amigo.geneontology.org/amigo/term/GO:0009690
biological_process	cellular hormone metabolic process	GO:0034754	1	29	4.93	0.189	HORVU5Hr1G124750	1	http://amigo.geneontology.org/amigo/term/GO:0034754
biological_process	nuclear-transcribed mRNA catabolic process, deadenylation-dependent decay	GO:0000288	1	29	4.93	0.189	HORVU4Hr1G088210	1	http://amigo.geneontology.org/amigo/term/GO:0000288
biological_process	one-carbon metabolic process	GO:0006730	1	29	4.93	0.189	HORVU4Hr1G088440	1	http://amigo.geneontology.org/amigo/term/GO:0006730
biological_process	autophagosome organization	GO:1905037	1	29	4.93	0.189	HORVU5Hr1G094540	1	http://amigo.geneontology.org/amigo/term/GO:1905037
biological_process	regulation of translation	GO:0006417	5	150	4.77	0.00465	HORVU4Hr1G088210|HORVU4Hr1G087400|HORVU4Hr1G087430|HORVU4Hr1G087340|HORVU7Hr1G101470	1	http://amigo.geneontology.org/amigo/term/GO:0006417
biological_process	purine ribonucleoside monophosphate metabolic process	GO:0009167	1	30	4.77	0.194	HORVU4Hr1G088440	1	http://amigo.geneontology.org/amigo/term/GO:0009167
biological_process	purine nucleoside monophosphate metabolic process	GO:0009126	1	30	4.77	0.194	HORVU4Hr1G088440	1	http://amigo.geneontology.org/amigo/term/GO:0009126
biological_process	response to misfolded protein	GO:0051788	1	30	4.77	0.194	HORVU2Hr1G091220	1	http://amigo.geneontology.org/amigo/term/GO:0051788
biological_process	cellular response to misfolded protein	GO:0071218	1	30	4.77	0.194	HORVU2Hr1G091220	1	http://amigo.geneontology.org/amigo/term/GO:0071218
biological_process	regulation of cellular amide metabolic process	GO:0034248	5	151	4.74	0.00477	HORVU4Hr1G088210|HORVU4Hr1G087400|HORVU4Hr1G087430|HORVU4Hr1G087340|HORVU7Hr1G101470	1	http://amigo.geneontology.org/amigo/term/GO:0034248
biological_process	nucleobase transport	GO:0015851	1	31	4.62	0.2	HORVU6Hr1G064220	1	http://amigo.geneontology.org/amigo/term/GO:0015851
biological_process	response to carbohydrate	GO:0009743	1	31	4.62	0.2	HORVU2Hr1G002630	1	http://amigo.geneontology.org/amigo/term/GO:0009743
biological_process	response to water deprivation	GO:0009414	1	31	4.62	0.2	HORVU6Hr1G064620	1	http://amigo.geneontology.org/amigo/term/GO:0009414
biological_process	sulfur compound transport	GO:0072348	1	32	4.47	0.205	HORVU6Hr1G064010	1	http://amigo.geneontology.org/amigo/term/GO:0072348
biological_process	response to water	GO:0009415	1	32	4.47	0.205	HORVU6Hr1G064620	1	http://amigo.geneontology.org/amigo/term/GO:0009415
biological_process	response to acid chemical	GO:0001101	1	32	4.47	0.205	HORVU6Hr1G064620	1	http://amigo.geneontology.org/amigo/term/GO:0001101
biological_process	beta-glucan catabolic process	GO:0051275	1	33	4.34	0.211	HORVU4Hr1G087990	1	http://amigo.geneontology.org/amigo/term/GO:0051275
biological_process	cellulose catabolic process	GO:0030245	1	33	4.34	0.211	HORVU4Hr1G087990	1	http://amigo.geneontology.org/amigo/term/GO:0030245
biological_process	mitochondrial respiratory chain complex assembly	GO:0033108	1	34	4.21	0.216	HORVU6Hr1G015900	1	http://amigo.geneontology.org/amigo/term/GO:0033108
biological_process	defense response to bacterium	GO:0042742	3	102	4.21	0.0369	HORVU2Hr1G002840|HORVU2Hr1G002750|HORVU2Hr1G091360	1	http://amigo.geneontology.org/amigo/term/GO:0042742
biological_process	polysaccharide catabolic process	GO:0000272	5	172	4.16	0.00805	HORVU2Hr1G091270|HORVU4Hr1G087990|HORVU2Hr1G002930|HORVU6Hr1G015670|HORVU2Hr1G002880	1	http://amigo.geneontology.org/amigo/term/GO:0000272
biological_process	negative regulation of cellular macromolecule biosynthetic process	GO:2000113	5	173	4.14	0.00824	HORVU4Hr1G088210|HORVU4Hr1G087400|HORVU4Hr1G087430|HORVU4Hr1G087340|HORVU7Hr1G101470	1	http://amigo.geneontology.org/amigo/term/GO:2000113
biological_process	negative regulation of macromolecule biosynthetic process	GO:0010558	5	173	4.14	0.00824	HORVU4Hr1G088210|HORVU4Hr1G087400|HORVU4Hr1G087430|HORVU4Hr1G087340|HORVU7Hr1G101470	1	http://amigo.geneontology.org/amigo/term/GO:0010558
biological_process	ribonucleoside bisphosphate metabolic process	GO:0033875	2	70	4.09	0.0894	HORVU5Hr1G124820|HORVU4Hr1G087110	1	http://amigo.geneontology.org/amigo/term/GO:0033875
biological_process	nucleoside bisphosphate metabolic process	GO:0033865	2	70	4.09	0.0894	HORVU5Hr1G124820|HORVU4Hr1G087110	1	http://amigo.geneontology.org/amigo/term/GO:0033865
biological_process	purine nucleoside bisphosphate metabolic process	GO:0034032	2	70	4.09	0.0894	HORVU5Hr1G124820|HORVU4Hr1G087110	1	http://amigo.geneontology.org/amigo/term/GO:0034032
biological_process	telomere maintenance	GO:0000723	2	70	4.09	0.0894	HORVU7Hr1G103800|HORVU7Hr1G101690	1	http://amigo.geneontology.org/amigo/term/GO:0000723
biological_process	organophosphate catabolic process	GO:0046434	2	70	4.09	0.0894	HORVU4Hr1G087230|HORVU2Hr1G003110	1	http://amigo.geneontology.org/amigo/term/GO:0046434
biological_process	telomere organization	GO:0032200	2	70	4.09	0.0894	HORVU7Hr1G103800|HORVU7Hr1G101690	1	http://amigo.geneontology.org/amigo/term/GO:0032200
biological_process	galacturonan metabolic process	GO:0010393	2	71	4.03	0.0915	HORVU2Hr1G002930|HORVU2Hr1G002880	1	http://amigo.geneontology.org/amigo/term/GO:0010393
biological_process	pectin metabolic process	GO:0045488	2	71	4.03	0.0915	HORVU2Hr1G002930|HORVU2Hr1G002880	1	http://amigo.geneontology.org/amigo/term/GO:0045488
biological_process	GPI anchor biosynthetic process	GO:0006506	1	36	3.98	0.227	HORVU2Hr1G091290	1	http://amigo.geneontology.org/amigo/term/GO:0006506
biological_process	GPI anchor metabolic process	GO:0006505	1	36	3.98	0.227	HORVU2Hr1G091290	1	http://amigo.geneontology.org/amigo/term/GO:0006505
biological_process	histone lysine methylation	GO:0034968	1	36	3.98	0.227	HORVU7Hr1G103420	1	http://amigo.geneontology.org/amigo/term/GO:0034968
biological_process	nucleosome assembly	GO:0006334	2	72	3.98	0.0936	HORVU6Hr1G063900|HORVU5Hr1G094500	1	http://amigo.geneontology.org/amigo/term/GO:0006334
biological_process	regulation of protein-containing complex assembly	GO:0043254	1	36	3.98	0.227	HORVU7Hr1G103510	1	http://amigo.geneontology.org/amigo/term/GO:0043254
biological_process	vacuole organization	GO:0007033	1	36	3.98	0.227	HORVU5Hr1G094540	1	http://amigo.geneontology.org/amigo/term/GO:0007033
biological_process	negative regulation of cellular biosynthetic process	GO:0031327	5	183	3.91	0.0103	HORVU4Hr1G088210|HORVU4Hr1G087400|HORVU4Hr1G087430|HORVU4Hr1G087340|HORVU7Hr1G101470	1	http://amigo.geneontology.org/amigo/term/GO:0031327
biological_process	negative regulation of biosynthetic process	GO:0009890	5	184	3.89	0.0105	HORVU4Hr1G088210|HORVU4Hr1G087400|HORVU4Hr1G087430|HORVU4Hr1G087340|HORVU7Hr1G101470	1	http://amigo.geneontology.org/amigo/term/GO:0009890
biological_process	intra-Golgi vesicle-mediated transport	GO:0006891	1	39	3.67	0.243	HORVU4Hr1G088390	1	http://amigo.geneontology.org/amigo/term/GO:0006891
biological_process	posttranscriptional regulation of gene expression	GO:0010608	5	196	3.65	0.0134	HORVU4Hr1G088210|HORVU4Hr1G087400|HORVU4Hr1G087430|HORVU4Hr1G087340|HORVU7Hr1G101470	1	http://amigo.geneontology.org/amigo/term/GO:0010608
biological_process	negative regulation of gene expression	GO:0010629	5	197	3.63	0.0137	HORVU4Hr1G088210|HORVU4Hr1G087400|HORVU4Hr1G087430|HORVU4Hr1G087340|HORVU7Hr1G101470	1	http://amigo.geneontology.org/amigo/term/GO:0010629
biological_process	response to bacterium	GO:0009617	3	119	3.61	0.0534	HORVU2Hr1G002840|HORVU2Hr1G002750|HORVU2Hr1G091360	1	http://amigo.geneontology.org/amigo/term/GO:0009617
biological_process	biological process involved in interspecies interaction between organisms	GO:0044419	7	278	3.6	0.00394	HORVU2Hr1G002840|HORVU4Hr1G087400|HORVU7Hr1G101470|HORVU4Hr1G087430|HORVU2Hr1G091360|HORVU2Hr1G002750|HORVU4Hr1G087340	1	http://amigo.geneontology.org/amigo/term/GO:0044419
biological_process	hormone biosynthetic process	GO:0042446	1	40	3.58	0.248	HORVU5Hr1G124750	1	http://amigo.geneontology.org/amigo/term/GO:0042446
biological_process	branched-chain amino acid metabolic process	GO:0009081	1	40	3.58	0.248	HORVU4Hr1G087100	1	http://amigo.geneontology.org/amigo/term/GO:0009081
biological_process	protein-DNA complex assembly	GO:0065004	3	120	3.58	0.0545	HORVU6Hr1G063900|HORVU5Hr1G094500|HORVU4Hr1G088690	1	http://amigo.geneontology.org/amigo/term/GO:0065004
biological_process	phenylpropanoid metabolic process	GO:0009698	3	121	3.55	0.0556	HORVU5Hr1G124820|HORVU4Hr1G087630|HORVU4Hr1G087110	1	http://amigo.geneontology.org/amigo/term/GO:0009698
biological_process	ribonucleoside monophosphate biosynthetic process	GO:0009156	1	41	3.49	0.254	HORVU4Hr1G088440	1	http://amigo.geneontology.org/amigo/term/GO:0009156
biological_process	RNA destabilization	GO:0050779	1	41	3.49	0.254	HORVU4Hr1G088210	1	http://amigo.geneontology.org/amigo/term/GO:0050779
biological_process	regulation of transport	GO:0051049	1	41	3.49	0.254	HORVU7Hr1G103510	1	http://amigo.geneontology.org/amigo/term/GO:0051049
biological_process	endoplasmic reticulum to Golgi vesicle-mediated transport	GO:0006888	2	82	3.49	0.116	HORVU5Hr1G094410|HORVU4Hr1G088390	1	http://amigo.geneontology.org/amigo/term/GO:0006888
biological_process	xylan metabolic process	GO:0045491	1	41	3.49	0.254	HORVU2Hr1G091270	1	http://amigo.geneontology.org/amigo/term/GO:0045491
biological_process	mRNA destabilization	GO:0061157	1	41	3.49	0.254	HORVU4Hr1G088210	1	http://amigo.geneontology.org/amigo/term/GO:0061157
biological_process	nucleosome organization	GO:0034728	2	83	3.45	0.118	HORVU6Hr1G063900|HORVU5Hr1G094500	1	http://amigo.geneontology.org/amigo/term/GO:0034728
biological_process	protein maturation	GO:0051604	2	83	3.45	0.118	HORVU6Hr1G064230|HORVU4Hr1G088470	1	http://amigo.geneontology.org/amigo/term/GO:0051604
biological_process	positive regulation of mRNA catabolic process	GO:0061014	1	42	3.41	0.259	HORVU4Hr1G088210	1	http://amigo.geneontology.org/amigo/term/GO:0061014
biological_process	transcription initiation from RNA polymerase II promoter	GO:0006367	1	42	3.41	0.259	HORVU4Hr1G088690	1	http://amigo.geneontology.org/amigo/term/GO:0006367
biological_process	DNA-templated transcription, initiation	GO:0006352	2	84	3.41	0.12	HORVU5Hr1G125110|HORVU4Hr1G088690	1	http://amigo.geneontology.org/amigo/term/GO:0006352
biological_process	secondary metabolic process	GO:0019748	4	169	3.39	0.0329	HORVU2Hr1G002640|HORVU5Hr1G124820|HORVU4Hr1G087630|HORVU4Hr1G087110	1	http://amigo.geneontology.org/amigo/term/GO:0019748
biological_process	lipid transport	GO:0006869	3	127	3.38	0.0622	HORVU4Hr1G087670|HORVU7Hr1G101310|HORVU4Hr1G088060	1	http://amigo.geneontology.org/amigo/term/GO:0006869
biological_process	histone methylation	GO:0016571	1	43	3.33	0.264	HORVU7Hr1G103420	1	http://amigo.geneontology.org/amigo/term/GO:0016571
biological_process	regulation of localization	GO:0032879	1	43	3.33	0.264	HORVU7Hr1G103510	1	http://amigo.geneontology.org/amigo/term/GO:0032879
biological_process	ribonucleoside monophosphate metabolic process	GO:0009161	1	44	3.25	0.269	HORVU4Hr1G088440	1	http://amigo.geneontology.org/amigo/term/GO:0009161
biological_process	macroautophagy	GO:0016236	1	44	3.25	0.269	HORVU5Hr1G094540	1	http://amigo.geneontology.org/amigo/term/GO:0016236
biological_process	DNA duplex unwinding	GO:0032508	2	88	3.25	0.129	HORVU7Hr1G103800|HORVU7Hr1G101690	1	http://amigo.geneontology.org/amigo/term/GO:0032508
biological_process	protein-DNA complex subunit organization	GO:0071824	3	132	3.25	0.0681	HORVU6Hr1G063900|HORVU5Hr1G094500|HORVU4Hr1G088690	1	http://amigo.geneontology.org/amigo/term/GO:0071824
biological_process	DNA geometric change	GO:0032392	2	88	3.25	0.129	HORVU7Hr1G103800|HORVU7Hr1G101690	1	http://amigo.geneontology.org/amigo/term/GO:0032392
biological_process	negative regulation of protein metabolic process	GO:0051248	5	223	3.21	0.0219	HORVU4Hr1G088210|HORVU4Hr1G087400|HORVU4Hr1G087430|HORVU4Hr1G087340|HORVU7Hr1G101470	1	http://amigo.geneontology.org/amigo/term/GO:0051248
biological_process	negative regulation of cellular protein metabolic process	GO:0032269	5	223	3.21	0.0219	HORVU4Hr1G088210|HORVU4Hr1G087400|HORVU4Hr1G087430|HORVU4Hr1G087340|HORVU7Hr1G101470	1	http://amigo.geneontology.org/amigo/term/GO:0032269
biological_process	maturation of SSU-rRNA from tricistronic rRNA transcript (SSU-rRNA, 5.8S rRNA, LSU-rRNA)	GO:0000462	1	45	3.18	0.274	HORVU6Hr1G016260	1	http://amigo.geneontology.org/amigo/term/GO:0000462
biological_process	xenobiotic export	GO:0046618	1	45	3.18	0.274	HORVU5Hr1G124880	1	http://amigo.geneontology.org/amigo/term/GO:0046618
biological_process	xenobiotic detoxification by transmembrane export across the plasma membrane	GO:1990961	1	45	3.18	0.274	HORVU5Hr1G124880	1	http://amigo.geneontology.org/amigo/term/GO:1990961
biological_process	regulation of mRNA stability	GO:0043488	1	46	3.11	0.279	HORVU4Hr1G088210	1	http://amigo.geneontology.org/amigo/term/GO:0043488
biological_process	lipid localization	GO:0010876	3	141	3.04	0.0791	HORVU4Hr1G087670|HORVU7Hr1G101310|HORVU4Hr1G088060	1	http://amigo.geneontology.org/amigo/term/GO:0010876
biological_process	regulation of mRNA catabolic process	GO:0061013	1	47	3.04	0.284	HORVU4Hr1G088210	1	http://amigo.geneontology.org/amigo/term/GO:0061013
biological_process	positive regulation of mRNA metabolic process	GO:1903313	1	47	3.04	0.284	HORVU4Hr1G088210	1	http://amigo.geneontology.org/amigo/term/GO:1903313
biological_process	cellular response to heat	GO:0034605	1	47	3.04	0.284	HORVU6Hr1G063810	1	http://amigo.geneontology.org/amigo/term/GO:0034605
biological_process	response to cold	GO:0009409	1	47	3.04	0.284	HORVU6Hr1G064620	1	http://amigo.geneontology.org/amigo/term/GO:0009409
biological_process	lignin metabolic process	GO:0009808	1	48	2.98	0.289	HORVU4Hr1G08763	1	http://amigo.geneontology.org/amigo/term/GO:0009808
biological_process	regulation of RNA stability	GO:0043487	1	48	2.98	0.289	HORVU4Hr1G088210	1	http://amigo.geneontology.org/amigo/term/GO:0043487
biological_process	tRNA methylation	GO:0030488	1	49	2.92	0.294	HORVU5Hr1G094580	1	http://amigo.geneontology.org/amigo/term/GO:0030488
biological_process	cellular response to oxidative stress	GO:0034599	1	49	2.92	0.294	HORVU4Hr1G088610	1	http://amigo.geneontology.org/amigo/term/GO:0034599
biological_process	fatty acid beta-oxidation	GO:0006635	1	49	2.92	0.294	HORVU4Hr1G087680	1	http://amigo.geneontology.org/amigo/term/GO:0006635
biological_process	protein quality control for misfolded or incompletely synthesized proteins	GO:0006515	1	50	2.86	0.299	HORVU2Hr1G091220	1	http://amigo.geneontology.org/amigo/term/GO:0006515
biological_process	nucleoside metabolic process	GO:0009116	1	50	2.86	0.299	HORVU5Hr1G094580	1	http://amigo.geneontology.org/amigo/term/GO:0009116
biological_process	mRNA transport	GO:0051028	1	50	2.86	0.299	HORVU7Hr1G101390	1	http://amigo.geneontology.org/amigo/term/GO:0051028
biological_process	fatty acid oxidation	GO:0019395	1	50	2.86	0.299	HORVU4Hr1G087680	1	http://amigo.geneontology.org/amigo/term/GO:0019395
biological_process	chromatin remodeling	GO:0006338	2	101	2.83	0.16	HORVU6Hr1G063900|HORVU5Hr1G094500	1	http://amigo.geneontology.org/amigo/term/GO:0006338
biological_process	fatty acid catabolic process	GO:0009062	1	52	2.75	0.309	HORVU4Hr1G087680	1	http://amigo.geneontology.org/amigo/term/GO:0009062
biological_process	chromatin assembly or disassembly	GO:0006333	2	104	2.75	0.168	HORVU6Hr1G063900|HORVU5Hr1G094500	1	http://amigo.geneontology.org/amigo/term/GO:0006333
biological_process	chromatin assembly	GO:0031497	2	104	2.75	0.168	HORVU6Hr1G063900|HORVU5Hr1G094500	1	http://amigo.geneontology.org/amigo/term/GO:0031497
biological_process	DNA conformation change	GO:0071103	4	208	2.75	0.0609	HORVU7Hr1G103800|HORVU6Hr1G063900|HORVU5Hr1G094500|HORVU7Hr1G101690	1	http://amigo.geneontology.org/amigo/term/GO:0071103
biological_process	nucleoside diphosphate metabolic process	GO:0009132	2	106	2.7	0.173	HORVU4Hr1G087230|HORVU2Hr1G003110	1	http://amigo.geneontology.org/amigo/term/GO:0009132
biological_process	nucleoside monophosphate biosynthetic process	GO:0009124	1	53	2.7	0.314	HORVU4Hr1G088440	1	http://amigo.geneontology.org/amigo/term/GO:0009124
biological_process	cell recognition	GO:0008037	2	106	2.7	0.173	HORVU2Hr1G002830|HORVU4Hr1G088090	1	http://amigo.geneontology.org/amigo/term/GO:0008037
biological_process	glycosyl compound metabolic process	GO:1901657	1	53	2.7	0.314	HORVU5Hr1G094580	1	http://amigo.geneontology.org/amigo/term/GO:1901657
biological_process	recognition of pollen	GO:0048544	2	106	2.7	0.173	HORVU2Hr1G002830|HORVU4Hr1G088090	1	http://amigo.geneontology.org/amigo/term/GO:0048544
biological_process	response to wounding	GO:0009611	1	54	2.65	0.318	HORVU4Hr1G08752	1	http://amigo.geneontology.org/amigo/term/GO:0009611
biological_process	regulation of growth	GO:0040008	1	54	2.65	0.318	HORVU5Hr1G124940	1	http://amigo.geneontology.org/amigo/term/GO:0040008
biological_process	export across plasma membrane	GO:0140115	1	54	2.65	0.318	HORVU5Hr1G124880	1	http://amigo.geneontology.org/amigo/term/GO:0140115
biological_process	cellular response to chemical stress	GO:0062197	1	54	2.65	0.318	HORVU4Hr1G088610	1	http://amigo.geneontology.org/amigo/term/GO:0062197
biological_process	tRNA modification	GO:0006400	2	110	2.6	0.183	HORVU5Hr1G094580|HORVU2Hr1G091370	1	http://amigo.geneontology.org/amigo/term/GO:0006400
biological_process	maturation of SSU-rRNA	GO:0030490	1	55	2.6	0.323	HORVU6Hr1G016260	1	http://amigo.geneontology.org/amigo/term/GO:0030490
biological_process	DNA packaging	GO:0006323	2	110	2.6	0.183	HORVU6Hr1G063900|HORVU5Hr1G094500	1	http://amigo.geneontology.org/amigo/term/GO:0006323
biological_process	regulation of defense response	GO:0031347	1	55	2.6	0.323	HORVU4Hr1G087520	1	http://amigo.geneontology.org/amigo/term/GO:0031347
biological_process	peptidyl-lysine methylation	GO:0018022	1	55	2.6	0.323	HORVU7Hr1G103420	1	http://amigo.geneontology.org/amigo/term/GO:0018022
biological_process	response to nitrogen compound	GO:1901698	2	111	2.58	0.185	HORVU4Hr1G088020|HORVU2Hr1G091220	1	http://amigo.geneontology.org/amigo/term/GO:1901698
biological_process	chaperone cofactor-dependent protein refolding	GO:0051085	1	56	2.56	0.328	HORVU6Hr1G016080	1	http://amigo.geneontology.org/amigo/term/GO:0051085
biological_process	'de novo' posttranslational protein folding	GO:0051084	1	56	2.56	0.328	HORVU6Hr1G016080	1	http://amigo.geneontology.org/amigo/term/GO:0051084
biological_process	response to inorganic substance	GO:0010035	2	112	2.56	0.188	HORVU4Hr1G088020|ORVU6Hr1G064620	1	http://amigo.geneontology.org/amigo/term/GO:0010035
biological_process	cellular polysaccharide catabolic process	GO:0044247	1	56	2.56	0.328	HORVU4Hr1G087990	1	http://amigo.geneontology.org/amigo/term/GO:0044247
biological_process	glycolipid biosynthetic process	GO:0009247	1	56	2.56	0.328	HORVU2Hr1G091290	1	http://amigo.geneontology.org/amigo/term/GO:0009247
biological_process	carbohydrate catabolic process	GO:0016052	5	281	2.55	0.0499	HORVU2Hr1G091270|HORVU4Hr1G087990|HORVU2Hr1G002930|HORVU6Hr1G015670|HORVU2Hr1G002880	1	http://amigo.geneontology.org/amigo/term/GO:0016052
biological_process	pollen-pistil interaction	GO:0009875	2	115	2.49	0.195	HORVU2Hr1G002830|HORVU4Hr1G088090	1	http://amigo.geneontology.org/amigo/term/GO:0009875
biological_process	monocarboxylic acid catabolic process	GO:0072329	1	58	2.47	0.337	HORVU4Hr1G087680	1	http://amigo.geneontology.org/amigo/term/GO:0072329
biological_process	inorganic anion transport	GO:0015698	2	117	2.45	0.2	HORVU4Hr1G088020|HORVU4Hr1G087350	1	http://amigo.geneontology.org/amigo/term/GO:0015698
biological_process	autophagy	GO:0006914	1	59	2.43	0.342	HORVU5Hr1G094540	1	http://amigo.geneontology.org/amigo/term/GO:0006914
biological_process	process utilizing autophagic mechanism	GO:0061919	1	59	2.43	0.342	HORVU5Hr1G094540	1	http://amigo.geneontology.org/amigo/term/GO:0061919
biological_process	nucleobase-containing compound catabolic process	GO:0034655	3	178	2.41	0.132	HORVU4Hr1G088210|HORVU4Hr1G087230|HORVU2Hr1G003110	1	http://amigo.geneontology.org/amigo/term/GO:0034655
biological_process	Golgi vesicle transport	GO:0048193	3	178	2.41	0.132	HORVU2Hr1G091230|HORVU5Hr1G094410|HORVU4Hr1G088390	1	http://amigo.geneontology.org/amigo/term/GO:0048193
biological_process	glycerophospholipid biosynthetic process	GO:0046474	2	120	2.39	0.208	HORVU2Hr1G091290|HORVU4Hr1G088470	1	http://amigo.geneontology.org/amigo/term/GO:0046474
biological_process	'de novo' protein folding	GO:0006458	1	61	2.35	0.351	HORVU6Hr1G016080	1	http://amigo.geneontology.org/amigo/term/GO:0006458
biological_process	xenobiotic transport	GO:0042908	1	61	2.35	0.351	HORVU5Hr1G124880	1	http://amigo.geneontology.org/amigo/term/GO:0042908
biological_process	liposaccharide metabolic process	GO:1903509	1	61	2.35	0.351	HORVU2Hr1G091290	1	http://amigo.geneontology.org/amigo/term/GO:1903509
biological_process	glycolipid metabolic process	GO:0006664	1	61	2.35	0.351	HORVU2Hr1G091290	1	http://amigo.geneontology.org/amigo/term/GO:0006664
biological_process	multi-multicellular organism process	GO:0044706	2	123	2.33	0.215	HORVU2Hr1G002830|HORVU4Hr1G088090	1	http://amigo.geneontology.org/amigo/term/GO:0044706
biological_process	pollination	GO:0009856	2	123	2.33	0.215	HORVU2Hr1G002830|HORVU4Hr1G088090	1	http://amigo.geneontology.org/amigo/term/GO:0009856
biological_process	nucleotide-excision repair	GO:0006289	1	63	2.27	0.36	HORVU4Hr1G088690	1	http://amigo.geneontology.org/amigo/term/GO:0006289
biological_process	protein ubiquitination	GO:0016567	11	699	2.25	0.0181	HORVU7Hr1G103330|HORVU4Hr1G088660|HORVU4Hr1G088650|HORVU6Hr1G016200|HORVU6Hr1G016120|HORVU2Hr1G091220|HORVU7Hr1G103380|HORVU6Hr1G064110|HORVU4Hr1G087120|HORVU6Hr1G064450|HORVU6Hr1G064130	1	http://amigo.geneontology.org/amigo/term/GO:0016567
biological_process	establishment of organelle localization	GO:0051656	1	64	2.24	0.364	HORVU5Hr1G124770	1	http://amigo.geneontology.org/amigo/term/GO:0051656
biological_process	nuclear-transcribed mRNA catabolic process	GO:0000956	1	64	2.24	0.364	HORVU4Hr1G088210	1	http://amigo.geneontology.org/amigo/term/GO:0000956
biological_process	meiosis I cell cycle process	GO:0061982	1	64	2.24	0.364	HORVU4Hr1G087200	1	http://amigo.geneontology.org/amigo/term/GO:0061982
biological_process	regulation of cellular component organization	GO:0051128	2	130	2.2	0.233	HORVU7Hr1G103510|HORVU6Hr1G063900	1	http://amigo.geneontology.org/amigo/term/GO:0051128
biological_process	hormone metabolic process	GO:0042445	1	65	2.2	0.369	HORVU5Hr1G124750	1	http://amigo.geneontology.org/amigo/term/GO:0042445
biological_process	defense response	GO:0006952	8	523	2.19	0.0329	HORVU2Hr1G002840|HORVU6Hr1G063850|HORVU2Hr1G002750|HORVU2Hr1G091360|HORVU4Hr1G087400|HORVU4Hr1G087430|HORVU4Hr1G087340|HORVU7Hr1G101470	1	http://amigo.geneontology.org/amigo/term/GO:0006952
biological_process	cellular response to ethylene stimulus	GO:0071369	1	66	2.17	0.373	HORVU6Hr1G064370	1	http://amigo.geneontology.org/amigo/term/GO:0071369
biological_process	modification-dependent protein catabolic process	GO:0019941	8	528	2.17	0.0345	HORVU7Hr1G103330|HORVU4Hr1G088660|HORVU6Hr1G016200|HORVU6Hr1G016120|HORVU2Hr1G091220|HORVU7Hr1G103380|HORVU4Hr1G087120|HORVU6Hr1G064450	1	http://amigo.geneontology.org/amigo/term/GO:0019941
biological_process	lipid oxidation	GO:0034440	1	66	2.17	0.373	HORVU4Hr1G087680	1	http://amigo.geneontology.org/amigo/term/GO:0034440
biological_process	ethylene-activated signaling pathway	GO:0009873	1	66	2.17	0.373	HORVU6Hr1G064370	1	http://amigo.geneontology.org/amigo/term/GO:0009873
biological_process	reproductive process	GO:0022414	6	397	2.16	0.0631	HORVU2Hr1G002830|HORVU4Hr1G087070|HORVU4Hr1G088090|HORVU4Hr1G087200|HORVU4Hr1G088080|HORVU4Hr1G088140	1	http://amigo.geneontology.org/amigo/term/GO:0022414
biological_process	response to temperature stimulus	GO:0009266	2	133	2.15	0.241	HORVU6Hr1G064620|HORVU6Hr1G063810	1	http://amigo.geneontology.org/amigo/term/GO:0009266
biological_process	protein modification by small protein conjugation	GO:0032446	11	733	2.15	0.0208	HORVU7Hr1G103330|HORVU4Hr1G088660|HORVU4Hr1G088650|HORVU6Hr1G016200|HORVU6Hr1G016120|HORVU2Hr1G091220|HORVU7Hr1G103380|HORVU6Hr1G064110|HORVU4Hr1G087120|HORVU6Hr1G064450|HORVU6Hr1G064130	1	http://amigo.geneontology.org/amigo/term/GO:0032446
biological_process	reproduction	GO:0000003	6	400	2.15	0.0649	HORVU2Hr1G002830|HORVU4Hr1G087070|HORVU4Hr1G088090|HORVU4Hr1G087200|HORVU4Hr1G088080|HORVU4Hr1G088140	1	http://amigo.geneontology.org/amigo/term/GO:0000003
biological_process	establishment of RNA localization	GO:0051236	1	67	2.14	0.377	HORVU7Hr1G101390	1	http://amigo.geneontology.org/amigo/term/GO:0051236
biological_process	peptide transport	GO:0015833	1	67	2.14	0.377	HORVU4Hr1G088020	1	http://amigo.geneontology.org/amigo/term/GO:0015833
biological_process	nuclear export	GO:0051168	1	67	2.14	0.377	HORVU5Hr1G124770	1	http://amigo.geneontology.org/amigo/term/GO:0051168
biological_process	RNA transport	GO:0050658	1	67	2.14	0.377	HORVU7Hr1G101390	1	http://amigo.geneontology.org/amigo/term/GO:0050658
biological_process	nucleic acid transport	GO:0050657	1	67	2.14	0.377	HORVU7Hr1G101390	1	http://amigo.geneontology.org/amigo/term/GO:0050657
biological_process	oligopeptide transport	GO:0006857	1	67	2.14	0.377	HORVU4Hr1G088020	1	http://amigo.geneontology.org/amigo/term/GO:0006857
biological_process	heterocycle catabolic process	GO:0046700	3	201	2.14	0.169	HORVU4Hr1G088210|HORVU4Hr1G087230|HORVU2Hr1G003110	1	http://amigo.geneontology.org/amigo/term/GO:0046700
biological_process	purine-containing compound metabolic process	GO:0072521	4	269	2.13	0.123	HORVU4Hr1G088440|HORVU5Hr1G094580|HORVU5Hr1G124820|HORVU4Hr1G087110	1	http://amigo.geneontology.org/amigo/term/GO:0072521
biological_process	defense response to other organism	GO:0098542	3	202	2.13	0.171	HORVU2Hr1G002840|HORVU2Hr1G002750|HORVU2Hr1G091360	1	http://amigo.geneontology.org/amigo/term/GO:0098542
biological_process	modification-dependent macromolecule catabolic process	GO:0043632	8	539	2.12	0.0596	HORVU7Hr1G103330|HORVU4Hr1G088660|HORVU6Hr1G016200|HORVU6Hr1G016120|HORVU2Hr1G091220|HORVU7Hr1G103380|HORVU4Hr1G087120|HORVU6Hr1G064450	1	http://amigo.geneontology.org/amigo/term/GO:0043632
biological_process	cellular nitrogen compound catabolic process	GO:0044270	3	203	2.11	0.173	HORVU4Hr1G088210|HORVU4Hr1G087230|HORVU2Hr1G003110	1	http://amigo.geneontology.org/amigo/term/GO:0044270
biological_process	cellular response to topologically incorrect protein	GO:0035967	1	68	2.1	0.382	HORVU2Hr1G091220	1	http://amigo.geneontology.org/amigo/term/GO:0035967
biological_process	response to topologically incorrect protein	GO:0035966	1	68	2.1	0.382	HORVU2Hr1G091220	1	http://amigo.geneontology.org/amigo/term/GO:0035966
biological_process	macromolecule catabolic process	GO:0009057	14	953	2.1	0.00914	HORVU4Hr1G088660|HORVU2Hr1G091270|HORVU4Hr1G088210|HORVU4Hr1G087990|HORVU6Hr1G016200|HORVU2Hr1G002930|HORVU6Hr1G016120|HORVU6Hr1G015670|HORVU2Hr1G002880|HORVU4Hr1G087120|HORVU7Hr1G103330|HORVU2Hr1G091220|HORVU7Hr1G103380|HORVU6Hr1G064450	1	http://amigo.geneontology.org/amigo/term/GO:0009057
biological_process	export from cell	GO:0140352	2	137	2.09	0.251	HORVU5Hr1G124880|HORVU7Hr1G103510	1	http://amigo.geneontology.org/amigo/term/GO:0140352
biological_process	negative regulation of nitrogen compound metabolic process	GO:0051172	5	343	2.09	0.0961	HORVU4Hr1G088210|HORVU4Hr1G087400|HORVU4Hr1G087430|HORVU4Hr1G087340|HORVU7Hr1G101470	1	http://amigo.geneontology.org/amigo/term/GO:0051172
biological_process	photosynthetic electron transport chain	GO:0009767	1	69	2.07	0.386	HORVU6Hr1G015640	1	http://amigo.geneontology.org/amigo/term/GO:0009767
biological_process	glucan catabolic process	GO:0009251	1	69	2.07	0.386	HORVU4Hr1G087990	1	http://amigo.geneontology.org/amigo/term/GO:0009251
biological_process	cellular developmental process	GO:0048869	2	139	2.06	0.256	HORVU4Hr1G087200|HORVU4Hr1G088280	1	http://amigo.geneontology.org/amigo/term/GO:0048869
biological_process	nucleoside phosphate metabolic process	GO:0006753	5	352	2.03	0.104	HORVU4Hr1G088440|HORVU5Hr1G124820|HORVU4Hr1G087110|HORVU4Hr1G087230|HORVU2Hr1G003110	1	http://amigo.geneontology.org/amigo/term/GO:0006753
biological_process	negative regulation of cellular metabolic process	GO:0031324	5	353	2.03	0.105	HORVU4Hr1G088210|HORVU4Hr1G087400|HORVU4Hr1G087430|HORVU4Hr1G087340|HORVU7Hr1G101470	1	http://amigo.geneontology.org/amigo/term/GO:0031324
biological_process	tRNA processing	GO:0008033	2	143	2	0.267	HORVU5Hr1G094580|HORVU2Hr1G091370	1	http://amigo.geneontology.org/amigo/term/GO:0008033
biological_process	nucleoside monophosphate metabolic process	GO:0009123	1	72	1.99	0.399	HORVU4Hr1G088440	1	http://amigo.geneontology.org/amigo/term/GO:0009123
biological_process	cell surface receptor signaling pathway	GO:0007166	3	218	1.97	0.199	HORVU2Hr1G002840|HORVU2Hr1G002750|HORVU2Hr1G091360	1	http://amigo.geneontology.org/amigo/term/GO:0007166
biological_process	response to other organism	GO:0051707	3	221	1.94	0.204	HORVU2Hr1G002840|HORVU2Hr1G002750|HORVU2Hr1G091360	1	http://amigo.geneontology.org/amigo/term/GO:0051707
biological_process	response to external biotic stimulus	GO:0043207	3	221	1.94	0.204	HORVU2Hr1G002840|HORVU2Hr1G002750|HORVU2Hr1G091360	1	http://amigo.geneontology.org/amigo/term/GO:0043207
biological_process	glycerolipid biosynthetic process	GO:0045017	2	148	1.93	0.279	HORVU2Hr1G091290|HORVU4Hr1G088470	1	http://amigo.geneontology.org/amigo/term/GO:0045017
biological_process	chaperone-mediated protein folding	GO:0061077	1	74	1.93	0.407	HORVU6Hr1G016080	1	http://amigo.geneontology.org/amigo/term/GO:0061077
biological_process	response to ethylene	GO:0009723	1	75	1.91	0.411	HORVU6Hr1G064370	1	http://amigo.geneontology.org/amigo/term/GO:0009723
biological_process	cellular carbohydrate catabolic process	GO:0044275	1	75	1.91	0.411	HORVU4Hr1G087990	1	http://amigo.geneontology.org/amigo/term/GO:0044275
biological_process	polysaccharide metabolic process	GO:0005976	5	376	1.9	0.197	HORVU2Hr1G091270|HORVU4Hr1G087990|HORVU2Hr1G002930|HORVU6Hr1G015670|HORVU2Hr1G002880	1	http://amigo.geneontology.org/amigo/term/GO:0005976
biological_process	nucleobase-containing small molecule metabolic process	GO:0055086	6	452	1.9	0.141	HORVU4Hr1G088440|HORVU5Hr1G094580|HORVU5Hr1G124820|HORVU4Hr1G087110|HORVU4Hr1G087230|HORVU2Hr1G003110	1	http://amigo.geneontology.org/amigo/term/GO:0055086
biological_process	phospholipid biosynthetic process	GO:0008654	2	151	1.9	0.287	HORVU2Hr1G091290|HORVU4Hr1G088470	1	http://amigo.geneontology.org/amigo/term/GO:0008654
biological_process	protein lipidation	GO:0006497	1	76	1.88	0.415	HORVU2Hr1G091290	1	http://amigo.geneontology.org/amigo/term/GO:0006497
biological_process	lipoprotein biosynthetic process	GO:0042158	1	76	1.88	0.415	HORVU2Hr1G091290	1	http://amigo.geneontology.org/amigo/term/GO:0042158
biological_process	phosphatidylinositol biosynthetic process	GO:0006661	1	76	1.88	0.415	HORVU2Hr1G091290	1	http://amigo.geneontology.org/amigo/term/GO:0006661
biological_process	chromosome organization	GO:0051276	5	382	1.87	0.2	HORVU7Hr1G103800|HORVU4Hr1G087200|HORVU6Hr1G063900|HORVU5Hr1G094500|HORVU7Hr1G101690	1	http://amigo.geneontology.org/amigo/term/GO:0051276
biological_process	aromatic compound catabolic process	GO:0019439	3	231	1.86	0.222	HORVU4Hr1G088210|HORVU4Hr1G087230|HORVU2Hr1G003110	1	http://amigo.geneontology.org/amigo/term/GO:0019439
biological_process	RNA localization	GO:0006403	1	77	1.86	0.419	HORVU7Hr1G101390	1	http://amigo.geneontology.org/amigo/term/GO:0006403
biological_process	amide transport	GO:0042886	1	77	1.86	0.419	HORVU4Hr1G088020	1	http://amigo.geneontology.org/amigo/term/GO:0042886
biological_process	glycerophospholipid metabolic process	GO:0006650	2	155	1.85	0.297	HORVU2Hr1G091290|HORVU4Hr1G088470	1	http://amigo.geneontology.org/amigo/term/GO:0006650
biological_process	protein modification by small protein conjugation or removal	GO:0070647	11	853	1.85	0.0562	HORVU7Hr1G103330|HORVU4Hr1G088660|HORVU4Hr1G088650|HORVU6Hr1G016200|HORVU6Hr1G016120|HORVU2Hr1G091220|HORVU7Hr1G103380|HORVU6Hr1G064110|HORVU4Hr1G087120|HORVU6Hr1G064450|HORVU6Hr1G064130	1	http://amigo.geneontology.org/amigo/term/GO:0070647
biological_process	electron transport chain	GO:0022900	5	388	1.84	0.203	HORVU4Hr1G087680|HORVU6Hr1G015640|HORVU6Hr1G064590|HORVU7Hr1G104180|HORVU6Hr1G015900	1	http://amigo.geneontology.org/amigo/term/GO:0022900
biological_process	lipoprotein metabolic process	GO:0042157	1	78	1.83	0.423	HORVU2Hr1G091290	1	http://amigo.geneontology.org/amigo/term/GO:0042157
biological_process	positive regulation of catalytic activity	GO:0043085	1	79	1.81	0.427	HORVU5Hr1G124670	1	http://amigo.geneontology.org/amigo/term/GO:0043085
biological_process	cellular macromolecule catabolic process	GO:0044265	10	798	1.79	0.0796	HORVU7Hr1G103330|HORVU4Hr1G088660|HORVU2Hr1G091270|HORVU4Hr1G088210|HORVU6Hr1G016200|HORVU6Hr1G016120|HORVU2Hr1G091220|HORVU7Hr1G103380|HORVU4Hr1G087120|HORVU6Hr1G064450	1	http://amigo.geneontology.org/amigo/term/GO:0044265
biological_process	mRNA catabolic process	GO:0006402	1	80	1.79	0.431	HORVU4Hr1G088210	1	http://amigo.geneontology.org/amigo/term/GO:0006402
biological_process	organic cyclic compound catabolic process	GO:1901361	3	240	1.79	0.239	HORVU4Hr1G088210|HORVU4Hr1G087230|HORVU2Hr1G003110	1	http://amigo.geneontology.org/amigo/term/GO:1901361
biological_process	proteolysis involved in cellular protein catabolic process	GO:0051603	8	645	1.77	0.0967	HORVU7Hr1G103330|HORVU4Hr1G088660|HORVU6Hr1G016200|HORVU6Hr1G016120|HORVU2Hr1G091220|HORVU7Hr1G103380|HORVU4Hr1G087120|HORVU6Hr1G064450	1	http://amigo.geneontology.org/amigo/term/GO:0051603
biological_process	cellular protein catabolic process	GO:0044257	8	647	1.77	0.144	HORVU7Hr1G103330|HORVU4Hr1G088660|HORVU6Hr1G016200|HORVU6Hr1G016120|HORVU2Hr1G091220|HORVU7Hr1G103380|HORVU4Hr1G087120|HORVU6Hr1G064450	1	http://amigo.geneontology.org/amigo/term/GO:0044257
biological_process	protein methylation	GO:0006479	1	81	1.77	0.435	HORVU7Hr1G103420	1	http://amigo.geneontology.org/amigo/term/GO:0006479
biological_process	protein alkylation	GO:0008213	1	81	1.77	0.435	HORVU7Hr1G103420	1	http://amigo.geneontology.org/amigo/term/GO:0008213
biological_process	macromolecule localization	GO:0033036	11	893	1.76	0.0647	HORVU2Hr1G091290|HORVU7Hr1G101390|HORVU4Hr1G087670|HORVU5Hr1G124770|HORVU7Hr1G103510|HORVU6Hr1G016100|HORVU2Hr1G091230|HORVU5Hr1G094410|HORVU7Hr1G101310|HORVU4Hr1G088060|HORVU4Hr1G088390	1	http://amigo.geneontology.org/amigo/term/GO:0033036
biological_process	purine ribonucleotide metabolic process	GO:0009150	3	245	1.75	0.248	HORVU4Hr1G088440|HORVU5Hr1G124820|HORVU4Hr1G087110	1	http://amigo.geneontology.org/amigo/term/GO:0009150
biological_process	protein catabolic process	GO:0030163	8	654	1.75	0.146	HORVU7Hr1G103330|HORVU4Hr1G088660|HORVU6Hr1G016200|HORVU6Hr1G016120|HORVU2Hr1G091220|HORVU7Hr1G103380|HORVU4Hr1G087120|HORVU6Hr1G064450	1	http://amigo.geneontology.org/amigo/term/GO:0030163
biological_process	ERAD pathway	GO:0036503	1	82	1.75	0.439	HORVU2Hr1G091220	1	http://amigo.geneontology.org/amigo/term/GO:0036503
biological_process	potassium ion transport	GO:0006813	1	82	1.75	0.439	HORVU4Hr1G087960	1	http://amigo.geneontology.org/amigo/term/GO:0006813
biological_process	cellulose metabolic process	GO:0030243	1	82	1.75	0.439	HORVU4Hr1G087990	1	http://amigo.geneontology.org/amigo/term/GO:0030243
biological_process	response to biotic stimulus	GO:0009607	3	247	1.74	0.251	HORVU2Hr1G002840|HORVU2Hr1G002750|HORVU2Hr1G091360	1	http://amigo.geneontology.org/amigo/term/GO:0009607
biological_process	purine nucleotide metabolic process	GO:0006163	3	249	1.72	0.255	HORVU4Hr1G088440|HORVU5Hr1G124820|HORVU4Hr1G087110	1	http://amigo.geneontology.org/amigo/term/GO:0006163
biological_process	secretion by cell	GO:0032940	1	83	1.72	0.443	HORVU7Hr1G103510	1	http://amigo.geneontology.org/amigo/term/GO:0032940
biological_process	transcription by RNA polymerase II	GO:0006366	1	84	1.7	0.447	HORVU4Hr1G088690	1	http://amigo.geneontology.org/amigo/term/GO:0006366
biological_process	organic substance catabolic process	GO:1901575	17	1443	1.69	0.035	HORVU4Hr1G087680|HORVU4Hr1G088660|HORVU2Hr1G091270|HORVU4Hr1G088210|HORVU4Hr1G087990|HORVU6Hr1G016200|HORVU2Hr1G002930|HORVU6Hr1G016120|HORVU6Hr1G015670|HORVU4Hr1G087230|HORVU2Hr1G002880|HORVU4Hr1G087120|HORVU2Hr1G003110|HORVU7Hr1G103330|HORVU2Hr1G091220|HORVU7Hr1G103380|HORVU6Hr1G064450	1	http://amigo.geneontology.org/amigo/term/GO:1901575
biological_process	positive regulation of molecular function	GO:0044093	1	85	1.68	0.451	HORVU5Hr1G124670	1	http://amigo.geneontology.org/amigo/term/GO:0044093
biological_process	response to heat	GO:0009408	1	85	1.68	0.451	HORVU6Hr1G063810	1	http://amigo.geneontology.org/amigo/term/GO:0009408
biological_process	regulation of mRNA metabolic process	GO:1903311	1	86	1.66	0.455	HORVU4Hr1G088210	1	http://amigo.geneontology.org/amigo/term/GO:1903311
biological_process	protein autophosphorylation	GO:0046777	1	86	1.66	0.455	HORVU4Hr1G087720	1	http://amigo.geneontology.org/amigo/term/GO:0046777
biological_process	protein phosphorylation	GO:0006468	18	1563	1.65	0.0416	HORVU2Hr1G002830|HORVU2Hr1G002840|HORVU4Hr1G087060|HORVU4Hr1G088650|HORVU2Hr1G002750|HORVU5Hr1G124810|HORVU2Hr1G091360|HORVU2Hr1G002690|HORVU4Hr1G088090|HORVU2Hr1G002660|HORVU5Hr1G094510|HORVU2Hr1G091090|HORVU4Hr1G088690|HORVU4Hr1G087720|HORVU6Hr1G064150|HORVU5Hr1G124800|HORVU6Hr1G064110|HORVU6Hr1G064130	1	http://amigo.geneontology.org/amigo/term/GO:0006468
biological_process	secretion	GO:0046903	1	87	1.64	0.459	HORVU7Hr1G103510	1	http://amigo.geneontology.org/amigo/term/GO:0046903
biological_process	protein localization	GO:0008104	8	705	1.62	0.165	HORVU2Hr1G091290|HORVU7Hr1G101390|HORVU5Hr1G124770|HORVU7Hr1G103510|HORVU6Hr1G016100|HORVU2Hr1G091230|HORVU5Hr1G094410|HORVU4Hr1G088390	1	http://amigo.geneontology.org/amigo/term/GO:0008104
biological_process	proteolysis	GO:0006508	14	1235	1.62	0.079	HORVU4Hr1G088660|HORVU6Hr1G063860|HORVU6Hr1G063910|HORVU4Hr1G088530|HORVU6Hr1G016200|HORVU6Hr1G016120|HORVU4Hr1G087120|HORVU4Hr1G088470|HORVU7Hr1G103330|HORVU6Hr1G064070|HORVU2Hr1G091220|HORVU7Hr1G103380|HORVU6Hr1G064450|HORVU6Hr1G064230	1	http://amigo.geneontology.org/amigo/term/GO:0006508
biological_process	ribonucleotide metabolic process	GO:0009259	3	265	1.62	0.439	HORVU4Hr1G088440|HORVU5Hr1G124820|HORVU4Hr1G087110	1	http://amigo.geneontology.org/amigo/term/GO:0009259
biological_process	response to organonitrogen compound	GO:0010243	1	89	1.61	0.466	HORVU2Hr1G091220	1	http://amigo.geneontology.org/amigo/term/GO:0010243
biological_process	organophosphate metabolic process	GO:0019637	7	635	1.58	0.222	HORVU2Hr1G091290|HORVU4Hr1G088440|HORVU5Hr1G124820|HORVU4Hr1G087110|HORVU4Hr1G087230|HORVU2Hr1G003110|HORVU4Hr1G088470	1	http://amigo.geneontology.org/amigo/term/GO:0019637
biological_process	protein transport	GO:0015031	7	637	1.57	0.223	HORVU7Hr1G101390|HORVU5Hr1G124770|HORVU7Hr1G103510|HORVU6Hr1G016100|HORVU2Hr1G091230|HORVU5Hr1G094410|HORVU4Hr1G088390	1	http://amigo.geneontology.org/amigo/term/GO:0015031
biological_process	membrane lipid biosynthetic process	GO:0046467	1	91	1.57	0.473	HORVU2Hr1G091290	1	http://amigo.geneontology.org/amigo/term/GO:0046467
biological_process	transition metal ion transport	GO:0000041	1	91	1.57	0.473	HORVU5Hr1G094430	1	http://amigo.geneontology.org/amigo/term/GO:0000041
biological_process	ribose phosphate metabolic process	GO:0019693	3	273	1.57	0.445	HORVU4Hr1G088440|HORVU5Hr1G124820|HORVU4Hr1G087110	1	http://amigo.geneontology.org/amigo/term/GO:0019693
biological_process	hemicellulose metabolic process	GO:0010410	1	91	1.57	0.473	HORVU2Hr1G091270	1	http://amigo.geneontology.org/amigo/term/GO:0010410
biological_process	organic substance transport	GO:0071702	13	1186	1.57	0.108	HORVU4Hr1G088020|HORVU4Hr1G087670|HORVU5Hr1G124770|HORVU6Hr1G016100|HORVU2Hr1G091230|HORVU5Hr1G094410|HORVU4Hr1G088060|HORVU4Hr1G088390|HORVU7Hr1G101390|HORVU7Hr1G103510|HORVU7Hr1G101310|HORVU6Hr1G064220|HORVU6Hr1G064010	1	http://amigo.geneontology.org/amigo/term/GO:0071702
biological_process	regulation of response to stress	GO:0080134	1	92	1.56	0.477	HORVU4Hr1G087520	1	http://amigo.geneontology.org/amigo/term/GO:0080134
biological_process	auxin-activated signaling pathway	GO:0009734	1	92	1.56	0.477	HORVU7Hr1G101270	1	http://amigo.geneontology.org/amigo/term/GO:0009734
biological_process	endomembrane system organization	GO:0010256	1	92	1.56	0.477	HORVU5Hr1G094410	1	http://amigo.geneontology.org/amigo/term/GO:0010256
biological_process	RNA methylation	GO:0001510	1	92	1.56	0.477	HORVU5Hr1G094580	1	http://amigo.geneontology.org/amigo/term/GO:0001510
biological_process	macromolecule methylation	GO:0043414	2	184	1.56	0.37	HORVU7Hr1G103420|HORVU5Hr1G094580	1	http://amigo.geneontology.org/amigo/term/GO:0043414
biological_process	meiotic cell cycle process	GO:1903046	1	92	1.56	0.477	HORVU4Hr1G087200	1	http://amigo.geneontology.org/amigo/term/GO:1903046
biological_process	establishment of protein localization	GO:0045184	7	644	1.56	0.227	HORVU7Hr1G101390|HORVU5Hr1G124770|HORVU7Hr1G103510|HORVU6Hr1G016100|HORVU2Hr1G091230|HORVU5Hr1G094410|HORVU4Hr1G088390	1	http://amigo.geneontology.org/amigo/term/GO:0045184
biological_process	negative regulation of macromolecule metabolic process	GO:0010605	5	463	1.55	0.264	HORVU4Hr1G088210|HORVU4Hr1G087400|HORVU4Hr1G087430|HORVU4Hr1G087340|HORVU7Hr1G101470	1	http://amigo.geneontology.org/amigo/term/GO:0010605
biological_process	cellular response to auxin stimulus	GO:0071365	1	93	1.54	0.481	HORVU7Hr1G101270	1	http://amigo.geneontology.org/amigo/term/GO:0071365
biological_process	glycerolipid metabolic process	GO:0046486	2	186	1.54	0.375	HORVU2Hr1G091290|HORVU4Hr1G088470	1	http://amigo.geneontology.org/amigo/term/GO:0046486
biological_process	catabolic process	GO:0009056	18	1679	1.53	0.0706	HORVU4Hr1G087680|HORVU4Hr1G088660|HORVU2Hr1G091270|HORVU4Hr1G088210|HORVU4Hr1G087990|HORVU6Hr1G016200|HORVU2Hr1G002930|HORVU5Hr1G094540|HORVU6Hr1G016120|HORVU6Hr1G015670|HORVU4Hr1G087230|HORVU2Hr1G002880|HORVU4Hr1G087120|HORVU2Hr1G003110|HORVU7Hr1G103330|HORVU2Hr1G091220|HORVU7Hr1G103380|HORVU6Hr1G064450	1	http://amigo.geneontology.org/amigo/term/GO:0009056
biological_process	negative regulation of cellular process	GO:0048523	5	468	1.53	0.269	HORVU4Hr1G088210|HORVU4Hr1G087400|HORVU4Hr1G087430|HORVU4Hr1G087340|HORVU7Hr1G101470	1	http://amigo.geneontology.org/amigo/term/GO:0048523
biological_process	cellular catabolic process	GO:0044248	15	1409	1.52	0.101	HORVU4Hr1G087680|HORVU4Hr1G088660|HORVU2Hr1G091270|HORVU4Hr1G088210|HORVU4Hr1G087990|HORVU6Hr1G016200|HORVU5Hr1G094540|HORVU6Hr1G016120|HORVU4Hr1G087230|HORVU4Hr1G087120|HORVU2Hr1G003110|HORVU7Hr1G103330|HORVU2Hr1G091220|HORVU7Hr1G103380|HORVU6Hr1G064450	1	http://amigo.geneontology.org/amigo/term/GO:0044248
biological_process	negative regulation of metabolic process	GO:0009892	5	471	1.52	0.392	HORVU4Hr1G088210|HORVU4Hr1G087400|HORVU4Hr1G087430|HORVU4Hr1G087340|HORVU7Hr1G101470	1	http://amigo.geneontology.org/amigo/term/GO:0009892
biological_process	positive regulation of cellular catabolic process	GO:0031331	1	95	1.51	0.488	HORVU4Hr1G088210	1	http://amigo.geneontology.org/amigo/term/GO:0031331
biological_process	response to stress	GO:0006950	18	1713	1.5	0.0994	HORVU2Hr1G002840|HORVU6Hr1G064620|HORVU6Hr1G063850|HORVU2Hr1G002750|HORVU2Hr1G091360|HORVU6Hr1G063810|HORVU4Hr1G087520|HORVU4Hr1G088610|HORVU6Hr1G063830|HORVU6Hr1G016230|HORVU4Hr1G087400|HORVU7Hr1G103800|HORVU4Hr1G087430|HORVU4Hr1G087340|HORVU4Hr1G088690|HORVU2Hr1G091220|HORVU7Hr1G101470|HORVU7Hr1G101690	1	http://amigo.geneontology.org/amigo/term/GO:0006950
biological_process	chromatin organization	GO:0006325	2	191	1.5	0.388	HORVU6Hr1G063900|HORVU5Hr1G094500	1	http://amigo.geneontology.org/amigo/term/GO:0006325
biological_process	amine metabolic process	GO:0009308	1	96	1.49	0.492	HORVU5Hr1G124750	1	http://amigo.geneontology.org/amigo/term/GO:0009308
biological_process	phosphatidylinositol metabolic process	GO:0046488	1	96	1.49	0.492	HORVU2Hr1G091290	1	http://amigo.geneontology.org/amigo/term/GO:0046488
biological_process	regulation of cellular protein metabolic process	GO:0032268	5	480	1.49	0.396	HORVU4Hr1G088210|HORVU4Hr1G087400|HORVU4Hr1G087430|HORVU4Hr1G087340|HORVU7Hr1G101470	1	http://amigo.geneontology.org/amigo/term/GO:0032268
biological_process	ubiquitin-dependent protein catabolic process	GO:0006511	5	484	1.48	0.398	HORVU4Hr1G088660|HORVU6Hr1G016120|HORVU2Hr1G091220|HORVU4Hr1G087120|HORVU6Hr1G064450	1	http://amigo.geneontology.org/amigo/term/GO:0006511
biological_process	proteasomal protein catabolic process	GO:0010498	3	291	1.48	0.462	HORVU4Hr1G088660|HORVU2Hr1G091220|HORVU6Hr1G064450	1	http://amigo.geneontology.org/amigo/term/GO:0010498
biological_process	beta-glucan metabolic process	GO:0051273	1	97	1.48	0.495	HORVU4Hr1G087990	1	http://amigo.geneontology.org/amigo/term/GO:0051273
biological_process	regulation of cell communication	GO:0010646	1	98	1.46	0.499	HORVU4Hr1G087520	1	http://amigo.geneontology.org/amigo/term/GO:0010646
biological_process	regulation of signaling	GO:0023051	1	98	1.46	0.499	HORVU4Hr1G087520	1	http://amigo.geneontology.org/amigo/term/GO:0023051
biological_process	regulation of signal transduction	GO:0009966	1	98	1.46	0.499	HORVU4Hr1G087520	1	http://amigo.geneontology.org/amigo/term/GO:0009966
biological_process	regulation of protein metabolic process	GO:0051246	5	497	1.44	0.405	HORVU4Hr1G088210|HORVU4Hr1G087400|HORVU4Hr1G087430|HORVU4Hr1G087340|HORVU7Hr1G101470	1	http://amigo.geneontology.org/amigo/term/GO:0051246
biological_process	ribosomal small subunit biogenesis	GO:0042274	1	100	1.43	0.506	HORVU6Hr1G016260	1	http://amigo.geneontology.org/amigo/term/GO:0042274
biological_process	regulation of hormone levels	GO:0010817	1	101	1.42	0.509	HORVU5Hr1G124750	1	http://amigo.geneontology.org/amigo/term/GO:0010817
biological_process	phosphorylation	GO:0016310	18	1833	1.41	0.148	HORVU2Hr1G002830|HORVU2Hr1G002840|HORVU4Hr1G087060|HORVU4Hr1G088650|HORVU2Hr1G002750|HORVU5Hr1G124810|HORVU2Hr1G091360|HORVU2Hr1G002690|HORVU4Hr1G088090|HORVU2Hr1G002660|HORVU5Hr1G094510|HORVU2Hr1G091090|HORVU4Hr1G088690|HORVU4Hr1G087720|HORVU6Hr1G064150|HORVU5Hr1G124800|HORVU6Hr1G064110|HORVU6Hr1G064130	1	http://amigo.geneontology.org/amigo/term/GO:0016310
biological_process	organonitrogen compound catabolic process	GO:1901565	8	820	1.4	0.291	HORVU7Hr1G103330|HORVU4Hr1G088660|HORVU6Hr1G016200|HORVU6Hr1G016120|HORVU2Hr1G091220|HORVU7Hr1G103380|HORVU4Hr1G087120|HORVU6Hr1G064450	1	http://amigo.geneontology.org/amigo/term/GO:1901565
biological_process	phosphate-containing compound metabolic process	GO:0006796	25	2568	1.39	0.0859	HORVU2Hr1G002660|HORVU2Hr1G002690|HORVU2Hr1G002750|HORVU2Hr1G002830|HORVU2Hr1G002840|HORVU2Hr1G003110|HORVU2Hr1G091090|HORVU2Hr1G091290|HORVU2Hr1G091360|HORVU4Hr1G087060|HORVU4Hr1G087110|HORVU4Hr1G087230|HORVU4Hr1G087720|HORVU4Hr1G088090|HORVU4Hr1G088440|HORVU4Hr1G088470|HORVU4Hr1G088650|HORVU4Hr1G088690|HORVU5Hr1G094510|HORVU5Hr1G124800|HORVU5Hr1G124810|HORVU5Hr1G124820|HORVU6Hr1G064110|HORVU6Hr…	1	http://amigo.geneontology.org/amigo/term/GO:0006796
biological_process	cell wall polysaccharide metabolic process	GO:0010383	1	103	1.39	0.516	HORVU2Hr1G091270	1	http://amigo.geneontology.org/amigo/term/GO:0010383
biological_process	response to abscisic acid	GO:0009737	1	103	1.39	0.516	HORVU6Hr1G064620	1	http://amigo.geneontology.org/amigo/term/GO:0009737
biological_process	regulation of cellular macromolecule biosynthetic process	GO:2000112	21	2180	1.38	0.143	HORVU4Hr1G087580|HORVU6Hr1G015950|HORVU4Hr1G088210|HORVU4Hr1G087400|HORVU6Hr1G016250|HORVU6Hr1G015670|HORVU4Hr1G087430|HORVU6Hr1G016240|HORVU5Hr1G125110|HORVU4Hr1G088280|HORVU4Hr1G087340|HORVU5Hr1G125050|HORVU4Hr1G087590|HORVU4Hr1G088690|HORVU4Hr1G087360|HORVU7Hr1G101270|HORVU7Hr1G103420|HORVU4Hr1G087610|HORVU6Hr1G064370|HORVU4Hr1G087700|HORVU7Hr1G101470	1	http://amigo.geneontology.org/amigo/term/GO:2000112
biological_process	regulation of macromolecule biosynthetic process	GO:0010556	21	2182	1.38	0.143	HORVU4Hr1G087580|HORVU6Hr1G015950|HORVU4Hr1G088210|HORVU4Hr1G087400|HORVU6Hr1G016250|HORVU6Hr1G015670|HORVU4Hr1G087430|HORVU6Hr1G016240|HORVU5Hr1G125110|HORVU4Hr1G088280|HORVU4Hr1G087340|HORVU5Hr1G125050|HORVU4Hr1G087590|HORVU4Hr1G088690|HORVU4Hr1G087360|HORVU7Hr1G101270|HORVU7Hr1G103420|HORVU4Hr1G087610|HORVU6Hr1G064370|HORVU4Hr1G087700|HORVU7Hr1G101470	1	http://amigo.geneontology.org/amigo/term/GO:0010556
biological_process	response to alcohol	GO:0097305	1	104	1.38	0.519	HORVU6Hr1G064620	1	http://amigo.geneontology.org/amigo/term/GO:0097305
biological_process	lipid modification	GO:0030258	1	104	1.38	0.519	HORVU4Hr1G087680	1	http://amigo.geneontology.org/amigo/term/GO:0030258
biological_process	regulation of cellular biosynthetic process	GO:0031326	21	2190	1.37	0.144	HORVU4Hr1G087580|HORVU6Hr1G015950|HORVU4Hr1G088210|HORVU4Hr1G087400|HORVU6Hr1G016250|HORVU6Hr1G015670|HORVU4Hr1G087430|HORVU6Hr1G016240|HORVU5Hr1G125110|HORVU4Hr1G088280|HORVU4Hr1G087340|HORVU5Hr1G125050|HORVU4Hr1G087590|HORVU4Hr1G088690|HORVU4Hr1G087360|HORVU7Hr1G101270|HORVU7Hr1G103420|HORVU4Hr1G087610|HORVU6Hr1G064370|HORVU4Hr1G087700|HORVU7Hr1G101470	1	http://amigo.geneontology.org/amigo/term/GO:0031326
biological_process	regulation of biosynthetic process	GO:0009889	21	2192	1.37	0.144	HORVU4Hr1G087400|HORVU6Hr1G016250|HORVU4Hr1G087430|HORVU6Hr1G063900|HORVU6Hr1G016240|HORVU5Hr1G125110|HORVU4Hr1G088280|HORVU4Hr1G087340|HORVU5Hr1G125050|HORVU4Hr1G087590|HORVU4Hr1G088690|HORVU4Hr1G087360|HORVU7Hr1G101270|HORVU7Hr1G103420|HORVU4Hr1G087610|HORVU6Hr1G064370|HORVU4Hr1G087700|HORVU7Hr1G101470	1	http://amigo.geneontology.org/amigo/term/GO:0009889
biological_process	phosphorus metabolic process	GO:0006793	25	2613	1.37	0.112	HORVU2Hr1G002660|HORVU2Hr1G002690|HORVU2Hr1G002750|HORVU2Hr1G002830|HORVU2Hr1G002840|HORVU2Hr1G003110|HORVU2Hr1G091090|HORVU2Hr1G091290|HORVU2Hr1G091360|HORVU4Hr1G087060|HORVU4Hr1G087110|HORVU4Hr1G087230|HORVU4Hr1G087720|HORVU4Hr1G088090|HORVU4Hr1G088440|HORVU4Hr1G088470|HORVU4Hr1G088650|HORVU4Hr1G088690|HORVU5Hr1G094510|HORVU5Hr1G124800|HORVU5Hr1G124810|HORVU5Hr1G124820|HORVU6Hr1G064110|HORVU6Hr…	1	http://amigo.geneontology.org/amigo/term/GO:0006793
biological_process	nuclear transport	GO:0051169	1	105	1.36	0.523	HORVU5Hr1G124770	1	http://amigo.geneontology.org/amigo/term/GO:0051169
biological_process	nucleocytoplasmic transport	GO:0006913	1	105	1.36	0.523	HORVU5Hr1G124770	1	http://amigo.geneontology.org/amigo/term/GO:0006913
biological_process	cellular response to stress	GO:0033554	7	735	1.36	0.367	HORVU6Hr1G063810|HORVU4Hr1G088610|HORVU6Hr1G016230|HORVU2Hr1G091220|HORVU7Hr1G103800|HORVU7Hr1G101690|HORVU4Hr1G088690	1	http://amigo.geneontology.org/amigo/term/GO:0033554
biological_process	phospholipid metabolic process	GO:0006644	2	210	1.36	0.661	HORVU2Hr1G091290|HORVU4Hr1G088470	1	http://amigo.geneontology.org/amigo/term/GO:0006644
biological_process	membrane lipid metabolic process	GO:0006643	1	106	1.35	0.526	HORVU2Hr1G091290	1	http://amigo.geneontology.org/amigo/term/GO:0006643
biological_process	response to external stimulus	GO:0009605	3	321	1.34	0.494	HORVU2Hr1G002840|HORVU2Hr1G002750|HORVU2Hr1G091360	1	http://amigo.geneontology.org/amigo/term/GO:0009605
biological_process	regulation of organelle organization	GO:0033043	1	107	1.34	0.529	HORVU7Hr1G103510	1	http://amigo.geneontology.org/amigo/term/GO:0033043
biological_process	positive regulation of catabolic process	GO:0009896	1	107	1.34	0.529	HORVU4Hr1G088210	1	http://amigo.geneontology.org/amigo/term/GO:0009896
biological_process	regulation of gene expression	GO:0010468	22	2363	1.33	0.16	HORVU4Hr1G087580|HORVU6Hr1G015950|HORVU4Hr1G088210|HORVU4Hr1G087400|HORVU6Hr1G016250|HORVU6Hr1G015670|HORVU4Hr1G087430|HORVU6Hr1G063900|HORVU6Hr1G016240|HORVU5Hr1G125110|HORVU4Hr1G088280|HORVU4Hr1G087340|HORVU5Hr1G125050|HORVU4Hr1G087590|HORVU4Hr1G088690|HORVU4Hr1G087360|HORVU7Hr1G101270|HORVU7Hr1G103420|HORVU4Hr1G087610|HORVU6Hr1G064370|HORVU4Hr1G087700|HORVU7Hr1G101470	1	http://amigo.geneontology.org/amigo/term/GO:0010468
biological_process	cellular protein localization	GO:0034613	5	543	1.32	0.437	HORVU2Hr1G091290|HORVU5Hr1G124770|HORVU6Hr1G016100|HORVU5Hr1G094410|HORVU4Hr1G088390	1	http://amigo.geneontology.org/amigo/term/GO:0034613
biological_process	regulation of cellular catabolic process	GO:0031329	1	109	1.31	0.536	HORVU4Hr1G088210	1	http://amigo.geneontology.org/amigo/term/GO:0031329
biological_process	cellular response to DNA damage stimulus	GO:0006974	4	439	1.3	0.555	HORVU6Hr1G016230|HORVU7Hr1G103800|HORVU7Hr1G101690|HORVU4Hr1G088690	1	http://amigo.geneontology.org/amigo/term/GO:0006974
biological_process	nitrogen compound transport	GO:0071705	9	992	1.3	0.435	HORVU4Hr1G087740|HORVU5Hr1G094540|HORVU7Hr1G103800|HORVU5Hr1G094410|HORVU4Hr1G087200|HORVU6Hr1G063900|HORVU5Hr1G094500|HORVU6Hr1G015900|HORVU7Hr1G101690|HORVU4Hr1G088690	1	http://amigo.geneontology.org/amigo/term/GO:0071705
biological_process	nucleotide metabolic process	GO:0009117	3	331	1.3	0.506	HORVU4Hr1G088440|HORVU5Hr1G124820|HORVU4Hr1G087110	1	http://amigo.geneontology.org/amigo/term/GO:0009117
biological_process	cellular macromolecule localization	GO:0070727	5	552	1.3	0.444	HORVU2Hr1G091290|HORVU5Hr1G124770|HORVU6Hr1G016100|HORVU5Hr1G094410|HORVU4Hr1G088390	1	http://amigo.geneontology.org/amigo/term/GO:0070727
biological_process	anion transport	GO:0006820	2	221	1.3	0.67	HORVU4Hr1G088020|HORVU4Hr1G087350	1	http://amigo.geneontology.org/amigo/term/GO:0006820
biological_process	response to oxygen-containing compound	GO:1901700	3	332	1.29	0.507	HORVU4Hr1G088020|HORVU6Hr1G064620|HORVU2Hr1G002630	1	http://amigo.geneontology.org/amigo/term/GO:1901700
biological_process	DNA recombination	GO:0006310	2	222	1.29	0.671	HORVU7Hr1G103800|HORVU7Hr1G101690	1	http://amigo.geneontology.org/amigo/term/GO:0006310
biological_process	cellular lipid catabolic process	GO:0044242	1	113	1.27	0.548	HORVU4Hr1G087680	1	http://amigo.geneontology.org/amigo/term/GO:0044242
biological_process	meiotic cell cycle	GO:0051321	1	114	1.26	0.552	HORVU4Hr1G087200	1	http://amigo.geneontology.org/amigo/term/GO:0051321
biological_process	vesicle-mediated transport	GO:0016192	4	458	1.25	0.567	HORVU6Hr1G016100|HORVU2Hr1G091230|HORVU5Hr1G094410|HORVU4Hr1G088390	1	http://amigo.geneontology.org/amigo/term/GO:0016192
biological_process	RNA catabolic process	GO:0006401	1	115	1.24	0.555	HORVU4Hr1G088210	1	http://amigo.geneontology.org/amigo/term/GO:0006401
biological_process	tRNA metabolic process	GO:0006399	2	230	1.24	0.677	HORVU5Hr1G094580|HORVU2Hr1G091370	1	http://amigo.geneontology.org/amigo/term/GO:0006399
biological_process	cellular protein modification process	GO:0006464	28	3223	1.24	0.223	HORVU2Hr1G002660|HORVU2Hr1G002690|HORVU2Hr1G002750|HORVU2Hr1G002830|HORVU2Hr1G002840|HORVU2Hr1G091090|HORVU2Hr1G091220|HORVU2Hr1G091290|HORVU2Hr1G091360|HORVU4Hr1G087060|HORVU4Hr1G087120|HORVU4Hr1G087720|HORVU4Hr1G088090|HORVU4Hr1G088650|HORVU4Hr1G088660|HORVU4Hr1G088690|HORVU5Hr1G094510|HORVU5Hr1G124800|HORVU5Hr1G124810|HORVU6Hr1G016120|HORVU6Hr1G016200|HORVU6Hr1G064110|HORVU6Hr1G064130|HORVU6Hr…	1	http://amigo.geneontology.org/amigo/term/GO:0006464
biological_process	protein modification process	GO:0036211	28	3223	1.24	0.223	HORVU2Hr1G002660|HORVU2Hr1G002690|HORVU2Hr1G002750|HORVU2Hr1G002830|HORVU2Hr1G002840|HORVU2Hr1G091090|HORVU2Hr1G091220|HORVU2Hr1G091290|HORVU2Hr1G091360|HORVU4Hr1G087060|HORVU4Hr1G087120|HORVU4Hr1G087720|HORVU4Hr1G088090|HORVU4Hr1G088650|HORVU4Hr1G088660|HORVU4Hr1G088690|HORVU5Hr1G094510|HORVU5Hr1G124800|HORVU5Hr1G124810|HORVU6Hr1G016120|HORVU6Hr1G016200|HORVU6Hr1G064110|HORVU6Hr1G064130|HORVU6Hr…	1	http://amigo.geneontology.org/amigo/term/GO:0036211
biological_process	organelle localization	GO:0051640	1	116	1.23	0.558	HORVU5Hr1G124770	1	http://amigo.geneontology.org/amigo/term/GO:0051640
biological_process	response to endoplasmic reticulum stress	GO:0034976	1	117	1.22	0.561	HORVU2Hr1G091220	1	http://amigo.geneontology.org/amigo/term/GO:0034976
biological_process	intracellular protein transport	GO:0006886	4	471	1.22	0.576	HORVU5Hr1G124770|HORVU6Hr1G016100|HORVU5Hr1G094410|HORVU4Hr1G088390	1	http://amigo.geneontology.org/amigo/term/GO:0006886
biological_process	peptidyl-lysine modification	GO:0018205	1	118	1.21	0.564	HORVU7Hr1G103420	1	http://amigo.geneontology.org/amigo/term/GO:0018205
biological_process	macromolecule modification	GO:0043412	30	3542	1.21	0.287	HORVU2Hr1G002660|HORVU2Hr1G002690|HORVU2Hr1G002750|HORVU2Hr1G002830|HORVU2Hr1G002840|HORVU2Hr1G091090|HORVU2Hr1G091220|HORVU2Hr1G091290|HORVU2Hr1G091360|HORVU2Hr1G091370|HORVU4Hr1G087060|HORVU4Hr1G087120|HORVU4Hr1G087720|HORVU4Hr1G088090|HORVU4Hr1G088650|HORVU4Hr1G088660|HORVU4Hr1G088690|HORVU5Hr1G094510|HORVU5Hr1G094580|HORVU5Hr1G124800|HORVU5Hr1G124810|HORVU6Hr1G016120|HORVU6Hr1G016200|HORVU6Hr…	1	http://amigo.geneontology.org/amigo/term/GO:0043412
biological_process	negative regulation of biological process	GO:0048519	5	599	1.19	0.617	HORVU4Hr1G088210|HORVU4Hr1G087400|HORVU4Hr1G087430|HORVU4Hr1G087340|HORVU7Hr1G101470	1	http://amigo.geneontology.org/amigo/term/GO:0048519
biological_process	fatty acid metabolic process	GO:0006631	2	241	1.19	0.687	HORVU4Hr1G087680|HORVU6Hr1G016280	1	http://amigo.geneontology.org/amigo/term/GO:0006631
biological_process	regulation of nitrogen compound metabolic process	GO:0051171	21	2563	1.17	0.459	HORVU4Hr1G087580|HORVU6Hr1G015950|HORVU4Hr1G088210|HORVU4Hr1G087400|HORVU6Hr1G016250|HORVU6Hr1G015670|HORVU4Hr1G087430|HORVU6Hr1G016240|HORVU5Hr1G125110|HORVU4Hr1G088280|HORVU4Hr1G087340|HORVU5Hr1G125050|HORVU4Hr1G087590|HORVU4Hr1G088690|HORVU4Hr1G087360|HORVU7Hr1G101270|HORVU7Hr1G103420|HORVU4Hr1G087610|HORVU6Hr1G064370|HORVU4Hr1G087700|HORVU7Hr1G101470	1	http://amigo.geneontology.org/amigo/term/GO:0051171
biological_process	regulation of primary metabolic process	GO:0080090	21	2575	1.17	0.46	HORVU4Hr1G087580|HORVU6Hr1G015950|HORVU4Hr1G088210|HORVU4Hr1G087400|HORVU6Hr1G016250|HORVU6Hr1G015670|HORVU4Hr1G087430|HORVU6Hr1G016240|HORVU5Hr1G125110|HORVU4Hr1G088280|HORVU4Hr1G087340|HORVU5Hr1G125050|HORVU4Hr1G087590|HORVU4Hr1G088690|HORVU4Hr1G087360|HORVU7Hr1G101270|HORVU7Hr1G103420|HORVU4Hr1G087610|HORVU6Hr1G064370|HORVU4Hr1G087700|HORVU7Hr1G101470	1	http://amigo.geneontology.org/amigo/term/GO:0080090
biological_process	cell wall macromolecule metabolic process	GO:0044036	1	123	1.16	0.579	HORVU2Hr1G091270	1	http://amigo.geneontology.org/amigo/term/GO:0044036
biological_process	metal ion transport	GO:0030001	2	246	1.16	0.692	HORVU4Hr1G087960|HORVU5Hr1G094430	1	http://amigo.geneontology.org/amigo/term/GO:0030001
biological_process	regulation of RNA metabolic process	GO:0051252	17	2097	1.16	0.499	HORVU4Hr1G087580|HORVU6Hr1G015950|HORVU4Hr1G088210|HORVU6Hr1G016250|HORVU6Hr1G063900|HORVU6Hr1G016240|HORVU5Hr1G125110|HORVU4Hr1G088280|HORVU5Hr1G125050|HORVU4Hr1G087590|HORVU4Hr1G088690|HORVU4Hr1G087360|HORVU7Hr1G101270|HORVU7Hr1G103420|HORVU4Hr1G087610|HORVU6Hr1G064370|HORVU4Hr1G087700	1	http://amigo.geneontology.org/amigo/term/GO:0051252
biological_process	microtubule cytoskeleton organization	GO:0000226	1	124	1.15	0.582	HORVU4Hr1G087740	1	http://amigo.geneontology.org/amigo/term/GO:0000226
biological_process	response to hormone	GO:0009725	4	497	1.15	0.782	HORVU6Hr1G064620|HORVU7Hr1G101270|HORVU2Hr1G002630|HORVU6Hr1G064370	1	http://amigo.geneontology.org/amigo/term/GO:0009725
biological_process	response to endogenous stimulus	GO:0009719	4	498	1.15	0.782	HORVU6Hr1G064620|HORVU7Hr1G101270|HORVU2Hr1G002630|HORVU6Hr1G064370	1	http://amigo.geneontology.org/amigo/term/GO:0009719
biological_process	regulation of cellular metabolic process	GO:0031323	21	2616	1.15	0.466	HORVU4Hr1G087580|HORVU6Hr1G015950|HORVU4Hr1G088210|HORVU4Hr1G087400|HORVU6Hr1G016250|HORVU6Hr1G015670|HORVU4Hr1G087430|HORVU6Hr1G016240|HORVU5Hr1G125110|HORVU4Hr1G088280|HORVU4Hr1G087340|HORVU5Hr1G125050|HORVU4Hr1G087590|HORVU4Hr1G088690|HORVU4Hr1G087360|HORVU7Hr1G101270|HORVU7Hr1G103420|HORVU4Hr1G087610|HORVU6Hr1G064370|HORVU4Hr1G087700|HORVU7Hr1G101470	1	http://amigo.geneontology.org/amigo/term/GO:0031323
biological_process	regulation of catabolic process	GO:0009894	1	125	1.14	0.585	HORVU4Hr1G088210	1	http://amigo.geneontology.org/amigo/term/GO:0009894
biological_process	regulation of RNA biosynthetic process	GO:2001141	16	2007	1.14	0.58	HORVU4Hr1G087580|HORVU6Hr1G015950|HORVU6Hr1G016250|HORVU6Hr1G063900|HORVU6Hr1G016240|HORVU5Hr1G125110|HORVU4Hr1G088280|HORVU5Hr1G125050|HORVU4Hr1G087590|HORVU4Hr1G088690|HORVU4Hr1G087360|HORVU7Hr1G101270|HORVU7Hr1G103420|HORVU4Hr1G087610|HORVU6Hr1G064370|HORVU4Hr1G087700	1	http://amigo.geneontology.org/amigo/term/GO:2001141
biological_process	regulation of transcription, DNA-templated	GO:0006355	16	2007	1.14	0.58	HORVU4Hr1G087580|HORVU6Hr1G015950|HORVU6Hr1G016250|HORVU6Hr1G063900|HORVU6Hr1G016240|HORVU5Hr1G125110|HORVU4Hr1G088280|HORVU5Hr1G125050|HORVU4Hr1G087590|HORVU4Hr1G088690|HORVU4Hr1G087360|HORVU7Hr1G101270|HORVU7Hr1G103420|HORVU4Hr1G087610|HORVU6Hr1G064370|HORVU4Hr1G087700	1	http://amigo.geneontology.org/amigo/term/GO:0006355
biological_process	regulation of nucleic acid-templated transcription	GO:1903506	16	2007	1.14	0.58	HORVU4Hr1G087580|HORVU6Hr1G015950|HORVU6Hr1G016250|HORVU6Hr1G063900|HORVU6Hr1G016240|HORVU5Hr1G125110|HORVU4Hr1G088280|HORVU5Hr1G125050|HORVU4Hr1G087590|HORVU4Hr1G088690|HORVU4Hr1G087360|HORVU7Hr1G101270|HORVU7Hr1G103420|HORVU4Hr1G087610|HORVU6Hr1G064370|HORVU4Hr1G087700	1	http://amigo.geneontology.org/amigo/term/GO:1903506
biological_process	regulation of nucleobase-containing compound metabolic process	GO:0019219	17	2133	1.14	0.59	HORVU4Hr1G087580|HORVU6Hr1G015950|HORVU4Hr1G088210|HORVU6Hr1G016250|HORVU6Hr1G063900|HORVU6Hr1G016240|HORVU5Hr1G125110|HORVU4Hr1G088280|HORVU5Hr1G125050|HORVU4Hr1G087590|HORVU4Hr1G088690|HORVU4Hr1G087360|HORVU7Hr1G101270|HORVU7Hr1G103420|HORVU4Hr1G087610|HORVU6Hr1G064370|HORVU4Hr1G087700	1	http://amigo.geneontology.org/amigo/term/GO:0019219
biological_process	regulation of macromolecule metabolic process	GO:0060255	22	2772	1.14	0.552	HORVU4Hr1G087580|HORVU6Hr1G015950|HORVU4Hr1G088210|HORVU4Hr1G087400|HORVU6Hr1G016250|HORVU6Hr1G015670|HORVU4Hr1G087430|HORVU6Hr1G063900|HORVU6Hr1G016240|HORVU5Hr1G125110|HORVU4Hr1G088280|HORVU4Hr1G087340|HORVU5Hr1G125050|HORVU4Hr1G087590|HORVU4Hr1G088690|HORVU4Hr1G087360|HORVU7Hr1G101270|HORVU7Hr1G103420|HORVU4Hr1G087610|HORVU6Hr1G064370|HORVU4Hr1G087700|HORVU7Hr1G101470	1	http://amigo.geneontology.org/amigo/term/GO:0060255
biological_process	cellular polysaccharide metabolic process	GO:0044264	2	253	1.13	0.698	HORVU2Hr1G091270|HORVU4Hr1G087990	1	http://amigo.geneontology.org/amigo/term/GO:0044264
biological_process	purine ribonucleotide biosynthetic process	GO:0009152	1	127	1.13	0.591	HORVU4Hr1G088440	1	http://amigo.geneontology.org/amigo/term/GO:0009152
biological_process	regulation of transcription by RNA polymerase II	GO:0006357	4	508	1.13	0.784	HORVU4Hr1G087580|HORVU5Hr1G125050|HORVU4Hr1G088690|HORVU4Hr1G087360	1	http://amigo.geneontology.org/amigo/term/GO:0006357
biological_process	proteasome-mediated ubiquitin-dependent protein catabolic process	GO:0043161	2	255	1.12	0.7	HORVU4Hr1G088660|HORVU6Hr1G064450	1	http://amigo.geneontology.org/amigo/term/GO:0043161
biological_process	response to chemical	GO:0042221	9	1153	1.12	0.717	HORVU4Hr1G088020|HORVU6Hr1G064620|HORVU7Hr1G101270|HORVU2Hr1G002630|HORVU5Hr1G124880|HORVU4Hr1G088610|HORVU6Hr1G063830|HORVU6Hr1G064370|HORVU2Hr1G091220	1	http://amigo.geneontology.org/amigo/term/GO:0042221
biological_process	regulation of metabolic process	GO:0019222	22	2823	1.12	0.557	HORVU4Hr1G087580|HORVU6Hr1G015950|HORVU4Hr1G088210|HORVU4Hr1G087400|HORVU6Hr1G016250|HORVU6Hr1G015670|HORVU4Hr1G087430|HORVU6Hr1G063900|HORVU6Hr1G016240|HORVU5Hr1G125110|HORVU4Hr1G088280|HORVU4Hr1G087340|HORVU5Hr1G125050|HORVU4Hr1G087590|HORVU4Hr1G088690|HORVU4Hr1G087360|HORVU7Hr1G101270|HORVU7Hr1G103420|HORVU4Hr1G087610|HORVU6Hr1G064370|HORVU4Hr1G087700|HORVU7Hr1G101470	1	http://amigo.geneontology.org/amigo/term/GO:0019222
biological_process	carboxylic acid catabolic process	GO:0046395	1	129	1.11	0.596	HORVU4Hr1G087680	1	http://amigo.geneontology.org/amigo/term/GO:0046395
biological_process	organophosphate biosynthetic process	GO:0090407	3	390	1.1	0.756	HORVU2Hr1G091290|HORVU4Hr1G088440|HORVU4Hr1G088470	1	http://amigo.geneontology.org/amigo/term/GO:0090407
biological_process	purine nucleotide biosynthetic process	GO:0006164	1	130	1.1	0.599	HORVU4Hr1G088440	1	http://amigo.geneontology.org/amigo/term/GO:0006164
biological_process	cell differentiation	GO:0030154	1	130	1.1	0.599	HORVU4Hr1G088280	1	http://amigo.geneontology.org/amigo/term/GO:0030154
biological_process	generation of precursor metabolites and energy	GO:0006091	5	651	1.1	0.809	HORVU4Hr1G087680|HORVU6Hr1G015640|HORVU6Hr1G064590|HORVU7Hr1G104180|HORVU6Hr1G015900	1	http://amigo.geneontology.org/amigo/term/GO:0006091
biological_process	response to organic substance	GO:0010033	5	652	1.1	0.81	HORVU6Hr1G064620|HORVU7Hr1G101270|HORVU2Hr1G002630|HORVU6Hr1G064370|HORVU2Hr1G091220	1	http://amigo.geneontology.org/amigo/term/GO:0010033
biological_process	cellular protein-containing complex assembly	GO:0034622	4	523	1.09	0.788	HORVU6Hr1G063900|HORVU5Hr1G094500|HORVU6Hr1G015900|HORVU4Hr1G088690	1	http://amigo.geneontology.org/amigo/term/GO:0034622
biological_process	intracellular transport	GO:0046907	5	664	1.08	0.812	HORVU7Hr1G101390|HORVU5Hr1G124770|HORVU6Hr1G016100|HORVU5Hr1G094410|HORVU4Hr1G088390	1	http://amigo.geneontology.org/amigo/term/GO:0046907
biological_process	response to stimulus	GO:0050896	24	3207	1.07	0.738	HORVU2Hr1G002630|HORVU2Hr1G002750|HORVU2Hr1G002840|HORVU2Hr1G091220|HORVU2Hr1G091360|HORVU4Hr1G087060|HORVU4Hr1G087340|HORVU4Hr1G087400|HORVU4Hr1G087430|HORVU4Hr1G087520|HORVU4Hr1G088020|HORVU4Hr1G088610|HORVU4Hr1G088690|HORVU5Hr1G124880|HORVU6Hr1G016230|HORVU6Hr1G063810|HORVU6Hr1G063830|HORVU6Hr1G063850|HORVU6Hr1G064370|HORVU6Hr1G064620|HORVU7Hr1G101270|HORVU7Hr1G101470|HORVU7Hr1G101690|HORVU7Hr…	1	http://amigo.geneontology.org/amigo/term/GO:0050896
biological_process	regulation of biological process	GO:0050789	30	4011	1.07	0.687	HORVU2Hr1G002750|HORVU2Hr1G002840|HORVU2Hr1G091360|HORVU4Hr1G087060|HORVU4Hr1G087340|HORVU4Hr1G087360|HORVU4Hr1G087400|HORVU4Hr1G087430|HORVU4Hr1G087520|HORVU4Hr1G087580|HORVU4Hr1G087590|HORVU4Hr1G087610|HORVU4Hr1G087700|HORVU4Hr1G088010|HORVU4Hr1G088210|HORVU4Hr1G088280|HORVU4Hr1G088690|HORVU5Hr1G124940|HORVU5Hr1G125050|HORVU5Hr1G125110|HORVU6Hr1G015670|HORVU6Hr1G015950|HORVU6Hr1G016240|HORVU6Hr…	1	http://amigo.geneontology.org/amigo/term/GO:0050789
biological_process	purine-containing compound biosynthetic process	GO:0072522	1	134	1.07	0.61	HORVU4Hr1G088440	1	http://amigo.geneontology.org/amigo/term/GO:0072522
biological_process	cellular response to organic substance	GO:0071310	3	402	1.07	0.761	HORVU7Hr1G101270|HORVU6Hr1G064370|HORVU2Hr1G091220	1	http://amigo.geneontology.org/amigo/term/GO:0071310
biological_process	carbohydrate derivative metabolic process	GO:1901135	5	671	1.07	0.813	HORVU2Hr1G091290|HORVU4Hr1G088440|HORVU5Hr1G094580|HORVU5Hr1G124820|HORVU4Hr1G087110	1	http://amigo.geneontology.org/amigo/term/GO:1901135
biological_process	cellular localization	GO:0051641	6	809	1.06	0.829	HORVU2Hr1G091290|HORVU7Hr1G101390|HORVU5Hr1G124770|HORVU6Hr1G016100|HORVU5Hr1G094410|HORVU4Hr1G088390	1	http://amigo.geneontology.org/amigo/term/GO:0051641
biological_process	photosynthesis, light reaction	GO:0019684	1	135	1.06	0.613	HORVU6Hr1G015640	1	http://amigo.geneontology.org/amigo/term/GO:0019684
biological_process	regulation of cellular process	GO:0050794	27	3675	1.05	0.754	HORVU2Hr1G002750|HORVU2Hr1G002840|HORVU2Hr1G091360|HORVU4Hr1G087060|HORVU4Hr1G087340|HORVU4Hr1G087360|HORVU4Hr1G087400|HORVU4Hr1G087430|HORVU4Hr1G087520|HORVU4Hr1G087580|HORVU4Hr1G087590|HORVU4Hr1G087610|HORVU4Hr1G087700|HORVU4Hr1G088210|HORVU4Hr1G088280|HORVU4Hr1G088690|HORVU5Hr1G125050|HORVU5Hr1G125110|HORVU6Hr1G015950|HORVU6Hr1G016240|HORVU6Hr1G016250|HORVU6Hr1G063900|HORVU6Hr1G064370|HORVU7Hr…	1	http://amigo.geneontology.org/amigo/term/GO:0050794
biological_process	ncRNA processing	GO:0034470	3	410	1.05	0.765	HORVU5Hr1G094580|HORVU2Hr1G091370|HORVU6Hr1G016260	1	http://amigo.geneontology.org/amigo/term/GO:0034470
biological_process	transport	GO:0006810	19	2606	1.04	0.807	HORVU4Hr1G088020|HORVU4Hr1G087670|HORVU5Hr1G124880|HORVU5Hr1G124770|HORVU6Hr1G016100|HORVU2Hr1G091230|HORVU4Hr1G087960|HORVU5Hr1G094430|HORVU5Hr1G094410|HORVU4Hr1G088060|HORVU4Hr1G088390|HORVU4Hr1G087350|HORVU7Hr1G101390|HORVU7Hr1G103510|HORVU6Hr1G064140|HORVU7Hr1G101310|HORVU6Hr1G064430|HORVU6Hr1G064220|HORVU6Hr1G064010	1	http://amigo.geneontology.org/amigo/term/GO:0006810
biological_process	localization	GO:0051179	20	2749	1.04	0.812	HORVU4Hr1G088020|HORVU2Hr1G091290|HORVU4Hr1G087670|HORVU5Hr1G124880|HORVU5Hr1G124770|HORVU6Hr1G016100|HORVU2Hr1G091230|HORVU4Hr1G087960|HORVU5Hr1G094430|HORVU5Hr1G094410|HORVU4Hr1G088060|HORVU4Hr1G088390|HORVU4Hr1G087350|HORVU7Hr1G101390|HORVU7Hr1G103510|HORVU6Hr1G064140|HORVU7Hr1G101310|HORVU6Hr1G064430|HORVU6Hr1G064220|HORVU6Hr1G064010	1	http://amigo.geneontology.org/amigo/term/GO:0051179
biological_process	protein metabolic process	GO:0019538	35	4813	1.04	0.78	HORVU2Hr1G091290|HORVU2Hr1G002840|HORVU4Hr1G088660|HORVU6Hr1G063860|HORVU5Hr1G124810|HORVU4Hr1G087850|HORVU2Hr1G002660|HORVU5Hr1G094510|HORVU2Hr1G091090|HORVU7Hr1G103330|HORVU6Hr1G064070|HORVU6Hr1G064150|HORVU6Hr1G064110|HORVU6Hr1G064450|HORVU6Hr1G064230|HORVU6Hr1G064130|HORVU2Hr1G002830|HORVU4Hr1G087060|HORVU4Hr1G087880|HORVU4Hr1G088650|HORVU2Hr1G002750|HORVU6Hr1G063910|HORVU4Hr1G088530|HORVU2Hr…	1	http://amigo.geneontology.org/amigo/term/GO:0019538
biological_process	organic acid catabolic process	GO:0016054	1	138	1.04	0.621	HORVU4Hr1G087680	1	http://amigo.geneontology.org/amigo/term/GO:0016054
biological_process	mitochondrion organization	GO:0007005	1	138	1.04	0.621	HORVU6Hr1G015900	1	http://amigo.geneontology.org/amigo/term/GO:0007005
biological_process	biological regulation	GO:0065007	33	4562	1.04	0.849	HORVU2Hr1G002750|HORVU2Hr1G002840|HORVU2Hr1G091360|HORVU4Hr1G087060|HORVU4Hr1G087340|HORVU4Hr1G087360|HORVU4Hr1G087400|HORVU4Hr1G087430|HORVU4Hr1G087520|HORVU4Hr1G087580|HORVU4Hr1G087590|HORVU4Hr1G087610|HORVU4Hr1G087700|HORVU4Hr1G088010|HORVU4Hr1G088210|HORVU4Hr1G088280|HORVU4Hr1G088690|HORVU5Hr1G124670|HORVU5Hr1G124750|HORVU5Hr1G124940|HORVU5Hr1G125050|HORVU5Hr1G125110|HORVU6Hr1G015670|HORVU6Hr…	1	http://amigo.geneontology.org/amigo/term/GO:0065007
biological_process	establishment of localization	GO:0051234	19	2639	1.03	0.903	HORVU4Hr1G088020|HORVU4Hr1G087670|HORVU5Hr1G124880|HORVU5Hr1G124770|HORVU6Hr1G016100|HORVU2Hr1G091230|HORVU4Hr1G087960|HORVU5Hr1G094430|HORVU5Hr1G094410|HORVU4Hr1G088060|HORVU4Hr1G088390|HORVU4Hr1G087350|HORVU7Hr1G101390|HORVU7Hr1G103510|HORVU6Hr1G064140|HORVU7Hr1G101310|HORVU6Hr1G064430|HORVU6Hr1G064220|HORVU6Hr1G064010	1	http://amigo.geneontology.org/amigo/term/GO:0051234
biological_process	DNA repair	GO:0006281	3	417	1.03	0.769	HORVU7Hr1G103800|HORVU7Hr1G101690|HORVU4Hr1G088690	1	http://amigo.geneontology.org/amigo/term/GO:0006281
biological_process	establishment of localization in cell	GO:0051649	5	696	1.03	0.818	HORVU7Hr1G101390|HORVU5Hr1G124770|HORVU6Hr1G016100|HORVU5Hr1G094410|HORVU4Hr1G088390	1	http://amigo.geneontology.org/amigo/term/GO:0051649
biological_process	protein-containing complex assembly	GO:0065003	4	560	1.02	0.799	HORVU6Hr1G063900|HORVU5Hr1G094500|HORVU6Hr1G015900|HORVU4Hr1G088690	1	http://amigo.geneontology.org/amigo/term/GO:0065003
biological_process	organelle organization	GO:0006996	9	1267	1.02	0.864	HORVU4Hr1G087740|HORVU5Hr1G094540|HORVU7Hr1G103800|HORVU5Hr1G094410|HORVU4Hr1G087200|HORVU6Hr1G063900|HORVU5Hr1G094500|HORVU6Hr1G015900|HORVU7Hr1G101690	1	http://amigo.geneontology.org/amigo/term/GO:0006996
biological_process	developmental process involved in reproduction	GO:0003006	1	141	1.01	0.629	HORVU4Hr1G087200	1	http://amigo.geneontology.org/amigo/term/GO:0003006
biological_process	response to abiotic stimulus	GO:0009628	3	425	1.01	0.773	HORVU6Hr1G064620|HORVU6Hr1G063810|HORVU4Hr1G088610	1	http://amigo.geneontology.org/amigo/term/GO:0009628
biological_process	organonitrogen compound metabolic process	GO:1901564	41	5855	1	1	HORVU2Hr1G002660|HORVU2Hr1G002690|HORVU2Hr1G002750|HORVU2Hr1G002830|HORVU2Hr1G002840|HORVU2Hr1G091090|HORVU2Hr1G091220|HORVU2Hr1G091290|HORVU2Hr1G091360|HORVU4Hr1G087060|HORVU4Hr1G087100|HORVU4Hr1G087110|HORVU4Hr1G087120|HORVU4Hr1G087720|HORVU4Hr1G087850|HORVU4Hr1G087880|HORVU4Hr1G088090|HORVU4Hr1G088440|HORVU4Hr1G088470|HORVU4Hr1G088530|HORVU4Hr1G088650|HORVU4Hr1G088660|HORVU4Hr1G088690|HORVU5Hr…	1	http://amigo.geneontology.org/amigo/term/GO:1901564
biological_process	cellular response to stimulus	GO:0051716	14	2007	1	1	HORVU2Hr1G002840|HORVU4Hr1G087060|HORVU2Hr1G002750|HORVU2Hr1G091360|HORVU6Hr1G063810|HORVU4Hr1G088610|HORVU6Hr1G063830|HORVU6Hr1G016230|HORVU7Hr1G103800|HORVU4Hr1G088690|HORVU7Hr1G101270|HORVU6Hr1G064370|HORVU2Hr1G091220|HORVU7Hr1G101690	1	http://amigo.geneontology.org/amigo/term/GO:0051716
biological_process	protein localization to membrane	GO:0072657	1	144	0.99	1	HORVU2Hr1G091290	1	http://amigo.geneontology.org/amigo/term/GO:0072657
biological_process	cellular protein metabolic process	GO:0044267	30	4327	0.99	1	HORVU2Hr1G002660|HORVU2Hr1G002690|HORVU2Hr1G002750|HORVU2Hr1G002830|HORVU2Hr1G002840|HORVU2Hr1G091090|HORVU2Hr1G091220|HORVU2Hr1G091290|HORVU2Hr1G091360|HORVU4Hr1G087060|HORVU4Hr1G087120|HORVU4Hr1G087720|HORVU4Hr1G087850|HORVU4Hr1G087880|HORVU4Hr1G088090|HORVU4Hr1G088650|HORVU4Hr1G088660|HORVU4Hr1G088690|HORVU5Hr1G094510|HORVU5Hr1G124800|HORVU5Hr1G124810|HORVU6Hr1G016120|HORVU6Hr1G016200|HORVU6Hr…	1	http://amigo.geneontology.org/amigo/term/GO:0044267
biological_process	histone modification	GO:0016570	1	145	0.99	1	HORVU7Hr1G103420	1	http://amigo.geneontology.org/amigo/term/GO:0016570
biological_process	ribonucleotide biosynthetic process	GO:0009260	1	147	0.97	1	HORVU4Hr1G088440	1	http://amigo.geneontology.org/amigo/term/GO:0009260
biological_process	macromolecule metabolic process	GO:0043170	49	7244	0.97	0.874	HORVU2Hr1G002660|HORVU2Hr1G002690|HORVU2Hr1G002750|HORVU2Hr1G002830|HORVU2Hr1G002840|HORVU2Hr1G002880|HORVU2Hr1G002930|HORVU2Hr1G091090|HORVU2Hr1G091220|HORVU2Hr1G091270|HORVU2Hr1G091290|HORVU2Hr1G091360|HORVU2Hr1G091370|HORVU4Hr1G087060|HORVU4Hr1G087120|HORVU4Hr1G087200|HORVU4Hr1G087720|HORVU4Hr1G087850|HORVU4Hr1G087880|HORVU4Hr1G087990|HORVU4Hr1G088090|HORVU4Hr1G088210|HORVU4Hr1G088470|HORVU4Hr…	1	http://amigo.geneontology.org/amigo/term/GO:0043170
biological_process	response to light stimulus	GO:0009416	1	148	0.97	1	HORVU4Hr1G088610	1	http://amigo.geneontology.org/amigo/term/GO:0009416
biological_process	phosphorelay signal transduction system	GO:0000160	1	148	0.97	1	HORVU6Hr1G064370	1	http://amigo.geneontology.org/amigo/term/GO:0000160
biological_process	cell communication	GO:0007154	8	1185	0.97	1	HORVU2Hr1G002830|HORVU2Hr1G002840|HORVU7Hr1G101270|HORVU4Hr1G087060|HORVU2Hr1G002750|HORVU2Hr1G091360|HORVU6Hr1G064370|HORVU4Hr1G088090	1	http://amigo.geneontology.org/amigo/term/GO:0007154
biological_process	ribose phosphate biosynthetic process	GO:0046390	1	150	0.95	1	HORVU4Hr1G088440	1	http://amigo.geneontology.org/amigo/term/GO:0046390
biological_process	cellular response to chemical stimulus	GO:0070887	5	752	0.95	1	HORVU7Hr1G101270|HORVU4Hr1G088610|HORVU6Hr1G063830|HORVU6Hr1G064370|HORVU2Hr1G091220	1	http://amigo.geneontology.org/amigo/term/GO:0070887
biological_process	cellular component assembly	GO:0022607	5	754	0.95	1	HORVU5Hr1G094540|HORVU6Hr1G063900|HORVU5Hr1G094500|HORVU6Hr1G015900|HORVU4Hr1G088690	1	http://amigo.geneontology.org/amigo/term/GO:0022607
biological_process	small molecule metabolic process	GO:0044281	10	1513	0.95	1	HORVU4Hr1G087680|HORVU4Hr1G088440|HORVU5Hr1G094580|HORVU5Hr1G124820|HORVU4Hr1G087100|HORVU2Hr1G091200|HORVU4Hr1G087110|HORVU4Hr1G087230|HORVU2Hr1G003110|HORVU6Hr1G016280HORVU5Hr1G094540|	1	http://amigo.geneontology.org/amigo/term/GO:0044281
biological_process	cellular macromolecule metabolic process	GO:0044260	38	5761	0.94	0.795	HORVU2Hr1G002660|HORVU2Hr1G002690|HORVU2Hr1G002750|HORVU2Hr1G002830|HORVU2Hr1G002840|HORVU2Hr1G091090|HORVU2Hr1G091220|HORVU2Hr1G091270|HORVU2Hr1G091290|HORVU2Hr1G091360|HORVU4Hr1G087060|HORVU4Hr1G087120|HORVU4Hr1G087720|HORVU4Hr1G087850|HORVU4Hr1G087880|HORVU4Hr1G087990|HORVU4Hr1G088090|HORVU4Hr1G088210|HORVU4Hr1G088650|HORVU4Hr1G088660|HORVU4Hr1G088690|HORVU5Hr1G094510|HORVU5Hr1G094580|HORVU5Hr…	1	http://amigo.geneontology.org/amigo/term/GO:0044260
biological_process	RNA modification	GO:0009451	2	306	0.94	1	HORVU5Hr1G094580|HORVU2Hr1G091370	1	http://amigo.geneontology.org/amigo/term/GO:0009451
biological_process	ion transport	GO:0006811	5	770	0.93	1	HORVU4Hr1G088020|HORVU4Hr1G087960|HORVU5Hr1G094430|HORVU4Hr1G087350|HORVU6Hr1G064010	1	http://amigo.geneontology.org/amigo/term/GO:0006811
biological_process	multicellular organismal process	GO:0032501	3	463	0.93	1	HORVU2Hr1G002830|HORVU4Hr1G088090|HORVU4Hr1G087200	1	http://amigo.geneontology.org/amigo/term/GO:0032501
biological_process	nitrogen compound metabolic process	GO:0006807	50	7744	0.92	0.589	HORVU2Hr1G002660|HORVU2Hr1G002690|HORVU2Hr1G002750|HORVU2Hr1G002830|HORVU2Hr1G002840|HORVU2Hr1G003110|HORVU2Hr1G091090|HORVU2Hr1G091220|HORVU2Hr1G091290|HORVU2Hr1G091360|HORVU2Hr1G091370|HORVU4Hr1G087060|HORVU4Hr1G087100|HORVU4Hr1G087110|HORVU4Hr1G087120|HORVU4Hr1G087200|HORVU4Hr1G087230|HORVU4Hr1G087720|HORVU4Hr1G087850|HORVU4Hr1G087880|HORVU4Hr1G088090|HORVU4Hr1G088210|HORVU4Hr1G088440|HORVU4Hr…	1	http://amigo.geneontology.org/amigo/term/GO:0006807
biological_process	nucleobase-containing compound transport	GO:0015931	1	155	0.92	1	HORVU7Hr1G101390	1	http://amigo.geneontology.org/amigo/term/GO:0015931
biological_process	response to oxidative stress	GO:0006979	2	311	0.92	1	HORVU4Hr1G088610|HORVU6Hr1G063830	1	http://amigo.geneontology.org/amigo/term/GO:0006979
biological_process	response to lipid	GO:0033993	1	156	0.92	1	HORVU6Hr1G064620	1	http://amigo.geneontology.org/amigo/term/GO:0033993
biological_process	hormone-mediated signaling pathway	GO:0009755	2	313	0.91	1	HORVU7Hr1G101270|HORVU6Hr1G064370	1	http://amigo.geneontology.org/amigo/term/GO:0009755
biological_process	response to radiation	GO:0009314	1	157	0.91	1	HORVU4Hr1G088610	1	http://amigo.geneontology.org/amigo/term/GO:0009314
biological_process	cellular response to hormone stimulus	GO:0032870	2	315	0.91	1	HORVU7Hr1G101270|HORVU6Hr1G064370	1	http://amigo.geneontology.org/amigo/term/GO:0032870
biological_process	cellular process	GO:0009987	85	13428	0.91	0.265	HORVU2Hr1G002660|HORVU2Hr1G002690|HORVU2Hr1G002750|HORVU2Hr1G002830|HORVU2Hr1G002840|HORVU2Hr1G003110|HORVU2Hr1G091090|HORVU2Hr1G091220|HORVU2Hr1G091230|HORVU2Hr1G091270|HORVU2Hr1G091290|HORVU2Hr1G091360|HORVU2Hr1G091370|HORVU4Hr1G087060|HORVU4Hr1G087100|HORVU4Hr1G087110|HORVU4Hr1G087120|HORVU4Hr1G087200|HORVU4Hr1G087230|HORVU4Hr1G087630|HORVU4Hr1G087670|HORVU4Hr1G087680|HORVU4Hr1G087720|HORVU4Hr…	1	http://amigo.geneontology.org/amigo/term/GO:0009987
biological_process	cellular response to endogenous stimulus	GO:0071495	2	316	0.91	1	HORVU7Hr1G101270|HORVU6Hr1G064370	1	http://amigo.geneontology.org/amigo/term/GO:0071495
biological_process	sulfur compound metabolic process	GO:0006790	2	320	0.89	1	HORVU5Hr1G124820|HORVU4Hr1G087110	1	http://amigo.geneontology.org/amigo/term/GO:0006790
biological_process	cation transmembrane transport	GO:0098655	3	481	0.89	1	HORVU4Hr1G087960|HORVU5Hr1G094430|HORVU6Hr1G064010	1	http://amigo.geneontology.org/amigo/term/GO:0098655
biological_process	protein-containing complex subunit organization	GO:0043933	4	642	0.89	1	HORVU6Hr1G063900|HORVU5Hr1G094500|HORVU6Hr1G015900|HORVU4Hr1G088690	1	http://amigo.geneontology.org/amigo/term/GO:0043933
biological_process	methylation	GO:0032259	2	321	0.89	1	HORVU7Hr1G103420|HORVU5Hr1G094580	1	http://amigo.geneontology.org/amigo/term/GO:0032259
biological_process	organic substance metabolic process	GO:0071704	61	9888	0.88	0.287	HORVU2Hr1G002640|HORVU2Hr1G002660|HORVU2Hr1G002690|HORVU2Hr1G002750|HORVU2Hr1G002830|HORVU2Hr1G002840|HORVU2Hr1G002880|HORVU2Hr1G002930|HORVU2Hr1G003110|HORVU2Hr1G091090|HORVU2Hr1G091200|HORVU2Hr1G091220|HORVU2Hr1G091270|HORVU2Hr1G091290|HORVU2Hr1G091360|HORVU2Hr1G091370|HORVU4Hr1G087060|HORVU4Hr1G087100|HORVU4Hr1G087110|HORVU4Hr1G087120|HORVU4Hr1G087200|HORVU4Hr1G087230|HORVU4Hr1G087630|HORVU4Hr…	1	http://amigo.geneontology.org/amigo/term/GO:0071704
biological_process	primary metabolic process	GO:0044238	57	9299	0.88	0.277	HORVU2Hr1G002660|HORVU2Hr1G002690|HORVU2Hr1G002750|HORVU2Hr1G002830|HORVU2Hr1G002840|HORVU2Hr1G002880|HORVU2Hr1G002930|HORVU2Hr1G003110|HORVU2Hr1G091090|HORVU2Hr1G091220|HORVU2Hr1G091270|HORVU2Hr1G091290|HORVU2Hr1G091360|HORVU2Hr1G091370|HORVU4Hr1G087060|HORVU4Hr1G087100|HORVU4Hr1G087110|HORVU4Hr1G087120|HORVU4Hr1G087200|HORVU4Hr1G087230|HORVU4Hr1G087680|HORVU4Hr1G087720|HORVU4Hr1G087850|HORVU4Hr…	1	http://amigo.geneontology.org/amigo/term/GO:0044238
biological_process	metabolic process	GO:0008152	67	10974	0.87	0.191	HORVU2Hr1G002640|HORVU2Hr1G002660|HORVU2Hr1G002690|HORVU2Hr1G002750|HORVU2Hr1G002830|HORVU2Hr1G002840|HORVU2Hr1G002880|HORVU2Hr1G002930|HORVU2Hr1G003110|HORVU2Hr1G091090|HORVU2Hr1G091200|HORVU2Hr1G091270|HORVU2Hr1G091290|HORVU2Hr1G091360|HORVU2Hr1G091370|HORVU4Hr1G087060|HORVU4Hr1G087100|HORVU4Hr1G087110|HORVU4Hr1G087120|HORVU4Hr1G087200|HORVU4Hr1G087230|HORVU4Hr1G087630|HORVU4Hr1G087680|HORVU4Hr…	1	http://amigo.geneontology.org/amigo/term/GO:0008152
biological_process	transcription, DNA-templated	GO:0006351	2	328	0.87	1	HORVU5Hr1G125110|HORVU4Hr1G088690	1	http://amigo.geneontology.org/amigo/term/GO:0006351
biological_process	lipid catabolic process	GO:0016042	1	164	0.87	1	HORVU4Hr1G087680	1	http://amigo.geneontology.org/amigo/term/GO:0016042
biological_process	ncRNA metabolic process	GO:0034660	3	496	0.87	1	HORVU5Hr1G094580|HORVU2Hr1G091370|HORVU6Hr1G016260	1	http://amigo.geneontology.org/amigo/term/GO:0034660
biological_process	localization within membrane	GO:0051668	1	166	0.86	1	HORVU2Hr1G091290	1	http://amigo.geneontology.org/amigo/term/GO:0051668
biological_process	lipid metabolic process	GO:0006629	6	997	0.86	1	HORVU2Hr1G091290|HORVU4Hr1G087680|HORVU5Hr1G124820|HORVU4Hr1G087110|HORVU6Hr1G016280|HORVU4Hr1G088470	1	http://amigo.geneontology.org/amigo/term/GO:0006629
biological_process	cellular metabolic process	GO:0044237	57	9529	0.86	0.196	HORVU2Hr1G002660|HORVU2Hr1G002690|HORVU2Hr1G002750|HORVU2Hr1G002830|HORVU2Hr1G002840|HORVU2Hr1G003110|HORVU2Hr1G091090|HORVU2Hr1G091220|HORVU2Hr1G091270|HORVU2Hr1G091290|HORVU2Hr1G091360|HORVU2Hr1G091370|HORVU4Hr1G087060|HORVU4Hr1G087100|HORVU4Hr1G087110|HORVU4Hr1G087120|HORVU4Hr1G087200|HORVU4Hr1G087230|HORVU4Hr1G087630|HORVU4Hr1G087680|HORVU4Hr1G087720|HORVU4Hr1G087850|HORVU4Hr1G087880|HORVU4Hr…	1	http://amigo.geneontology.org/amigo/term/GO:0044237
biological_process	nucleic acid-templated transcription	GO:0097659	2	337	0.85	1	HORVU5Hr1G125110|HORVU4Hr1G088690	1	http://amigo.geneontology.org/amigo/term/GO:0097659
biological_process	transmembrane transport	GO:0055085	9	1523	0.85	0.753	HORVU4Hr1G088020|HORVU4Hr1G087670|HORVU5Hr1G124880|HORVU4Hr1G087960|HORVU6Hr1G064140|HORVU5Hr1G094430|HORVU6Hr1G064430|HORVU6Hr1G064220|HORVU6Hr1G064010	1	http://amigo.geneontology.org/amigo/term/GO:0055085
biological_process	cellular lipid metabolic process	GO:0044255	4	683	0.84	1	HORVU2Hr1G091290|HORVU4Hr1G087680|HORVU6Hr1G016280|HORVU4Hr1G088470	1	http://amigo.geneontology.org/amigo/term/GO:0044255
biological_process	signal transduction	GO:0007165	6	1025	0.84	0.849	HORVU2Hr1G002840|HORVU7Hr1G101270|HORVU4Hr1G087060|HORVU2Hr1G002750|HORVU2Hr1G091360|HORVU6Hr1G064370	1	http://amigo.geneontology.org/amigo/term/GO:0007165
biological_process	cellular component biogenesis	GO:0044085	7	1198	0.84	0.859	HORVU5Hr1G124770|HORVU5Hr1G094540|HORVU6Hr1G063900|HORVU5Hr1G094500|HORVU6Hr1G015900|HORVU6Hr1G016260|HORVU4Hr1G088690	1	http://amigo.geneontology.org/amigo/term/GO:0044085
biological_process	RNA biosynthetic process	GO:0032774	2	344	0.83	1	HORVU5Hr1G125110|HORVU4Hr1G088690	1	http://amigo.geneontology.org/amigo/term/GO:0032774
biological_process	cation transport	GO:0006812	3	518	0.83	1	HORVU4Hr1G087960|HORVU5Hr1G094430|HORVU6Hr1G064010	1	http://amigo.geneontology.org/amigo/term/GO:0006812
biological_process	signaling	GO:0023052	6	1036	0.83	0.849	HORVU2Hr1G002840|HORVU7Hr1G101270|HORVU4Hr1G087060|HORVU2Hr1G002750|HORVU2Hr1G091360|HORVU6Hr1G064370	1	http://amigo.geneontology.org/amigo/term/GO:0023052
biological_process	aromatic compound biosynthetic process	GO:0019438	5	866	0.83	0.837	HORVU4Hr1G088440|HORVU5Hr1G124820|HORVU5Hr1G125110|HORVU4Hr1G087110|HORVU4Hr1G088690	1	http://amigo.geneontology.org/amigo/term/GO:0019438
biological_process	DNA metabolic process	GO:0006259	3	522	0.82	1	HORVU7Hr1G103800|HORVU7Hr1G101690|HORVU4Hr1G088690	1	http://amigo.geneontology.org/amigo/term/GO:0006259
biological_process	response to auxin	GO:0009733	1	176	0.81	1	HORVU7Hr1G101270	1	http://amigo.geneontology.org/amigo/term/GO:0009733
biological_process	detoxification	GO:0098754	2	352	0.81	1	HORVU5Hr1G124880|HORVU6Hr1G063830	1	http://amigo.geneontology.org/amigo/term/GO:0098754
biological_process	cellular aromatic compound metabolic process	GO:0006725	16	2818	0.81	0.478	HORVU5Hr1G124750|HORVU4Hr1G088440|HORVU4Hr1G088210|HORVU2Hr1G091370|HORVU5Hr1G124820|HORVU4Hr1G087630|HORVU7Hr1G103800|HORVU4Hr1G087200|HORVU5Hr1G125110|HORVU4Hr1G087110|HORVU6Hr1G016260|HORVU4Hr1G087230|HORVU2Hr1G003110|HORVU4Hr1G088690|HORVU5Hr1G094580|HORVU7Hr1G101690	1	http://amigo.geneontology.org/amigo/term/GO:0006725
biological_process	nucleobase-containing compound metabolic process	GO:0006139	14	2478	0.81	0.53	HORVU4Hr1G088440|HORVU4Hr1G088210|HORVU2Hr1G091370|HORVU5Hr1G124820|HORVU7Hr1G103800|HORVU4Hr1G087200|HORVU5Hr1G125110|HORVU4Hr1G087110|HORVU6Hr1G016260|HORVU4Hr1G087230|HORVU2Hr1G003110|HORVU4Hr1G088690|HORVU5Hr1G094580|HORVU7Hr1G101690	1	http://amigo.geneontology.org/amigo/term/GO:0006139
biological_process	heterocycle metabolic process	GO:0046483	15	2704	0.79	0.401	HORVU5Hr1G124750|HORVU4Hr1G088440|HORVU4Hr1G088210|HORVU2Hr1G091370|HORVU5Hr1G124820|HORVU7Hr1G103800|HORVU4Hr1G087200|HORVU5Hr1G125110|HORVU4Hr1G087110|HORVU6Hr1G016260|HORVU4Hr1G087230|HORVU2Hr1G003110|HORVU4Hr1G088690|HORVU5Hr1G094580|HORVU7Hr1G101690	1	http://amigo.geneontology.org/amigo/term/GO:0046483
biological_process	organelle assembly	GO:0070925	1	187	0.77	1	HORVU5Hr1G094540	1	http://amigo.geneontology.org/amigo/term/GO:0070925
biological_process	regulation of catalytic activity	GO:0050790	3	562	0.76	1	HORVU7Hr1G101390|HORVU7Hr1G103510|HORVU5Hr1G124670	1	http://amigo.geneontology.org/amigo/term/GO:0050790
biological_process	regulation of hydrolase activity	GO:0051336	1	188	0.76	1	HORVU5Hr1G124670	1	http://amigo.geneontology.org/amigo/term/GO:0051336
biological_process	regulation of molecular function	GO:0065009	3	568	0.76	1	HORVU7Hr1G101390|HORVU7Hr1G103510|HORVU5Hr1G124670	1	http://amigo.geneontology.org/amigo/term/GO:0065009
biological_process	response to toxic substance	GO:0009636	2	379	0.76	1	HORVU5Hr1G124880|HORVU6Hr1G063830	1	http://amigo.geneontology.org/amigo/term/GO:0009636
biological_process	cellular carbohydrate metabolic process	GO:0044262	2	380	0.75	1	HORVU2Hr1G091270|HORVU4Hr1G087990	1	http://amigo.geneontology.org/amigo/term/GO:0044262
biological_process	regulation of response to stimulus	GO:0048583	1	191	0.75	1	HORVU4Hr1G087520	1	http://amigo.geneontology.org/amigo/term/GO:0048583
biological_process	cellular component organization or biogenesis	GO:0071840	12	2308	0.74	0.364	HORVU5Hr1G124770|HORVU4Hr1G087740|HORVU5Hr1G094540|HORVU7Hr1G103800|HORVU5Hr1G094410|HORVU4Hr1G087200|HORVU6Hr1G063900|HORVU5Hr1G094500|HORVU6Hr1G015900|HORVU6Hr1G016260|HORVU7Hr1G101690|HORVU4Hr1G088690	1	http://amigo.geneontology.org/amigo/term/GO:0071840
biological_process	organic cyclic compound biosynthetic process	GO:1901362	5	968	0.74	0.693	HORVU4Hr1G088440|HORVU5Hr1G124820|HORVU5Hr1G125110|HORVU4Hr1G087110|HORVU4Hr1G088690	1	http://amigo.geneontology.org/amigo/term/GO:1901362
biological_process	organic cyclic compound metabolic process	GO:1901360	15	2904	0.74	0.246	HORVU4Hr1G088440|HORVU4Hr1G088210|HORVU2Hr1G091370|HORVU5Hr1G124820|HORVU4Hr1G087630|HORVU7Hr1G103800|HORVU4Hr1G087200|HORVU5Hr1G125110|HORVU4Hr1G087110|HORVU6Hr1G016260|HORVU4Hr1G087230|HORVU2Hr1G003110|HORVU4Hr1G088690|HORVU5Hr1G094580|HORVU7Hr1G101690	1	http://amigo.geneontology.org/amigo/term/GO:1901360
biological_process	cellular component organization	GO:0016043	10	1944	0.74	0.399	HORVU4Hr1G087740|HORVU5Hr1G094540|HORVU7Hr1G103800|HORVU5Hr1G094410|HORVU4Hr1G087200|HORVU6Hr1G063900|HORVU5Hr1G094500|HORVU6Hr1G015900|HORVU7Hr1G101690|HORVU4Hr1G088690	1	http://amigo.geneontology.org/amigo/term/GO:0016043
biological_process	intracellular signal transduction	GO:0035556	2	391	0.73	1	HORVU4Hr1G087060|HORVU6Hr1G064370	1	http://amigo.geneontology.org/amigo/term/GO:0035556
biological_process	cell cycle	GO:0007049	2	391	0.73	1	HORVU4Hr1G087740|HORVU4Hr1G087200	1	http://amigo.geneontology.org/amigo/term/GO:0007049
biological_process	nucleotide biosynthetic process	GO:0009165	1	196	0.73	1	HORVU4Hr1G088440	1	http://amigo.geneontology.org/amigo/term/GO:0009165
biological_process	cellular amino acid biosynthetic process	GO:0008652	1	196	0.73	1	HORVU4Hr1G087100	1	http://amigo.geneontology.org/amigo/term/GO:0008652
biological_process	monocarboxylic acid metabolic process	GO:0032787	2	398	0.72	1	HORVU4Hr1G087680|HORVU6Hr1G016280	1	http://amigo.geneontology.org/amigo/term/GO:0032787
biological_process	nucleoside phosphate biosynthetic process	GO:1901293	1	199	0.72	1	HORVU4Hr1G088440	1	http://amigo.geneontology.org/amigo/term/GO:1901293
biological_process	microtubule-based process	GO:0007017	1	199	0.72	1	HORVU4Hr1G087740	1	http://amigo.geneontology.org/amigo/term/GO:0007017
biological_process	ribosome biogenesis	GO:0042254	2	400	0.72	1	HORVU5Hr1G124770|HORVU6Hr1G016260	1	http://amigo.geneontology.org/amigo/term/GO:0042254
biological_process	carbohydrate metabolic process	GO:0005975	5	1039	0.69	0.567	HORVU2Hr1G091270|HORVU4Hr1G087990|HORVU2Hr1G002930|HORVU6Hr1G015670|HORVU2Hr1G002880	1	http://amigo.geneontology.org/amigo/term/GO:0005975
biological_process	cellular glucan metabolic process	GO:0006073	1	213	0.67	1	HORVU4Hr1G087990	1	http://amigo.geneontology.org/amigo/term/GO:0006073
biological_process	carbohydrate derivative biosynthetic process	GO:1901137	2	427	0.67	1	HORVU2Hr1G091290|HORVU4Hr1G088440	1	http://amigo.geneontology.org/amigo/term/GO:1901137
biological_process	small molecule catabolic process	GO:0044282	1	216	0.66	1	HORVU4Hr1G087680	1	http://amigo.geneontology.org/amigo/term/GO:0044282
biological_process	cytoskeleton organization	GO:0007010	1	216	0.66	1	HORVU4Hr1G087740	1	http://amigo.geneontology.org/amigo/term/GO:0007010
biological_process	ion transmembrane transport	GO:0034220	3	651	0.66	0.635	HORVU4Hr1G087960|HORVU5Hr1G094430|HORVU6Hr1G064010	1	http://amigo.geneontology.org/amigo/term/GO:0034220
biological_process	nucleobase-containing compound biosynthetic process	GO:0034654	3	652	0.66	0.635	HORVU4Hr1G088440|HORVU5Hr1G125110|HORVU4Hr1G088690	1	http://amigo.geneontology.org/amigo/term/GO:0034654
biological_process	nucleic acid metabolic process	GO:0090304	9	2028	0.64	0.213	HORVU4Hr1G088210|HORVU5Hr1G094580|HORVU2Hr1G091370|HORVU7Hr1G103800|HORVU4Hr1G087200|HORVU5Hr1G125110|HORVU6Hr1G016260|HORVU7Hr1G101690|HORVU4Hr1G088690	1	http://amigo.geneontology.org/amigo/term/GO:0090304
biological_process	glucan metabolic process	GO:0044042	1	226	0.63	1	HORVU4Hr1G087990	1	http://amigo.geneontology.org/amigo/term/GO:0044042
biological_process	mitotic cell cycle	GO:0000278	1	229	0.62	1	HORVU4Hr1G087740	1	http://amigo.geneontology.org/amigo/term/GO:0000278
biological_process	cellular nitrogen compound metabolic process	GO:0034641	15	3450	0.62	0.0522	HORVU4Hr1G088440|HORVU4Hr1G088210|HORVU4Hr1G087880|HORVU2Hr1G091370|HORVU5Hr1G124820|HORVU4Hr1G087630|HORVU7Hr1G103800|HORVU4Hr1G087200|HORVU5Hr1G125110|HORVU4Hr1G087110|HORVU6Hr1G016260|HORVU4Hr1G087230|HORVU2Hr1G003110|HORVU4Hr1G088690|HORVU5Hr1G094580|HORVU7Hr1G101690	1	http://amigo.geneontology.org/amigo/term/GO:0034641
biological_process	protein folding	GO:0006457	1	234	0.61	1	HORVU6Hr1G016080	1	http://amigo.geneontology.org/amigo/term/GO:0006457
biological_process	gene expression	GO:0010467	8	1925	0.59	0.157	HORVU4Hr1G087880|HORVU5Hr1G094580|HORVU2Hr1G091370|HORVU4Hr1G087850|HORVU5Hr1G125110|HORVU6Hr1G016260|HORVU6Hr1G064230|HORVU4Hr1G088690|HORVU4Hr1G088470	1	http://amigo.geneontology.org/amigo/term/GO:0010467
biological_process	RNA metabolic process	GO:0016070	6	1485	0.58	0.201	HORVU4Hr1G088210|HORVU5Hr1G094580|HORVU2Hr1G091370|HORVU5Hr1G125110|HORVU6Hr1G016260|HORVU4Hr1G088690	1	http://amigo.geneontology.org/amigo/term/GO:0016070
biological_process	ribonucleoprotein complex biogenesis	GO:0022613	2	504	0.57	0.592	HORVU5Hr1G124770|HORVU6Hr1G01626	1	http://amigo.geneontology.org/amigo/term/GO:0022613
biological_process	regulation of biological quality	GO:0065008	2	506	0.57	0.592	HORVU5Hr1G124750|HORVU4Hr1G088210	1	http://amigo.geneontology.org/amigo/term/GO:0065008
biological_process	developmental process	GO:0032502	2	517	0.55	0.592	HORVU4Hr1G087200|HORVU4Hr1G088280	1	http://amigo.geneontology.org/amigo/term/GO:0032502
biological_process	rRNA processing	GO:0006364	1	264	0.54	1	HORVU6Hr1G016260	1	http://amigo.geneontology.org/amigo/term/GO:0006364
biological_process	RNA processing	GO:0006396	3	800	0.54	0.386	HORVU5Hr1G094580|HORVU2Hr1G091370|HORVU6Hr1G016260	1	http://amigo.geneontology.org/amigo/term/GO:0006396
biological_process	positive regulation of biological process	GO:0048518	2	535	0.53	0.595	HORVU4Hr1G088210|HORVU5Hr1G124940	1	http://amigo.geneontology.org/amigo/term/GO:0048518
biological_process	lipid biosynthetic process	GO:0008610	2	542	0.53	0.597	HORVU2Hr1G091290|HORVU4Hr1G088470	1	http://amigo.geneontology.org/amigo/term/GO:0008610
biological_process	rRNA metabolic process	GO:0016072	1	272	0.53	1	HORVU6Hr1G016260	1	http://amigo.geneontology.org/amigo/term/GO:0016072
biological_process	heterocycle biosynthetic process	GO:0018130	3	820	0.52	0.389	HORVU4Hr1G088440|HORVU5Hr1G125110|HORVU4Hr1G088690	1	http://amigo.geneontology.org/amigo/term/GO:0018130
biological_process	biosynthetic process	GO:0009058	11	3104	0.51	0.0127	HORVU2Hr1G091290|HORVU5Hr1G124750|HORVU4Hr1G088440|HORVU4Hr1G087880|HORVU2Hr1G002640|HORVU5Hr1G124820|HORVU4Hr1G087850|HORVU4Hr1G087100|HORVU5Hr1G125110|HORVU4Hr1G087110|HORVU4Hr1G088690|HORVU4Hr1G088470	1	http://amigo.geneontology.org/amigo/term/GO:0009058
biological_process	cellular oxidant detoxification	GO:0098869	1	286	0.5	0.727	HORVU6Hr1G063830	1	http://amigo.geneontology.org/amigo/term/GO:0098869
biological_process	cellular biosynthetic process	GO:0044249	10	2875	0.5	0.0185	HORVU2Hr1G091290|HORVU5Hr1G124750|HORVU4Hr1G088440|HORVU4Hr1G087880|HORVU5Hr1G124820|HORVU4Hr1G087850|HORVU4Hr1G087100|HORVU5Hr1G125110|HORVU4Hr1G087110|HORVU4Hr1G088690|HORVU4Hr1G088470	1	http://amigo.geneontology.org/amigo/term/GO:0044249
biological_process	carboxylic acid metabolic process	GO:0019752	3	868	0.49	0.297	HORVU4Hr1G087680|HORVU4Hr1G087100|HORVU6Hr1G016280	1	http://amigo.geneontology.org/amigo/term/GO:0019752
biological_process	oxoacid metabolic process	GO:0043436	3	873	0.49	0.298	HORVU4Hr1G087680|HORVU4Hr1G087100|HORVU6Hr1G016280	1	http://amigo.geneontology.org/amigo/term/GO:0043436
biological_process	photosynthesis	GO:0015979	1	291	0.49	0.727	HORVU6Hr1G015640	1	http://amigo.geneontology.org/amigo/term/GO:0015979
biological_process	organic substance biosynthetic process	GO:1901576	10	2964	0.48	0.0108	HORVU2Hr1G091290|HORVU4Hr1G088440|HORVU4Hr1G087880|HORVU2Hr1G002640|HORVU5Hr1G124820|HORVU4Hr1G087850|HORVU4Hr1G087100|HORVU5Hr1G125110|HORVU4Hr1G087110|HORVU4Hr1G088690|HORVU4Hr1G088470	1	http://amigo.geneontology.org/amigo/term/GO:1901576
biological_process	nucleic acid phosphodiester bond hydrolysis	GO:0090305	1	297	0.48	0.728	HORVU4Hr1G087200	1	http://amigo.geneontology.org/amigo/term/GO:0090305
biological_process	multicellular organism development	GO:0007275	1	298	0.48	0.728	HORVU4Hr1G087200	1	http://amigo.geneontology.org/amigo/term/GO:0007275
biological_process	organic acid metabolic process	GO:0006082	3	896	0.48	0.302	HORVU4Hr1G087680|HORVU4Hr1G087100|HORVU6Hr1G016280	1	http://amigo.geneontology.org/amigo/term/GO:0006082
biological_process	cellular response to toxic substance	GO:0097237	1	302	0.47	0.728	HORVU6Hr1G063830	1	http://amigo.geneontology.org/amigo/term/GO:0097237
biological_process	cellular detoxification	GO:1990748	1	302	0.47	0.728	HORVU6Hr1G063830	1	http://amigo.geneontology.org/amigo/term/GO:1990748
biological_process	cellular amide metabolic process	GO:0043603	3	968	0.44	0.17	HORVU4Hr1G087880|HORVU5Hr1G124820|HORVU4Hr1G087850|HORVU4Hr1G087110	1	http://amigo.geneontology.org/amigo/term/GO:0043603
biological_process	cell cycle process	GO:0022402	1	328	0.44	0.732	HORVU4Hr1G087200	1	http://amigo.geneontology.org/amigo/term/GO:0022402
biological_process	cell wall organization or biogenesis	GO:0071554	1	338	0.42	0.735	HORVU2Hr1G091270	1	http://amigo.geneontology.org/amigo/term/GO:0071554
biological_process	positive regulation of RNA metabolic process	GO:0051254	1	341	0.42	0.736	HORVU4Hr1G088210	1	http://amigo.geneontology.org/amigo/term/GO:0051254
biological_process	positive regulation of nucleobase-containing compound metabolic process	GO:0045935	1	345	0.41	0.737	HORVU4Hr1G088210	1	http://amigo.geneontology.org/amigo/term/GO:0045935
biological_process	peptidyl-amino acid modification	GO:0018193	1	381	0.38	0.529	HORVU7Hr1G103420	1	http://amigo.geneontology.org/amigo/term/GO:0018193
biological_process	anatomical structure development	GO:0048856	1	387	0.37	0.531	HORVU4Hr1G087200	1	http://amigo.geneontology.org/amigo/term/GO:0048856
biological_process	organonitrogen compound biosynthetic process	GO:1901566	4	1551	0.37	0.0281	HORVU2Hr1G091290|HORVU4Hr1G088440|HORVU4Hr1G087880|HORVU4Hr1G087850|HORVU4Hr1G087100	1	http://amigo.geneontology.org/amigo/term/GO:1901566
biological_process	cellular nitrogen compound biosynthetic process	GO:0044271	4	1553	0.37	0.0281	HORVU4Hr1G088440|HORVU4Hr1G087880|HORVU4Hr1G087850|HORVU5Hr1G125110|HORVU4Hr1G088690	1	http://amigo.geneontology.org/amigo/term/GO:0044271
biological_process	cellular macromolecule biosynthetic process	GO:0034645	4	1631	0.35	0.0209	HORVU2Hr1G091290|HORVU4Hr1G087880|HORVU4Hr1G087850|HORVU5Hr1G125110|HORVU4Hr1G088690	1	http://amigo.geneontology.org/amigo/term/GO:0034645
biological_process	carboxylic acid biosynthetic process	GO:0046394	1	411	0.35	0.539	HORVU4Hr1G087100	1	http://amigo.geneontology.org/amigo/term/GO:0046394
biological_process	cellular amino acid metabolic process	GO:0006520	1	414	0.35	0.378	HORVU4Hr1G087100	1	http://amigo.geneontology.org/amigo/term/GO:0006520
biological_process	macromolecule biosynthetic process	GO:0009059	4	1679	0.34	0.0153	HORVU2Hr1G091290|HORVU4Hr1G087880|HORVU5Hr1G125110|HORVU4Hr1G088690	1	http://amigo.geneontology.org/amigo/term/GO:0009059
biological_process	inorganic cation transmembrane transport	GO:0098662	1	420	0.34	0.378	HORVU5Hr1G094430	1	http://amigo.geneontology.org/amigo/term/GO:0098662
biological_process	organic acid biosynthetic process	GO:0016053	1	428	0.33	0.379	HORVU4Hr1G087100	1	http://amigo.geneontology.org/amigo/term/GO:0016053
biological_process	mRNA metabolic process	GO:0016071	1	435	0.33	0.38	HORVU4Hr1G088210	1	http://amigo.geneontology.org/amigo/term/GO:0016071
biological_process	positive regulation of cellular metabolic process	GO:0031325	1	448	0.32	0.383	HORVU4Hr1G088210	1	http://amigo.geneontology.org/amigo/term/GO:0031325
biological_process	positive regulation of nitrogen compound metabolic process	GO:0051173	1	451	0.32	0.383	HORVU4Hr1G088210	1	http://amigo.geneontology.org/amigo/term/GO:0051173
biological_process	positive regulation of macromolecule metabolic process	GO:0010604	1	457	0.31	0.385	HORVU4Hr1G088210	1	http://amigo.geneontology.org/amigo/term/GO:0010604
biological_process	inorganic ion transmembrane transport	GO:0098660	1	463	0.31	0.387	HORVU5Hr1G094430	1	http://amigo.geneontology.org/amigo/term/GO:0098660
biological_process	positive regulation of metabolic process	GO:0009893	1	463	0.31	0.387	HORVU4Hr1G088210	1	http://amigo.geneontology.org/amigo/term/GO:0009893
biological_process	positive regulation of cellular process	GO:0048522	1	481	0.3	0.271	HORVU4Hr1G088210	1	http://amigo.geneontology.org/amigo/term/GO:0048522
biological_process	small molecule biosynthetic process	GO:0044283	1	571	0.25	0.196	HORVU4Hr1G087100	1	http://amigo.geneontology.org/amigo/term/GO:0044283
biological_process	translation	GO:0006412	1	730	0.2	0.0688	HORVU4Hr1G087880/HORVU4Hr1G087850	1	http://amigo.geneontology.org/amigo/term/GO:0006412
biological_process	peptide biosynthetic process	GO:0043043	1	737	0.19	0.0691	HORVU4Hr1G087880/HORVU4Hr1G087850	1	http://amigo.geneontology.org/amigo/term/GO:0043043
biological_process	amide biosynthetic process	GO:0043604	1	780	0.18	0.0482	HORVU4Hr1G087880/HORVU4Hr1G087850	1	http://amigo.geneontology.org/amigo/term/GO:0043604
biological_process	peptide metabolic process	GO:0006518	1	876	0.16	0.0353	HORVU4Hr1G087880/HORVU4Hr1G087850	1	http://amigo.geneontology.org/amigo/term/GO:0006518
