# Supplementary material for: Integrated GWAS and transcriptomic analysis reveal the candidate salt-responding genes regulating Na+/K+ balance in barley (Hordeum vulgare L.)
Source: Front Plant Sci. 2023 Jan 20;13:1004477. doi: 10.3389/fpls.2022.1004477 (PMC9910287; doi:10.3389/fpls.2022.1004477)
Supplement: Supplementary file 7 [file Table_7.xls]

## Sheet: Table S7
Supplementary Table 7. Statistics of RNA-Seq numerical data analysis in CM72 (C) and Gairdner (G) barley seedlings. 0h (salt stressed for 0 h), 3h (salt stressed for 3 h), 12h (salt stressed for 12 h), 24h (salt stressed for 48 h).
Sample	Reads (Millions)	Reads Aligned (Millions)	% Aligned
Gairdner-0h-1	23.3797	22.1224	0.946225
Gairdner-0h-2	20.6054	19.4599	0.944408
Gairdner-0h-3	22.0811	20.7552	0.939953
Gairdner-12h-1	24.3531	22.7538	0.934331
Gairdner-12h-2	20.3342	18.9911	0.933949
Gairdner-12h-3	22.5338	21.1116	0.936885
Gairdner-3h-1	20.0188	18.8547	0.941847
Gairdner-3h-2	22.6386	21.0719	0.930792
Gairdner-3h-3	22.4719	20.9132	0.93064
Gairdner-48h-1	24.1364	22.5759	0.935345
Gairdner-48h-2	19.7115	18.3283	0.929826
Gairdner-48h-3	21.9973	20.5783	0.935494
CM72-0h-1	25.7728	24.1274	0.936155
CM72-0h-2	20.2379	18.8663	0.932226
CM72-0h-3	22.4721	21.0592	0.937126
CM72-12h-1	20.9758	19.3375	0.921895
CM72-12h-2	20.277	18.6515	0.919835
CM72-12h-3	21.4404	19.7552	0.921401
CM72-3h-1	20.4712	18.9492	0.925651
CM72-3h-2	20.1291	18.594	0.923741
CM72-3h-3	18.4896	17.1477	0.927425
CM72-48h-1	20.4295	19.0587	0.932903
CM72-48h-2	21.1606	19.5624	0.924477
CM72-48h-3	20.7705	19.1914	0.923976
Max	25.7728	24.1274	0.946225
Min	18.4896	17.1477	0.919835
Average	21.537	20.0757	0.931938
