# Supplementary material for: Integrated GWAS and transcriptomic analysis reveal the candidate salt-responding genes regulating Na+/K+ balance in barley (Hordeum vulgare L.)
Source: Front Plant Sci. 2023 Jan 20;13:1004477. doi: 10.3389/fpls.2022.1004477 (PMC9910287; doi:10.3389/fpls.2022.1004477)
Supplement: Supplementary file 8 [file Table_8.xls]

## Sheet: Table S8
Supplementary Table 8 List of five salt-tolerant and five salt-sensitive barley varieties.
Number	Variety name	CK-Na+ (mg/g)	Salt-Na+ (mg/g)	R-Na+	CK-K+ (mg/g)	Salt-K+ (mg/g)	R-K+	CK-Na+/K+	Salt-Na+/K+	R-Na+/K+	Haplotype
S1	Shan 3	4.0149	70.3082	17.5117	63.2521	18.1501	0.2869	0.0635	3.8737	61.0272	Hap2
S2	AKHELOL 1	2.4124	46.7482	19.3784	59.6793	22.8033	0.3821	0.0404	2.0501	50.7159	Hap2
S3	Boyer	3.1361	64.3951	20.5334	62.0024	26.9635	0.4349	0.0506	2.3882	47.2163	Hap2
S4	Rainbow	3.7974	93.1631	24.5331	64.3722	20.5822	0.3197	0.059	4.5264	76.7291	Hap2
S5	Birka	1.7034	56.4376	33.1319	55.0179	15.7486	0.2862	0.031	3.5837	115.747	Hap2
S6	Gairdner
T1	PALLIDUM 043	10.5003	30.9346	2.9461	54.1723	24.8627	0.459	0.1938	1.2442	6.419	Hap1
T2	KIMALUNG	7.6376	31.7893	4.1622	36.2692	23.1306	0.6377	0.2106	1.3743	6.5265	Hap1
T3	Zhu Damai 5	11.8643	44.9826	3.7914	64.0771	31.1217	0.4857	0.1852	1.4454	7.8063	Hap1
T4	GURZAN	9.331	37.1422	3.9805	47.2327	21.7689	0.4609	0.1976	1.7062	8.6366	Hap1
T5	Kunlun 14	7.8751	37.0254	4.7016	64.942	30.4217	0.4684	0.1213	1.2171	10.0366	Hap1
T6	CM72
