# Supplementary material for: Integrated GWAS and transcriptomic analysis reveal the candidate salt-responding genes regulating Na+/K+ balance in barley (Hordeum vulgare L.)
Source: Front Plant Sci. 2023 Jan 20;13:1004477. doi: 10.3389/fpls.2022.1004477 (PMC9910287; doi:10.3389/fpls.2022.1004477)
Supplement: Supplementary file 9 [file Table_9.xls]

## Sheet: Table S9
Supplementary Table 9 List of primers for RT-PCR.
Gene ID	Anotation	Primer sequences-F	Primer sequences-R
HORVU4Hr1G088190	2-phosphoglycerate kinase	ATACAAGGCCAGGACTGCTT	TGTGCATTGCCTTCAGCTTT
HORVU6Hr1G016070	Sodium Bile acid symporter family	GCAGCCTTTGTTGTGGGTTA	CTAGGGTGGAGCTCTGCATT
HORVU6Hr1G016120	E3 ubiquitin-protein ligase SINAT2	TCCATGCAAGTACCAAAGCC	GCACTCTGAACCTGCGTATG
HORVU6Hr1G064140	Aquaporin-like superfamily protein	CCTTGGTGCCGAGATCATTG	GAGTCCCTGGCATTCCTCTT
HORVU7Hr1G101310	Calcium-dependent lipid-binding (CaLB domain) family protein	AACGAGGAGTTCCAGTTCGT	CCTGGAGTTGATGAGGTGGT
HORVU2Hr1G002690	receptor kinase 2	GAAGAGGCTGTCCAATACGC	TCGAAGCAGAGCAACCTTTG
HORVU5Hr1G124800	Serine/threonine-protein kinase	CCAGCTCTGTGCTGAAACTC	GCCGGGAAATCAAAGGTCTC
HORVU5Hr1G124880	MATE efflux family protein	GTGGTGCTACGAGATCCTGA	GCGAAGAGGAGGTAGTCGAA
Reference gene	UBQ	GAAGCAAAAGCACAAGCACA	TCCTGAGCCTGGTTACCTTG
