# Supplementary material for: Integrated GWAS and transcriptomic analysis reveal the candidate salt-responding genes regulating Na+/K+ balance in barley (Hordeum vulgare L.)
Source: Frontiers journal article supplement (doi:10.3389/fpls.2022.1004477), 2023-01-20
Supplement: Table_10.XLS [file Table_10.XLS]

## Sheet: Table S10
Supplementary Table 10 Allelic variation in 8 putative candidate genes using cv. Morex as a standard by RNA-Seq in CM72 and Gairdner.
Gene	HORVU4Hr1G088190														HORVU6Hr1G016070																							HORVU6Hr1G064140
Chr	Chr4H	Chr4H	Chr4H	Chr4H	Chr4H	Chr4H	Chr4H	Chr4H	Chr4H	Chr4H	Chr4H	Chr4H	Chr4H	Chr4H	Chr6H	Chr6H	Chr6H	Chr6H	Chr6H	Chr6H	Chr6H	Chr6H	Chr6H	Chr6H	Chr6H	Chr6H	Chr6H	Chr6H	Chr6H	Chr6H	Chr6H	Chr6H	Chr6H	Chr6H	Chr6H	Chr6H	Chr6H	Chr6H	Chr6H	Chr6H	Chr6H	Chr6H	Chr6H	Chr6H	Chr6H	Chr6H	Chr6H	Chr6H	Chr6H
Position	639939696	639939716	639939953	639941036	639941037	639943941	639944687	639944726	639944803	639944892	639944935	639946251	639946731	639946767	35935557	35935599	35935839	35935840	35935884	35936635	35937064	35949518	35949639	36031475	36031544	36031676	36031691	36032008	36032026	36032193	36032266	36032843	36032947	36032950	36033708	36033804	36033852	433611114	433611225	433611227	433611256	433611265	433611511	433611629	433611908	433612074	433612119	433613141	433613179
Ref	A	C	C	A	C	A	A	C	A	G	C	G	G	A	T	A	A	A	G	C	G	G	A	A	C	C	A	A	C	A	G	C	G	G	T	G	C	C	T	A	C	T	A	A	A	G	T	C	A
Gairdner-0h-1	C	A	N	N	N	N	G	T	G	A	A	N	A	G	T	A	A	A	G	G	G	G	G	G	C	A	C	A	C	A	G	N	N	N	G	G	A	T	T	G	C	T	A	A	A	A	T	C	G
Gairdner-0h-2	C	A	N	A	C	N	G	T	G	A	A	T	A	N	Y	N	A	A	G	S	G	G	A	G	C	A	C	A	C	A	G	N	N	N	G	G	A	Y	Y	R	C	T	A	A	A	R	T	C	N
Gairdner-0h-3	C	A	N	A	C	N	G	T	G	A	A	T	A	G	T	W	A	A	G	S	G	G	R	G	C	A	C	A	C	A	G	N	N	N	G	G	A	Y	T	A	C	T	A	A	A	R	T	C	G
Gairdner-12h-1	C	A	C	N	N	N	G	T	G	A	A	T	A	G	T	A	A	A	G	G	G	G	N	G	C	A	C	A	C	A	G	N	G	G	G	G	A	T	T	G	C	T	A	A	A	A	T	C	G
Gairdner-12h-2	C	A	C	N	N	N	G	T	G	A	A	T	A	G	T	W	A	A	G	S	G	G	G	G	C	A	C	A	C	A	G	T	G	G	G	G	A	T	T	G	C	T	A	A	A	A	T	C	G
Gairdner-12h-3	C	A	C	A	C	N	G	T	G	A	A	T	A	N	T	T	W	M	R	C	G	G	A	G	C	A	C	A	C	A	G	C	G	G	G	G	A	C	T	A	C	T	A	A	A	R	T	C	A
Gairdner-3h-1	C	A	C	A	C	G	G	T	G	A	A	T	A	G	N	N	A	A	G	S	G	G	G	G	C	A	C	A	C	A	G	N	N	N	G	G	A	Y	T	R	C	T	A	A	A	R	T	C	R
Gairdner-3h-2	C	A	C	A	C	G	G	T	G	A	A	T	A	G	T	N	A	A	G	G	G	G	N	G	M	A	C	A	C	A	G	Y	G	G	G	G	A	T	T	G	C	T	A	A	A	A	T	C	G
Gairdner-3h-3	C	A	C	A	C	G	G	T	G	A	A	N	A	G	N	A	A	A	G	G	G	G	N	G	C	A	C	A	C	A	G	N	N	N	G	G	A	T	T	G	C	T	A	A	R	A	T	C	G
Gairdner-48h-1	C	A	C	N	N	G	G	T	G	A	A	T	N	N	Y	A	A	A	G	G	G	G	G	G	C	A	C	A	C	A	G	Y	N	N	G	G	A	T	N	N	N	N	A	N	A	A	T	C	G
Gairdner-48h-2	C	A	C	M	M	G	G	T	G	A	A	T	A	N	T	A	A	A	G	G	G	G	G	G	C	A	C	A	C	A	G	Y	G	G	G	G	A	T	N	N	S	Y	A	N	N	A	N	N	G
Gairdner-48h-3	C	A	C	N	N	N	G	T	G	N	A	T	A	G	T	A	A	A	G	G	G	G	G	G	C	A	C	A	C	A	G	Y	G	G	G	G	A	T	T	G	C	T	A	A	A	A	N	C	G
CM72-0h-1	C	A	Y	M	M	G	G	T	G	A	A	T	N	N	C	A	A	A	G	C	A	G	G	G	C	A	C	G	Y	G	A	N	N	N	G	A	C	C	C	A	G	C	N	N	A	A	C	N	G
CM72-0h-2	C	A	N	A	C	G	G	T	G	A	A	T	A	G	C	A	N	N	N	C	A	R	G	G	C	A	C	G	C	G	A	N	N	N	G	A	C	C	C	A	S	Y	N	W	A	A	N	N	N
CM72-0h-3	C	A	C	A	C	N	G	T	G	A	N	T	N	N	C	A	A	A	N	C	A	G	G	G	C	A	C	G	C	G	A	N	N	N	G	A	C	C	C	A	G	C	G	T	A	A	C	S	G
CM72-12h-1	C	A	C	A	C	N	G	T	G	A	A	T	A	G	C	A	A	A	G	C	A	G	G	G	C	A	C	G	C	G	A	C	G	G	G	A	C	C	C	A	G	C	R	N	A	A	N	N	G
CM72-12h-2	C	A	N	A	C	N	G	T	G	A	A	T	A	G	C	A	A	A	G	C	A	G	G	G	C	A	C	G	C	G	A	C	R	R	G	A	C	C	C	A	S	Y	R	T	A	A	Y	N	N
CM72-12h-3	C	A	C	A	C	G	G	T	G	A	A	T	A	N	C	A	A	A	N	C	A	G	G	G	C	A	C	G	C	G	A	C	G	G	G	A	C	C	C	A	G	C	R	N	A	A	Y	S	N
CM72-3h-1	C	A	C	N	N	G	G	T	G	A	A	T	N	N	C	A	A	A	N	C	A	G	G	G	C	A	C	G	C	G	A	C	N	N	G	A	C	C	C	A	G	C	G	T	A	A	C	G	G
CM72-3h-2	C	A	C	A	C	G	G	T	G	R	A	N	N	G	C	A	A	A	G	C	A	G	G	G	C	A	C	G	C	G	A	N	N	N	G	A	C	C	C	A	G	C	G	N	A	A	C	G	G
CM72-3h-3	C	A	C	A	C	G	G	T	G	A	A	T	N	N	C	A	A	A	G	C	A	G	G	G	C	A	C	G	C	G	A	C	R	R	G	A	C	C	C	A	G	C	R	T	A	A	C	G	G
CM72-48h-1	C	A	C	N	N	N	G	T	G	N	A	T	A	G	C	N	N	N	N	C	A	G	G	G	C	A	C	G	C	G	A	N	N	N	G	A	C	C	C	A	S	Y	N	N	N	A	N	S	G
CM72-48h-2	C	A	C	N	N	G	G	T	G	A	A	T	N	N	C	A	A	A	G	C	A	G	G	G	C	A	C	G	C	G	A	C	G	G	G	A	C	C	N	N	N	N	N	N	A	A	N	N	N
CM72-48h-3	C	A	C	N	N	G	G	T	G	A	A	T	A	G	N	A	A	A	G	C	A	G	G	G	C	A	C	G	C	G	A	N	N	N	G	A	C	C	C	A	S	Y	N	T	A	A	C	N	N
[truncated: 70 more columns]
